# Supplementary material for: Identification of Survival-Associated Alternative Splicing Signatures in Lung Squamous Cell Carcinoma
Source: Front Oncol. 2020 Sep 30;10:587343. doi: 10.3389/fonc.2020.587343 (PMC7561379; doi:10.3389/fonc.2020.587343)
Supplement: Supplementary file 1 [file Table_1.XLS]

id	z	HR	HR.95L	HR.95H	pvalue
PAPPA|87365|ES	-5.182068076	2.23E-12	8.75E-17	5.69E-08	2.19E-07
KIAA1598|13239|AP	-5.176964889	2.41E-05	4.29E-07	0.001348946	2.26E-07
GSTM2|4063|AD	-4.619822105	5.64E-07	1.26E-09	0.000252523	3.84E-06
TLE3|31424|ES	-4.495693116	1.88E-06	5.98E-09	0.000588841	6.93E-06
TACC1|83445|ES	-4.469812044	1.04E-06	2.47E-09	0.000436544	7.83E-06
RGS5|8770|AP	-4.469735791	1.76E-06	5.29E-09	0.000587733	7.83E-06
ALPK1|70369|ES	-4.465441314	6.97E-11	2.43E-15	2.00E-06	7.99E-06
SUSD4|9918|ES	-4.434090964	1.87E-06	5.47E-09	0.000635646	9.25E-06
ICA1|78791|ES	-4.424555189	1.26E-06	3.08E-09	0.000518031	9.66E-06
STMN3|60140|AP	-4.418819819	1.60E-06	4.28E-09	0.000594688	9.92E-06
NOL8|86863|ES	-4.412013853	0.05925743	0.016887065	0.207936853	1.02E-05
TSGA13|81809|AP	-4.396580957	1.52E-06	3.87E-09	0.000596033	1.10E-05
GNAQ|86654|AP	-4.392837778	0.000227619	5.39E-06	0.00960556	1.12E-05
ZNF185|90402|ES	-4.384508462	1.46E-06	3.60E-09	0.000593129	1.16E-05
CCPG1|30729|AA	-4.383120999	2.65E-06	8.51E-09	0.000826271	1.17E-05
PLEKHG2|49826|ES	-4.355296415	1.08E-05	6.28E-08	0.00185449	1.33E-05
NPIPB4|34549|RI	-4.342868224	1.64E-06	4.02E-09	0.000669596	1.41E-05
NPIPB4|34548|RI	-4.342868224	1.64E-06	4.02E-09	0.000669596	1.41E-05
PLCH2|276|ES	-4.334360426	1.68E-06	4.12E-09	0.00068721	1.46E-05
ZNF10|25339|RI	-4.334189079	2.61E-06	7.78E-09	0.000873276	1.46E-05
ZNF358|47105|AP	-4.333095662	1.69E-06	4.14E-09	0.000689895	1.47E-05
TLE3|31410|AA	-4.333095662	1.69E-06	4.14E-09	0.000689895	1.47E-05
LUC7L3|42475|RI	-4.328108805	5.54E-06	2.31E-08	0.001329812	1.50E-05
RNF43|42673|ES	-4.304234824	6.55E-06	2.86E-08	0.001502018	1.68E-05
ARHGAP4|90530|ES	-4.291063976	2.40E-06	6.50E-09	0.000884709	1.78E-05
MAP4K2|16692|AA	-4.280881486	2.01E-06	4.94E-09	0.00081474	1.86E-05
SETD1B|24902|RI	-4.261560796	2.18E-06	5.43E-09	0.000875828	2.03E-05
EPHB6|82070|ES	-4.251033118	2.17E-06	5.32E-09	0.000887133	2.13E-05
CHD4|19898|AA	-4.24669546	2.25E-06	5.55E-09	0.000908597	2.17E-05
SELENBP1|7625|ES	-4.173887427	4.10E-06	1.21E-08	0.001388489	2.99E-05
GPR124|83355|ES	-4.157247612	2.95E-05	2.15E-07	0.004029828	3.22E-05
CPT1B|62875|ES	-4.155038782	5.89E-06	2.01E-08	0.001726707	3.25E-05
RARRES2|82228|AD	-4.14724298	5.12E-06	1.62E-08	0.001619828	3.37E-05
SLC29A2|17027|AA	-4.047424836	1.94E-05	1.02E-07	0.003717398	5.18E-05
MED12|89397|ES	-3.994528045	2.54E-05	1.42E-07	0.004569199	6.48E-05
RAD51C|42720|AD	3.97876258	292.9246443	17.84909153	4807.238906	6.93E-05
CORO7|33674|AA	-3.962643885	5.82E-06	1.50E-08	0.002259814	7.41E-05
VCAM1|3888|ES	-3.954193364	2.22E-05	1.10E-07	0.004497932	7.68E-05
LEF1|70295|ES	-3.927661777	5.21E-06	1.20E-08	0.002254576	8.58E-05
FAM124B|57773|AT	3.914615894	11.86552593	3.438860833	40.9410885	9.05E-05
NT5C2|12992|ES	3.907180735	28.69215809	5.327256657	154.5335599	9.34E-05
FAM124B|57772|AT	-3.890571955	0.085430976	0.024739581	0.295011124	0.000100008
TAF8|76169|AA	-3.863790591	2.78E-05	1.36E-07	0.005694487	0.000111641
NID1|10365|ES	-3.843427054	1.73E-05	6.46E-08	0.004640962	0.000121328
TM4SF19|68238|AT	-3.835432657	0.010924486	0.001086411	0.109851933	0.000125343
RAB3IP|23348|ES	-3.804977091	6.42E-05	4.44E-07	0.009268717	0.000141817
PODN|3051|ES	-3.785544898	0.000196603	2.37E-06	0.016314796	0.000153372
ZNF544|52429|ES	-3.779843416	0.032985221	0.005623709	0.193471026	0.000156927
COX5A|31812|ES	-3.772108075	0.163774243	0.06396943	0.419294068	0.000161874
VPS37A|82796|ES	-3.692441622	5.58E-05	3.08E-07	0.010100055	0.000222111
CRISPLD1|84229|ES	-3.687114216	1.20E-05	2.92E-08	0.00496153	0.000226812
ARPC1A|80601|AT	-3.669027208	0.03019801	0.004655811	0.195867026	0.000243475
ARPC1A|80602|AT	3.668903102	33.10996936	5.104837323	214.7512255	0.000243593
FBF1|43530|AT	-3.641470167	0.020659087	0.002560037	0.16671552	0.000271086
FBF1|43529|AT	3.641380898	48.39969627	5.997639842	390.5754031	0.00027118
FOS|28497|AD	-3.638773405	0.000305662	3.91E-06	0.023900497	0.00027394
ARHGAP44|39326|ES	-3.62058257	0.015339963	0.001598599	0.14720043	0.00029394
CCNL1|67384|AD	-3.576341507	0.00132018	3.49E-05	0.049960862	0.000348436
PKP4|55682|AA	-3.564737317	1.65E-05	3.87E-08	0.007029175	0.000364221
ZSCAN5A|52163|AP	3.564114532	18.55638573	3.723303558	92.48223953	0.000365087
PTCHD4|76446|AT	-3.564106406	0.185072824	0.073188299	0.467997622	0.000365098
PTCHD4|76445|AT	3.561344775	5.406614877	2.135819133	13.68631078	0.00036896
PLSCR1|67168|ES	3.554801185	6.679224927	2.344270385	19.03024749	0.000378265
HHAT|9700|ES	-3.550989105	0.004127489	0.000199373	0.085448626	0.000383786
CDK5RAP2|87383|ES	-3.543569938	8.43E-05	4.70E-07	0.015107882	0.000394749
SSH1|24258|ES	3.522901135	10.14569008	2.795357881	36.82355949	0.000426851
RERE|546|ES	3.509618276	41.65096774	5.189640958	334.2819142	0.00044875
CMTM8|63813|ES	-3.504159154	8.22E-05	4.26E-07	0.015839136	0.000458052
AP4B1|4309|RI	3.495705234	4.91253306	2.012361099	11.99237109	0.000472811
ZSCAN5A|52162|AP	-3.495416088	0.083468691	0.020739387	0.335931936	0.000473323
TOX2|59455|ES	-3.492783642	0.014099548	0.001290143	0.154089331	0.000478014
MAPKAP1|87585|ES	-3.466629132	3.21E-08	1.86E-12	0.00055326	0.000527029
CHMP1A|38102|ES	-3.453538904	5.12E-06	5.09E-09	0.005150761	0.000553282
NPNT|70261|ES	3.448502293	15.57254389	3.270990939	74.1378156	0.000563705
C16orf45|34154|AP	-3.439861279	0.039468888	0.006257906	0.248931987	0.000582012
ZFP90|37235|AA	3.434685934	18.57993125	3.506539181	98.44859198	0.000593241
KHK|52929|ME	-3.422085636	7.61E-07	2.38E-10	0.002431516	0.000621427
SPTLC3|58702|ES	-3.41716265	0.019907513	0.002105684	0.188209208	0.000632775
NDRG2|26500|ES	3.415290182	8.925868163	2.541510694	31.3479391	0.000637141
TENC1|21928|AD	-3.411368136	0.000111703	5.99E-07	0.020826028	0.000646378
C16orf46|37751|AT	-3.411026869	0.126579148	0.038599586	0.415089449	0.000647187
C16orf46|37750|AT	3.411018892	7.900110665	2.409101614	25.90664842	0.000647206
CMTM3|36813|ES	-3.398383722	1.21E-07	1.23E-11	0.001179429	0.000677853
IREB2|32093|AD	-3.393931785	0.000653688	9.47E-06	0.0451299	0.000688969
EXO5|2003|RI	-3.38899966	0.260620187	0.119747742	0.567216391	0.000701481
ZNF544|52430|ES	-3.381074009	0.126211587	0.038020543	0.418967315	0.000722031
EVI5L|47191|ES	3.359924889	11.99011189	2.81518654	51.06687641	0.000779637
HMGB1|25569|RI	-3.345411002	0.096454603	0.024505969	0.379641811	0.000821607
SMC4|67484|AA	-3.325409843	4.60E-05	1.28E-07	0.016561394	0.000882886
KIFC3|36615|ES	-3.316128673	0.290167227	0.139653608	0.602898993	0.000912738
FCGR3A|8673|AP	3.298771131	21.36858075	3.4648929	131.783653	0.000971091
YPEL3|36072|ES	-3.296395667	6.41E-05	2.06E-07	0.019957564	0.00097934
RPLP2|13770|AD	3.294609262	19.15828244	3.307366198	110.9764581	0.000985586
WASH4P|32775|AD	3.292088519	6.083331782	2.076339249	17.82315948	0.000994463
GTPBP10|80387|AP	-3.283277196	4.57E-05	1.17E-07	0.017816629	0.001026077
PHF15|73403|ES	-3.282749845	0.039498477	0.005736796	0.271951387	0.001027998
CMTM3|36815|ES	-3.267273639	3.86E-09	3.47E-14	0.000430168	0.001085887
CCDC142|54075|AA	-3.26358912	0.045493796	0.007111791	0.291021708	0.001100106
SEMA3F|64965|ES	-3.259448523	0.005197997	0.000219952	0.122841233	0.00111629
HMHA1|46375|AP	-3.258367995	0.128186463	0.037255808	0.441052548	0.00112055
KDM3B|73543|RI	-3.256101858	3.62E-05	7.69E-08	0.017069978	0.001129532
MMP19|22271|ES	-3.255399557	0.008390539	0.000471819	0.149212258	0.001132329
CUX1|81071|AT	3.243490023	64.21230204	5.191794219	794.1801155	0.001180749
CUX1|81070|AT	-3.243387855	0.015575861	0.001259387	0.192639238	0.001181173
CEP57L1|77169|AA	-3.234566802	0.048654358	0.007790978	0.303844575	0.001218274
CNOT8|74259|ES	-3.230629181	1.50E-08	2.70E-13	0.000837605	0.001235181
COLEC11|52578|AP	3.228301864	2.509098914	1.435366723	4.386041045	0.001245275
CBWD3|86515|ES	3.223230796	62.25227893	5.048652244	767.6001524	0.001267534
S100A6|119889|AA	-3.221393537	0.199508922	0.074824631	0.531961321	0.001275688
CLDN10|26114|AP	-3.221265824	0.050541083	0.008220215	0.310746254	0.001276257
UBXN2A|52794|AP	3.217191077	9.025043722	2.362514009	34.47658464	0.001294524
UBXN2A|52795|AP	-3.217132189	0.110808461	0.029006872	0.423296767	0.001294789
MANSC1|20504|RI	-3.214685229	0.000108057	4.12E-07	0.028307237	0.001305876
FUK|37396|ES	-3.206153379	2.94E-05	4.99E-08	0.017322183	0.001345223
THAP5|81418|AD	-3.20437203	0.01450387	0.001088804	0.193204801	0.001353574
SOCS2|23706|AP	-3.202681136	0.12935176	0.036999711	0.452216443	0.001361546
ATG4D|47539|ES	3.20241197	5.887760566	1.989388168	17.42531952	0.001362819
GBP3|3709|AD	-3.1958018	0.237111276	0.098087701	0.573178459	0.001394429
SOGA2|44571|AP	3.195235173	3.798960026	1.67531764	8.614543856	0.001397169
MOCS2|71995|AP	-3.193252938	0.002728353	7.28E-05	0.102258854	0.001406797
MOCS2|71996|AP	3.193252938	366.5214391	9.77910433	13737.24635	0.001406797
YPEL3|36068|AP	-3.192158903	0.356723736	0.189437908	0.671733687	0.001412136
AP3B2|32239|AT	-3.19164493	0.334157546	0.170456475	0.655072009	0.001414651
AP3B2|32238|AT	3.191626648	2.992587413	1.526541294	5.866581837	0.001414741
YPEL3|36066|AP	3.183729825	2.787914525	1.483054272	5.24085163	0.001453906
TSPAN14|12377|ES	-3.180486092	0.077276976	0.015951984	0.374356638	0.001470282
TRAF4|39978|AA	-3.178429638	1.52E-05	1.62E-08	0.014219997	0.001480752
TRAF5|9716|ES	-3.169633774	5.29E-05	1.20E-07	0.023335136	0.001526312
SLC45A4|85332|AP	-3.167936488	5.98E-05	1.46E-07	0.024532147	0.001535251
DMKN|49202|ES	3.158748893	3.643622807	1.63346182	8.127516049	0.001584479
PNKD|57461|AP	3.158649789	6.404877137	2.023323315	20.27478794	0.001585018
ZBTB8A|1609|AA	3.158232264	8.122450363	2.213835474	29.8008595	0.00158729
GTPBP10|80392|ES	3.158012997	156.3364318	6.797609073	3595.540672	0.001588485
NRF1|81749|AP	-3.152798908	0.101176226	0.024354383	0.42031977	0.001617132
VEGFA|76346|ES	-3.147818728	5.30E-08	1.56E-12	0.001796965	0.001644937
PNKD|57460|AP	-3.147293797	0.157376181	0.049754932	0.497785066	0.001647893
ARHGEF25|22665|AP	-3.146373969	0.12171702	0.032778658	0.451971923	0.001653085
RFWD2|9054|ES	3.145713709	9.533831818	2.339518349	38.85156497	0.001656821
NRF1|81751|AP	3.139804189	9.813362385	2.358816299	40.8264439	0.001690608
NPIPB4|34531|AP	-3.136857518	0.2298798	0.091739262	0.576031698	0.001707691
LTBP4|107680|ES	3.128481633	64.76087202	4.748347761	883.2483963	0.00175712
ARHGEF25|22664|AP	3.123873916	8.108862698	2.181048083	30.14773254	0.001784869
SH3BP4|58079|AP	-3.123722836	0.205925133	0.07640113	0.555033153	0.001785786
RABL2B|62922|AA	-3.122346052	0.019344531	0.001625526	0.230209154	0.001794159
ZFP64|59807|AP	-3.108693138	0.20096578	0.07307278	0.55269889	0.001879168
TCTEX1D2|68236|ES	3.097113228	11.48358672	2.450318709	53.81861691	0.001954152
ECHDC2|3033|ES	-3.097039146	0.287298551	0.130478594	0.632597693	0.001954641
TRO|89258|ES	-3.09479636	5.54E-05	1.12E-07	0.027490996	0.001969481
SDHAF2|16237|ES	-3.093903064	0.000308328	1.84E-06	0.051665018	0.00197542
ACBD4|41947|ES	-3.092277727	9.17E-05	2.53E-07	0.033229864	0.001986269
LRP6|20501|AA	-3.084622951	0.000394293	2.71E-06	0.057389119	0.002038103
SHPK|38462|AT	-3.077879267	0.04472545	0.006183593	0.32349571	0.002084794
CLDN5|61070|RI	-3.072363955	0.342177582	0.172637446	0.678216114	0.002123706
SNX17|52994|ES	3.069444983	5.540848574	1.856833407	16.53406429	0.002144569
SLMAP|65400|ES	-3.065708237	0.133173346	0.036697891	0.4832741	0.002171551
COL16A1|90874|ES	3.062226396	10.90139567	2.362905934	50.29418477	0.002196972
SERAC1|78268|ES	-3.055803469	0.012786438	0.000780614	0.209441541	0.002244583
BCAS3|42865|AP	-3.053032194	0.073807698	0.013850121	0.393323359	0.002265416
NAV1|9388|AP	3.052620688	2.655828907	1.418529629	4.972350974	0.002268525
POLR2L|13788|AT	3.052518765	17.79256155	2.802103903	112.9776972	0.002269295
POLR2L|13787|AT	-3.052424698	0.056208846	0.008852244	0.356907724	0.002270007
TSTD2|87013|AT	-3.04569069	4.75E-05	7.83E-08	0.028753746	0.002321465
CORO7|33672|ES	-3.045411265	0.081881338	0.01635811	0.409861129	0.002323623
ZFP64|59809|AP	3.045144152	2.886797796	1.459069169	5.711587699	0.002325688
LBR|9988|ES	-3.038566245	0.002697811	5.94E-05	0.122485344	0.002377068
PDXK|192507|ES	-3.034579038	0.28210749	0.124580539	0.638820768	0.002408716
ARMC5|36260|RI	-3.031535337	0.248166981	0.100793085	0.611022572	0.002433134
CHD9|36413|AA	3.031097018	6.236955824	1.909538779	20.3712113	0.002436669
STRA6|31688|AD	-3.028382883	0.350108581	0.17750541	0.690548071	0.002458664
SH3BP4|58080|AP	3.026366679	4.665785638	1.720716956	12.65144482	0.002475119
SERPINB13|45719|ES	-3.024837321	2.11E-06	4.42E-10	0.010035766	0.002487669
CCNG2|69631|AT	-3.020131776	0.036527759	0.004263966	0.312919306	0.002526647
RCOR3|9709|ES	-3.014592466	0.128213163	0.033724623	0.487436587	0.002573248
COL1A2|306285|ES	3.01385745	17.37760778	2.713956647	111.2697407	0.00257949
TMEM205|47674|ES	-3.011651036	0.197508089	0.068731506	0.567562787	0.002598311
ATP8B3|46544|AT	-3.011001713	0.406794606	0.226518739	0.73054376	0.002603874
ATP8B3|46543|AT	3.010996584	2.458235488	1.368840564	4.414627875	0.002603918
PSMA3|27692|ES	-3.010791245	0.191626385	0.065365453	0.561774907	0.002605679
SEC24C|12192|ES	-3.010787678	4.77E-07	3.66E-11	0.006219014	0.00260571
IL11RA|86208|AP	3.007751674	2.331829257	1.343048615	4.048571008	0.002631881
MXRA7|43613|ES	3.006862749	52.09654604	3.960417771	685.2938923	0.002639589
PBX1|8791|ES	-3.004758277	6.02E-05	1.06E-07	0.034087471	0.00265792
PLK3|2578|ES	3.002943548	28.79400863	3.212502397	258.0838332	0.00267382
GBP3|3708|ES	3.000049988	5.96539126	1.857402043	19.15896078	0.002699353
DNASE1L1|90575|AP	2.998033573	3.192008815	1.494625083	6.817040868	0.002717277
VPS18|30060|ES	-2.9911703	0.017341829	0.00121692	0.247131303	0.002779105
PCYT2|44229|ES	2.98799585	107698.4033	53.87057699	215311339.4	0.002808134
SEMA4F|54141|ES	-2.985517438	0.004457655	0.000127575	0.155756386	0.00283099
VPS9D1|38130|AP	-2.98248283	0.321249884	0.152321303	0.677524984	0.002859207
VPS9D1|38131|AP	2.982462196	3.112825906	1.475950163	6.565048987	0.0028594
PI4KB|7598|ES	-2.979460279	0.002037925	3.46E-05	0.120025056	0.002887567
AKR1E2|10639|ES	2.978016324	4.777246599	1.706793047	13.37132531	0.002901205
CCNG2|69633|AT	2.977391052	26.12022125	3.049341027	223.7420978	0.002907129
MOV10L1|62785|AD	-2.975793047	0.003354851	7.87E-05	0.143005762	0.00292232
NINJ2|19603|AP	-2.972950049	0.005248375	0.000164784	0.167160733	0.002949524
TNFRSF25|461|ES	-2.969761783	0.00035678	1.89E-06	0.067254999	0.002980308
C22orf39|61056|AT	2.967213796	723.3247402	9.346063479	55980.64692	0.003005119
C4BPB|9624|AT	-2.963946515	0.349066833	0.174039772	0.700113844	0.003037211
SFTPA1|12329|ES	-2.962999852	0.095301288	0.020127666	0.451236392	0.003046567
CACTIN|46713|RI	2.960609085	28.43607998	3.1001874	260.8263761	0.003070314
MELK|86359|ES	-2.960317098	5.10E-05	7.33E-08	0.035429209	0.003073225
ZNF131|71931|ES	-2.959529018	0.00482579	0.000141091	0.16505842	0.003081097
ARHGAP24|69813|AP	2.958986958	3.389938747	1.510097985	7.609893413	0.003086522
BCAS3|42864|AP	2.957722765	12.72091724	2.358296811	68.6180529	0.003099207
CNOT8|74258|ES	-2.952489068	0.031314967	0.003141813	0.312121471	0.003152232
ECHDC2|3037|ES	-2.951912597	0.224441238	0.083225826	0.605267277	0.003158123
FLT4|75015|AT	-2.946260251	0.216318008	0.078121599	0.59898263	0.003216417
FLT4|75016|AT	2.946170747	4.622598504	1.669418624	12.79991526	0.003217347
ENC1|72496|AA	-2.942605873	6.87E-05	1.16E-07	0.040715504	0.003254625
RAP1B|22943|ES	-2.942474316	0.058751236	0.00889338	0.388121037	0.003256008
KIF6|76049|AT	2.941426686	2.38128001	1.33576465	4.245129924	0.003267042
KIF6|76048|AT	-2.941319876	0.419955507	0.23557153	0.748658498	0.003268169
NDUFS7|46465|RI	-2.940541997	0.194967862	0.065569367	0.579729052	0.003276386
UBE3A|93616|ES	-2.938955673	0.233078205	0.088245796	0.615615158	0.003293202
KDM4C|85822|AP	-2.93549762	0.364742185	0.186009085	0.715217007	0.003330132
DSCR3|60556|ES	-2.934893175	0.060015878	0.009170113	0.392787482	0.003336625
TMEM62|30210|AP	-2.929676733	0.325234078	0.153409937	0.68950687	0.003393148
PLA2G4B|30115|AP	2.925313086	23.26036027	2.824759346	191.5364438	0.003441098
TUBGCP2|13527|AP	-2.924174238	0.050401471	0.006803615	0.37337627	0.003453714
ARHGAP24|69814|AP	-2.923544312	0.31755326	0.147173975	0.685175982	0.00346071
URGCP|79354|AP	2.922244633	8.544210117	2.026725526	36.02043079	0.003475185
CCDC66|65347|RI	-2.921922529	0.000783047	6.46E-06	0.094922559	0.003478781
VIPAS39|28598|ES	-2.919939576	1.61E-06	2.09E-10	0.012462439	0.003500993
MX1|60668|ES	-2.913124822	4.77E-05	5.90E-08	0.03854619	0.003578315
MFF|57814|ES	-2.905121891	0.00374303	8.63E-05	0.162355813	0.003671101
KIFC3|36608|ES	2.899306031	357.3579321	6.717015581	19012.11782	0.003739897
ECHDC2|3029|AD	2.897500391	5.850744477	1.771105541	19.32759519	0.003761493
TMEM62|30209|AP	2.895593795	2.981654434	1.423336393	6.246073105	0.003784419
MEMO1|53145|ES	-2.892245696	2.90E-07	1.07E-11	0.007807151	0.003824987
RBM33|82436|AP	-2.891601652	0.08209308	0.015080296	0.44689267	0.003832836
SLC11A2|21725|AP	2.891445757	34.97363894	3.142805122	389.1922577	0.003834738
SRSF7|53278|AA	2.888103453	1867684.079	103.6063397	33668246850	0.003875724
SIGIRR|13653|ES	2.884349409	16.62300551	2.461596458	112.254107	0.003922233
UIMC1|74692|ES	-2.884115887	0.436675755	0.248668811	0.766826021	0.003925143
NBPF12|7362|ES	2.883568385	45.43378692	3.395134674	607.996204	0.003931973
DHPS|47833|ES	-2.881012992	0.001293938	1.40E-05	0.119313496	0.003963993
TMEM41B|14313|AA	2.878915228	52.97814101	3.550852002	790.4253467	0.003990456
XBP1|61563|RI	-2.878893932	0.097470021	0.019975144	0.475611346	0.003990725
MLF1|67432|ES	2.878009285	6.485838306	1.815540753	23.17001062	0.004001934
KIAA1328|45279|AP	2.877242698	2.835925438	1.394187764	5.768572424	0.004011669
KDM4C|85823|AP	2.876263655	2.680187069	1.368994812	5.247209603	0.004024134
ATP6V0B|2512|AD	2.870454425	19.60837574	2.570126568	149.5990135	0.004098823
ZNF23|37444|AD	-2.869494126	0.260477382	0.103925155	0.652858936	0.00411129
CYTH1|43894|ES	-2.868064108	5.65E-09	1.31E-14	0.00244644	0.004129918
RARA|40858|AP	2.865634813	7.359005742	1.879118815	28.81934078	0.00416174
ZNF468|51634|ES	-2.864900833	0.039455151	0.004321718	0.360206026	0.004171399
SH2D3C|87664|AP	2.864342377	4.145896185	1.566768694	10.97063992	0.004178761
UBR5|84778|AA	-2.864250031	0.160072513	0.045692243	0.560778105	0.004179979
BFAR|34095|ES	-2.859946626	0.289554969	0.123836104	0.677040678	0.004237123
PTPN7|9405|AA	-2.859926246	0.030390854	0.002772915	0.333080479	0.004237395
FLJ27365|62678|AP	-2.857504587	0.140395867	0.036519446	0.539739829	0.004269865
IRAK4|21262|ES	-2.854923523	0.009459942	0.000385739	0.231997262	0.004304719
STRA13|44264|AD	-2.854299175	0.048065054	0.005979711	0.386348039	0.004313189
C9orf3|86945|AT	-2.851641187	0.004604683	0.000114049	0.185912234	0.004349417
AFMID|43805|ES	2.850283789	17.40155358	2.440688309	124.0691268	0.004368024
NPIPB4|34534|AP	2.842963451	5.426281108	1.690946849	17.41304092	0.00446962
LRRC1|76511|AA	-2.840967923	0.000226852	6.94E-07	0.074112352	0.004497684
SYNJ2|78242|AP	-2.840730976	0.263136809	0.104745546	0.661039852	0.004501026
SOGA2|44577|AT	2.839217208	65.20843521	3.646333863	1166.141166	0.004522436
SOGA2|44578|AT	-2.839178586	0.015336086	0.000857557	0.274262404	0.004522984
CMTM1|36749|AD	-2.839022922	0.000764228	5.39E-06	0.108377447	0.004525191
GHDC|41023|AA	-2.839017906	0.051986202	0.006751181	0.400310007	0.004525262
PET112|70845|ES	2.83832396	240323.4663	46.25560817	1248613319	0.004535113
ISCU|24244|ES	-2.83712166	0.094350035	0.018469913	0.481969193	0.004552226
SLC1A4|53774|AP	2.836031465	38.27715007	3.083044057	475.2251962	0.004567795
TXNRD1|24100|AP	2.835678532	33.81673927	2.966378904	385.5110529	0.004572845
SLC1A4|53775|AP	-2.835657125	0.026135234	0.002104926	0.32450093	0.004573151
RRAS2|14460|AP	2.83542214	27.45909501	2.7810277	271.1234767	0.004576517
AP1G2|26772|RI	-2.834796555	0.223604117	0.079380425	0.629863107	0.004585488
PAAF1|17746|AA	-2.83363454	8.60E-05	1.33E-07	0.055779105	0.004602193
HEPH|89332|ES	-2.832832453	0.000106614	1.90E-07	0.059712823	0.004613756
SOCS6|45787|AP	-2.828892416	0.130063381	0.031652502	0.534443789	0.00467094
UBA5|66822|ES	-2.824416402	0.305998574	0.134536964	0.695980674	0.00473668
RAP1A|4179|ES	-2.821958132	0.109723826	0.023645645	0.509155839	0.004773141
TRMT2B|89624|ES	2.8213789	36.18111701	2.991100638	437.6560291	0.004781769
CLEC7A|20318|ES	2.819739038	4.91761902	1.625268233	14.8793758	0.004806272
HM13|58892|ES	2.818201634	3.37202832	1.447973843	7.852748892	0.004829347
TIMELESS|22433|AA	2.817610397	21.14950806	2.531659648	176.6831855	0.004838248
RPS20|83891|AD	-2.817290285	0.035512092	0.003482457	0.362131831	0.004843073
MBNL1|67311|ES	2.815876398	69.09112547	3.623346714	1317.451515	0.004864438
ZFX|88718|ES	-2.815156641	6.62E-05	8.14E-08	0.053749039	0.004875346
SOD2|78301|AT	2.814381495	10.41186262	2.036625845	53.2286691	0.004887119
SOD2|78303|AT	-2.814352187	0.096045998	0.018787114	0.491019191	0.004887565
AFMID|43804|ES	2.811990104	4.498146633	1.577130335	12.82920167	0.004923602
ARAP1|17640|AP	-2.809923594	0.207791628	0.069448575	0.621717011	0.004955326
CRCP|79875|ES	-2.809848555	0.000302791	1.06E-06	0.086231145	0.004956482
HIGD1B|41896|AP	2.808599172	2.879722509	1.376561338	6.024287837	0.004975755
CCT3|8236|ES	-2.806447523	1.07E-07	1.46E-12	0.007904905	0.005009107
COLEC11|52579|AP	-2.805988835	0.489405981	0.29710187	0.806182117	0.005016243
C4BPB|9625|AT	2.804032192	2.724912467	1.352226939	5.491051641	0.005046787
STRADA|42971|ES	-2.802153583	0.000174103	4.09E-07	0.074160259	0.00507627
INPP5B|1852|AD	-2.799663124	0.376076161	0.18964376	0.745783983	0.005115596
TTC23|32615|ES	-2.799021953	0.046649271	0.005454159	0.398989922	0.005125765
SYS1|59530|AA	-2.798165684	7.23E-07	3.62E-11	0.014473329	0.005139374
CCDC43|41881|ES	-2.79706157	0.00285566	4.71E-05	0.173200929	0.00515697
FIP1L1|69310|AT	-2.797008024	0.262191754	0.102618225	0.669905521	0.005157825
CDV3|66837|AA	-2.796151185	0.003408293	6.35E-05	0.182854963	0.00517152
AMBRA1|15580|AA	-2.795873804	0.000419034	1.80E-06	0.097750889	0.005175961
IL6R|7834|ES	-2.794459632	0.051705928	0.006475149	0.412886725	0.005198653
AIMP2|97374|ES	2.79184325	4.966491023	1.612131088	15.30026514	0.005240874
TMC7|34280|AT	2.791309406	9.059776034	1.927798481	42.57682668	0.005249526
TMC7|34279|AT	-2.791250909	0.11038295	0.023487984	0.518750163	0.005250475
LOXL3|54105|AP	2.790795618	2.809702833	1.36009139	5.804337904	0.005257866
NIPA2|29683|ES	-2.790714039	0.177573012	0.052747534	0.597794292	0.005259191
ARL6IP4|25028|AA	-2.789711373	0.104285255	0.021303797	0.510491829	0.005275505
FIP1L1|69311|AT	2.788139034	3.78852078	1.485339652	9.663035439	0.005301179
ADIRF|12443|ES	2.786108501	45.86509043	3.109333203	676.5458648	0.005334501
RASA4|97681|ES	2.78547132	5.554202538	1.662177664	18.55948766	0.005344997
SOCS6|45786|AP	2.783337617	7.277748432	1.798862792	29.44394785	0.005380279
TCF3|46538|AA	-2.783228143	0.118243346	0.026291851	0.531780315	0.005382095
KBTBD3|18559|ES	-2.781696186	0.027457836	0.002180526	0.345757235	0.005407564
NDUFS4|72010|ES	-2.779745125	0.002342832	3.27E-05	0.167611651	0.005440158
UBTF|41828|AP	2.776117245	23.78565218	2.538774519	222.8465921	0.005501237
TSC2|33193|ES	-2.773580101	0.284642524	0.117132671	0.69170596	0.005544319
FLAD1|91163|ES	2.771871445	4.003262162	1.501249199	10.67518167	0.005573504
FAXDC2|74222|AP	2.771755705	2.371697176	1.287796786	4.367884401	0.005575486
UPP1|79643|AA	-2.769809431	0.050069541	0.00601686	0.416655684	0.00560891
SSH3|17168|AA	-2.768931019	0.122708059	0.027793276	0.541759366	0.005624054
API5|15451|ES	-2.766196121	0.017890589	0.00103404	0.309536679	0.005671442
HOXA1|79050|RI	-2.765716595	0.203485156	0.065843776	0.628855325	0.005679787
CEP170|10455|ES	-2.76469668	0.107479286	0.022110889	0.522448331	0.005697575
NOL8|86862|ES	-2.764658368	0.333665412	0.153239121	0.72652862	0.005698244
ALS2CL|64467|AD	2.763277281	11.66537319	2.042483104	66.62524231	0.005722413
SSR2|8150|AD	-2.763276255	3.09E-06	3.81E-10	0.025010992	0.005722431
CYHR1|85616|AT	-2.762078337	0.14133016	0.035256857	0.566534168	0.00574347
CYHR1|85617|AT	2.762017651	7.075351419	1.765044537	28.36222921	0.005744537
ATG4A|89852|ES	2.761697861	14.43976733	2.170829815	96.04939039	0.005750166
CCDC88A|53613|RI	2.76138683	1874.228839	8.909517316	394267.5698	0.005755646
TMEM170A|37610|AT	-2.760451793	0.002169721	2.79E-05	0.168888016	0.005772148
PLA2G4B|30116|AP	-2.758737477	0.051751974	0.006312879	0.424254416	0.005802513
INHBA|79310|AP	-2.756010967	0.096031217	0.018144506	0.50825273	0.005851104
ZDHHC4|78752|AA	-2.755133788	0.080242259	0.013335544	0.482831461	0.005866814
BBS9|79224|ES	-2.746180372	0.014023927	0.000667237	0.294753478	0.00602936
ASNS|80566|ES	-2.743878758	0.098549559	0.018828601	0.515811855	0.006071796
MTUS1|82817|AP	-2.74381254	0.150220464	0.038783686	0.58184742	0.006073021
RAPGEF1|87968|ES	2.74069418	14.33027911	2.134899675	96.19042144	0.006130954
PHF23|38858|ES	2.74022554	7403598179	646.0412041	8.48E+16	0.006139704
RNPS1|33261|ES	-2.736975563	0.093472399	0.017123156	0.510249925	0.00620069
SUN1|78541|ES	-2.734697672	1.81E-07	2.66E-12	0.012299064	0.006243759
PRPSAP1|43580|AD	-2.734372832	0.000711624	3.94E-06	0.128386025	0.006249923
S100A3|7716|AP	2.733583665	4.055126031	1.486170653	11.0647099	0.00626492
SLC2A11|61349|AA	-2.733509413	0.038510626	0.00372754	0.397867834	0.006266333
ZSCAN9|75720|AT	-2.73339573	0.058082386	0.007547626	0.446970127	0.006268497
ZSCAN9|75721|AT	2.733341618	17.21622046	2.237169751	132.488045	0.006269527
MRPS16|12136|AT	-2.732509357	0.007033967	0.000200932	0.246236449	0.006285389
MRPS16|12135|AT	2.73250529	142.1660335	4.061105574	4976.768199	0.006285466
CCDC176|28362|AT	-2.731479453	0.01734057	0.000945168	0.318139493	0.006305067
PPP2R3C|27210|ES	-2.729776749	0.085100327	0.014508684	0.499153872	0.006337723
SLC22A17|26733|AP	2.727950168	17.29435489	2.231007512	134.0626195	0.006372923
HHAT|9688|AP	-2.726689377	0.332362467	0.150571651	0.733636173	0.006397323
C17orf80|43221|ES	2.725650988	7.80789523	1.781269798	34.22458967	0.006417482
VEGFA|76341|ES	-2.723161867	7.66E-06	1.59E-09	0.036837422	0.006466037
CCDC138|54896|ES	2.721838777	11.90898024	2.000552667	70.89231531	0.006491981
PLEKHA1|13355|ES	2.721799928	7.270968635	1.742452663	30.34055732	0.006492744
PQLC3|52678|ES	2.719320794	233.3548405	4.584129946	11878.91317	0.006541613
YPEL5|53106|ES	-2.719260658	0.1561198	0.040937938	0.595374197	0.006542803
ERBB3|22351|AP	2.717769331	4.282331251	1.500146477	12.22438023	0.006572364
TNFRSF25|416|ES	-2.715683421	0.007901853	0.000240147	0.260004427	0.006613913
HPS4|61505|AA	-2.71395169	0.172260855	0.048369898	0.61347663	0.006648586
WDR20|29340|AT	-2.713199451	0.074589943	0.011437361	0.486446104	0.006663699
TATDN3|9758|ES	-2.712454147	0.008977624	0.00029796	0.270498702	0.006678702
CCT3|8237|ES	-2.711242688	0.02185554	0.001377928	0.346654285	0.006703154
AKAP10|39784|AA	-2.709878273	4.14E-05	2.80E-08	0.06125482	0.006730791
INSIG2|55092|ES	-2.709211451	0.000151452	2.61E-07	0.087828173	0.006744334
CCDC64B|33362|AP	2.707952364	2.475710492	1.284539464	4.771470718	0.006769974
NPIPB3|93938|ES	2.707375513	36.91376853	2.707982215	503.1887947	0.00678175
MCTP2|32582|AP	2.706367933	1.955568475	1.203183242	3.178441926	0.006802363
ZBTB10|84284|AP	2.706153907	3.896040525	1.454981371	10.43252654	0.006806749
NDRG2|26512|ES	2.704592408	6.26890231	1.657611598	23.70828982	0.006838825
FBXL20|40639|AP	2.704225449	3.570585326	1.419468859	8.981584546	0.006846382
PHF15|73405|ES	-2.704208369	0.163115466	0.043825319	0.607106939	0.006846734
GGA3|43389|AP	2.703629213	103.3989075	3.581924816	2984.801364	0.006858678
SLC9A3R2|33189|AA	-2.703596069	0.003677142	6.32E-05	0.213986541	0.006859362
TRNT1|62978|AD	-2.703446079	1.09E-06	5.16E-11	0.022902636	0.006862458
FAM134B|71598|AP	-2.699789361	0.460833447	0.262595504	0.808724684	0.006938339
C1QTNF1|43985|AP	2.699322779	3.193913477	1.374474791	7.421804579	0.006948075
CEP68|53782|AD	-2.699009718	0.198611163	0.06140853	0.642360176	0.006954615
ZNF584|52456|ES	-2.698063802	0.300026084	0.125126643	0.719396352	0.006974407
FAM76A|1340|AT	2.696553663	41.61521609	2.768945233	625.446177	0.007006111
FAM76A|1341|AT	-2.696481761	0.024032712	0.001599092	0.361186928	0.007007624
TOM1L2|39518|ES	-2.69633786	0.001447709	1.25E-05	0.167717276	0.007010652
RNF31|26872|ES	-2.692002627	5.05E-90	4.89E-155	5.22E-25	0.007102439
TNFRSF25|420|ES	-2.691802503	0.072493217	0.010726385	0.489938256	0.007106702
FOXO4|89391|RI	-2.689358716	1.34E-06	7.00E-11	0.02552104	0.007158944
EZH1|41112|ES	-2.686702055	0.066857081	0.009291503	0.481070651	0.007216129
ZBTB10|84283|AP	-2.686566821	0.256562472	0.095098696	0.692168291	0.007219051
SULT1A1|35815|AP	-2.685156729	0.067687335	0.00948124	0.483225349	0.00724958
ZNF544|52431|ES	-2.684370789	0.00416672	7.62E-05	0.227863878	0.007266647
NUBP2|33135|RI	-2.683822155	0.117871343	0.024732528	0.561756309	0.007278581
DMKN|49179|ES	2.683061633	6.869388798	1.68094436	28.07261416	0.007295154
SSFA2|56441|ES	-2.682349879	3.85E-06	4.26E-10	0.034818714	0.007310696
LAIR1|51878|ES	2.681402733	4.351438698	1.485340157	12.7479343	0.007331422
ABI3BP|65842|ES	2.679638277	9.670996626	1.839371365	50.84790245	0.007370176
CPNE1|59202|ES	-2.679547267	0.124509649	0.027126025	0.571504761	0.007372179
CEP89|48913|ES	-2.678739038	0.023347549	0.001493914	0.364885734	0.007389996
KRT15|40920|RI	-2.675604952	0.408112943	0.211672706	0.786857112	0.007459451
ATP6V0A1|41044|ES	2.675219279	360.1376777	4.825093323	26880.1323	0.007468039
ST3GAL6|65792|AT	2.674462791	32.68658563	2.538475217	420.8876545	0.007484908
DPY19L2|22846|AP	2.674422297	3.079094187	1.350453743	7.020470757	0.007485812
RAD54B|84560|ES	-2.672380231	0.010865415	0.000394142	0.299529483	0.007531525
CCDC64B|33364|AP	-2.672112734	0.383504228	0.18987612	0.774586571	0.007537532
FBXO7|61931|AP	2.671331048	11.75345979	1.927444004	71.67202617	0.00755511
FBXO7|61930|AP	-2.671331048	0.085081331	0.013952445	0.518821817	0.00755511
TMEM91|50054|AA	2.670551456	2.670388442	1.298685727	5.49091615	0.007572676
ELOVL6|70354|RI	-2.670469767	0.302191403	0.125556867	0.727317004	0.007574519
CAV2|81527|ES	2.670401995	23324454.78	91.23139928	5.96E+12	0.007576048
SHPK|38463|AT	2.669909478	50.20997544	2.833026353	889.8758145	0.00758717
SOCS2|23705|AP	2.669141176	3.029880296	1.342493808	6.838150431	0.007604548
FAM177A1|27183|AP	2.668838598	2.026607854	1.206373006	3.404535227	0.007611402
PHF10|78479|AA	2.667955214	111.1371466	3.490652085	3538.440684	0.007631443
DHX8|41707|ES	-2.667171596	0.000891473	5.12E-06	0.155350684	0.007649261
LAIR1|51883|AA	-2.666575059	0.039040328	0.003599642	0.423416334	0.007662849
BCL2L12|95310|ES	2.666469613	147.4765938	3.755113904	5791.927029	0.007665254
ZFX|88719|ES	-2.665775152	0.00116031	8.06E-06	0.167029817	0.007681105
RNASE1|26467|AA	-2.658567754	0.101749705	0.018873884	0.548535877	0.007847357
NEK6|87528|AP	-2.657112334	0.079582976	0.01230362	0.514763151	0.007881318
SAMD8|12270|AD	-2.655876796	0.206640103	0.064544886	0.661557172	0.007910251
PI4K2A|12728|AP	-2.65472867	0.381452539	0.187249875	0.777068818	0.007937222
PI4K2A|12729|AP	2.65472719	2.621557012	1.286886655	5.340455695	0.007937257
MMS22L|77044|ES	-2.654382021	0.012680015	0.000504064	0.318972673	0.007945382
ENSA|7492|AT	-2.650439934	0.000426399	1.37E-06	0.132440499	0.008038702
CNOT10|63826|ES	-2.64709518	4.72E-06	5.37E-10	0.041442205	0.00811865
C21orf58|60931|RI	2.647063185	2.775639222	1.303418579	5.910743651	0.008119418
AMT|64868|ES	-2.646883739	0.047568066	0.004987631	0.453666461	0.008123728
GOLGA2|87727|ES	2.646507186	4.872032165	1.508003009	15.74048412	0.008132778
RPL13A|264941|ES	-2.645561826	0.133737783	0.030125873	0.59370211	0.008155538
NPIPB3|34444|AP	-2.644925555	0.115019787	0.023162141	0.571171361	0.008170889
TTLL3|63223|ES	-2.644755402	0.114165035	0.022860925	0.570128078	0.008174999
MXI1|13079|AP	2.644602591	4.072697038	1.438424845	11.53126715	0.008178691
TRPC4AP|59059|ES	2.644476266	25.07911301	2.302536125	273.1604957	0.008181744
RNF170|83744|AT	-2.643827398	1.07E-07	7.24E-13	0.015725573	0.008197445
TMEM68|83871|ES	-2.643180064	9.18E-07	3.06E-11	0.027507906	0.008213134
CEP164|18915|ES	2.642963316	4.562850696	1.480338448	14.06408548	0.008218394
BCL2L1|58900|AP	2.639636664	24.1614063	2.27057723	257.1035887	0.008299495
BCL2L1|58899|AP	-2.639610925	0.041390296	0.003889717	0.440432214	0.008300126
KRT15|40921|RI	-2.638823293	0.473704448	0.271952677	0.825128499	0.008319433
PRKAB1|24705|AP	2.638189788	3.621253088	1.392103209	9.419900653	0.008334992
PRKAB1|24704|AP	-2.638181501	0.276148146	0.106158344	0.71834013	0.008335196
CDK17|23829|ES	-2.635916876	0.002827379	3.60E-05	0.222041674	0.008391028
ZNF468|51633|ES	2.63509378	3.946494637	1.42152217	10.95643828	0.008411404
ZSCAN2|32306|ES	-2.632433605	0.000614847	2.50E-06	0.151242152	0.008477559
TIMM50|49835|ES	2.63092098	3822.315416	8.195802761	1782631.374	0.008515383
PSPC1|25402|AT	-2.630171202	0.246090538	0.086566132	0.699587141	0.008534188
SMAD4|45557|AP	2.630073774	5.0487434	1.510644519	16.87346666	0.008536634
ZNF276|38136|AP	-2.627275059	0.265534292	0.098744045	0.714052784	0.008607173
PEX11B|7280|AP	-2.626399938	5.38E-07	1.13E-11	0.025653676	0.008629336
NUP54|69589|ES	-2.624139813	0.000487763	1.64E-06	0.145136976	0.008686812
TRAPPC4|19059|AT	-2.623645486	0.012416126	0.000467865	0.329497194	0.008699428
TRAPPC4|19060|AT	2.623607669	80.53648495	3.034746293	2137.28753	0.008700394
ABI1|11050|ES	2.62282533	67.73062988	2.901954658	1580.809752	0.008720397
KIAA1715|56101|ES	2.622752873	17939.53056	11.88418107	27080263.66	0.008722251
GDPD5|17855|AP	2.622673286	2.982879154	1.318053835	6.750534623	0.008724289
URGCP|79353|AP	-2.622381791	0.275818541	0.105328601	0.722271696	0.008731755
TYW5|56728|AD	-2.622369702	0.139949921	0.032186299	0.608519191	0.008732065
GRB7|40691|AP	-2.62133765	0.185574346	0.052673435	0.653798976	0.008758547
ATXN2L|35855|ES	2.620003555	4.908651345	1.493032894	16.13819636	0.008792885
FOXJ3|2064|AP	2.618034423	3.052708394	1.323825505	7.039468952	0.008843788
SLC25A26|65549|ES	-2.617839283	0.223089477	0.072558523	0.685914109	0.008848847
NCK2|54843|AP	-2.616770678	0.000427929	1.28E-06	0.142717691	0.008876595
PIGN|45697|ES	-2.616303628	0.232402664	0.077887952	0.693444839	0.008888748
HIGD1B|41897|AP	-2.615473791	0.365840848	0.172200893	0.777228987	0.008910376
CDK2AP1|25065|AP	-2.613857152	0.004208664	6.96E-05	0.254475649	0.008952646
ISYNA1|48436|ES	-2.613440556	9.33E-05	8.86E-08	0.098237342	0.008963567
NAV1|9387|AP	-2.608754527	0.485630553	0.282245414	0.835574368	0.00908724
RBM10|88905|AD	2.608083696	17.76678106	2.044245278	154.4132266	0.009105069
RNPS1|33256|AD	-2.605936697	0.337090512	0.148784478	0.763722228	0.009162339
HIVEP1|75358|ES	-2.605890933	7.85E-05	6.42E-08	0.096052825	0.009163564
RNF145|74402|AP	-2.602608838	0.055306083	0.006251504	0.489284313	0.009251744
CARM1|47599|ES	2.602561191	11.70116822	1.835506786	74.59375187	0.00925303
PPP1CA|17183|ES	2.601256405	3.960916647	1.404027616	11.17418241	0.0092883
TLE3|31412|AD	-2.600635347	0.022668285	0.00130612	0.39341809	0.00930513
BTN2A2|75651|ES	-2.600546583	0.035522958	0.002871215	0.439493554	0.009307538
ZNF439|47755|AP	-2.600479832	0.278290924	0.106125988	0.729753759	0.009309349
RRNAD1|8315|ES	-2.600114089	7.81E-07	1.95E-11	0.03136192	0.009319277
FAM21A|11558|ES	-2.600074359	1.66E-06	7.30E-11	0.037761906	0.009320356
DZIP1|26124|ES	-2.599765294	0.000122897	1.38E-07	0.109052877	0.009328754
BMP4|27568|AD	-2.598625975	0.253405459	0.089981981	0.713635393	0.009359769
ZNF439|47756|AP	2.597410013	3.579243496	1.367443034	9.368568695	0.009392973
ZNF18|39297|AA	2.596213646	5.21374101	1.498823855	18.13628415	0.009425744
SHROOM1|73309|ES	-2.595729233	0.003176962	4.13E-05	0.24444112	0.009439042
SH3BGR|60639|AP	2.594431125	2.107408684	1.199976212	3.701049502	0.00947476
DDX11|20957|AP	-2.594255681	0.080217794	0.01192465	0.539629648	0.009479596
DDX11|20956|AP	2.594255681	12.46606208	1.853122793	83.85990624	0.009479596
PHTF1|4284|RI	-2.593821388	0.375117063	0.178811464	0.786933947	0.009491578
ADAMTSL4|7485|AP	2.59293645	3.514549882	1.359109719	9.088347101	0.009516035
FAM110A|58470|ES	-2.591382221	0.280943205	0.107544229	0.733922085	0.009559126
MBP|46226|RI	-2.591166285	1.51E-06	5.99E-11	0.038213212	0.009565126
RRAS2|14457|AP	-2.590519983	0.052787954	0.005701856	0.48871247	0.009583106
RBM4B|17110|ES	-2.589704193	0.001642651	1.28E-05	0.210330454	0.009605843
HID1|43339|AD	-2.589360893	0.000567038	1.98E-06	0.162517187	0.009615426
SHMT2|22540|AP	2.588037298	13.84228585	1.892134593	101.2659872	0.009652453
ATP5SL|50073|ES	2.58798297	3.240946083	1.330219706	7.896238092	0.009653975
RNF31|26871|AD	-2.586806725	0.015248527	0.000640769	0.362872746	0.009686991
USHBP1|48249|AA	-2.585632952	0.013927807	0.000545641	0.355515499	0.009720038
TMEM62|30214|ES	2.58554531	11.2087126	1.79450022	70.01126925	0.009722509
FCGR3A|8674|AP	-2.5853757	0.122561647	0.024959708	0.601824251	0.009727294
SH3KBP1|88643|AP	2.584938651	2.608508355	1.260879004	5.396485955	0.009739633
NOL8|86864|ES	-2.584527131	0.032085477	0.002363603	0.435554414	0.009751263
KIAA1328|45278|AP	-2.584494986	0.392570803	0.193180725	0.797759901	0.009752172
RAB30|18041|AP	2.583948715	4.10024001	1.405996434	11.95733341	0.009767632
ZFYVE19|30051|AD	2.583151934	387.3034617	4.210851687	35623.19041	0.00979022
SLC22A17|26734|AP	-2.582116621	0.071818145	0.009728705	0.53016778	0.00981964
C1QTNF1|43983|AP	-2.581929895	0.405616604	0.204471689	0.804633788	0.009824954
WDR55|73714|RI	-2.581310146	9.73E-06	1.52E-09	0.062173826	0.009842611
CANT1|43976|ES	-2.581129169	0.36102189	0.166551844	0.782559964	0.009847773
EPB41L1|59266|AP	-2.580921851	0.300195948	0.120377033	0.748627915	0.009853689
PTTG1|74423|RI	2.580585526	3.263833926	1.329075798	8.015052197	0.009863292
GRB7|40693|AP	2.578259464	4.871076779	1.461841093	16.23116842	0.009929941
COL1A1|387732|ES	-2.578092322	0.029778361	0.002059217	0.430625297	0.009934745
ASXL1|58952|AT	2.577670664	11.26285528	1.786547097	71.00395468	0.009946875
ASXL1|58951|AT	-2.577665374	0.088790487	0.014084522	0.559745682	0.009947027
SUFU|12961|AT	2.576348477	127.8389125	3.191637156	5120.502975	0.009984996
VAV1|47089|ES	-2.575118981	0.001764098	1.42E-05	0.219906497	0.010020561
H2AFY|96931|ME	-2.574619164	0.135719524	0.029672522	0.62076925	0.010035051
GDPD5|17859|AP	-2.574493178	0.309185678	0.126509434	0.75564154	0.010038707
INHBA|79309|AP	2.573684669	7.669864158	1.6254979	36.19002904	0.010062193
NGFRAP1|89733|ES	2.573082934	11731.48151	9.325087339	14758859.99	0.010079705
MACROD2|58715|AP	-2.572770481	0.379190993	0.181145503	0.793758646	0.010088809
TATDN1|85094|ES	-2.572132142	0.002994235	3.57E-05	0.250816068	0.01010743
ST3GAL3|2192|AP	-2.571223571	0.293414094	0.115228055	0.747142964	0.010133988
GGA3|43390|AP	-2.571180624	0.012632082	0.000451091	0.353741398	0.010135245
RAB3GAP1|55431|RI	-2.570412245	3.63E-05	1.49E-08	0.088188307	0.010157756
ATXN2L|35836|AD	2.56925278	2.38809389	1.229287572	4.639266321	0.010191808
FNTA|83754|AD	2.567616165	7.154312875	1.593096532	32.1287453	0.010240047
NECAP1|20177|ES	2.567606869	875.5845529	4.969541177	154269.4349	0.010240322
CAPN1|16802|AP	2.565944774	27.72665479	2.191587207	350.7811068	0.010289521
SEPT9|43740|ES	-2.565550786	5.49E-12	1.37E-20	0.00219755	0.010301214
TSEN2|63432|ES	-2.564831601	0.155573314	0.037535069	0.644811821	0.010322589
SEC14L1|43701|AP	2.564510776	3.937314359	1.381369686	11.22251669	0.010332137
RCHY1|69523|ES	2.558283816	444.236355	4.161136789	47425.96773	0.01051902
MOK|29374|RI	2.557704813	4.862597406	1.44717991	16.33857226	0.010536549
STAU2|84164|ES	-2.557603266	0.00247178	2.48E-05	0.245935031	0.010539626
VWA2|13198|AT	-2.557262858	0.27805762	0.104256422	0.741594987	0.010549946
TBC1D19|68990|ES	-2.553109312	0.038232246	0.003120279	0.468453215	0.010676598
ZNF121|47359|ES	2.551602009	5.213360734	1.466484765	18.5335237	0.010722893
MRPS12|49738|AD	-2.549692509	0.094611612	0.015443537	0.579618336	0.010781797
MICALL2|78570|AP	2.546087495	4.662620236	1.425352747	15.25238402	0.010893788
CLU|83168|AP	-2.544351897	0.012408395	0.000421956	0.364891483	0.010948073
D2HGDH|58419|ES	2.54247326	5.815463304	1.496838289	22.59403283	0.011007102
IFI6|1338|AD	-2.542295187	0.000416538	1.03E-06	0.168154039	0.011012712
ZNF585B|49465|ES	-2.542249012	0.004448445	6.84E-05	0.289292993	0.011014167
ISYNA1|48437|ES	-2.540875918	0.000199773	2.80E-07	0.142627731	0.011057515
NPIPB3|34463|ES	2.539215535	9.639551317	1.676815391	55.415134	0.011110135
FANCD2|63304|AT	2.538871807	117.6905621	2.965963739	4670.005982	0.011121056
VWA2|13197|AT	2.538811605	3.563012666	1.336023354	9.502123762	0.01112297
MSMO1|71042|ES	-2.537855676	0.002461429	2.38E-05	0.254654176	0.011153397
RNMTL1|38277|ES	-2.537137835	0.007917871	0.000188479	0.332624416	0.011176294
NEDD4L|45651|AP	-2.536587739	0.477023924	0.269249814	0.845132707	0.011193869
NFIC|46680|ES	-2.535360261	0.120228459	0.023377903	0.618313897	0.011233174
FAM134B|71599|AP	2.534731774	2.06203288	1.178334726	3.608464985	0.011253346
TTBK2|30200|ES	-2.534567841	0.006662611	0.000138256	0.321074133	0.011258612
RAVER2|3279|AT	-2.533785392	7.36E-07	1.33E-11	0.040840295	0.011283781
TACC1|83437|AP	2.533302246	3.267333338	1.307291759	8.166093808	0.011299348
SPP1|69875|ES	-2.532582777	0.092124015	0.014551299	0.583235508	0.011322563
DNAJC2|81187|AT	2.532108321	21.87084497	2.007937895	238.2214416	0.011337896
DNAJC2|81185|AT	-2.531978123	0.045728785	0.004198206	0.49809884	0.011342107
TCF4|45614|AA	-2.531176304	0.027701668	0.001723823	0.44516317	0.011368069
TMEM54|1645|ES	2.530386289	23.40518493	2.035553743	269.1172777	0.011393701
ZNF7|85659|AA	-2.528624036	1.44E-05	2.55E-09	0.081544034	0.011451062
C17orf62|44342|AA	2.528531062	49156647.26	53.64558694	4.50E+13	0.011454095
GNB2|80984|AP	-2.528527885	0.082564674	0.01194422	0.570730046	0.011454199
SUV39H2|10833|ES	-2.5279779	0.212606419	0.06400889	0.706175188	0.011472157
ABHD14B|65145|ES	2.527906914	62.50874143	2.532168767	1543.081491	0.011474477
SEPT8|73299|AT	-2.525312464	0.03195539	0.002207395	0.462602822	0.011559546
SKA2|42733|ES	-2.522936834	0.007072951	0.000151024	0.331249983	0.01163793
TRNT1|62977|AT	-2.522520543	0.036732694	0.002819151	0.47861594	0.011651714
EXOC7|43569|ES	-2.52114249	0.318177696	0.130629028	0.774996549	0.011697447
CCDC106|52131|AA	-2.519383166	0.287189551	0.108804988	0.758033613	0.011756065
INTU|70536|RI	-2.517965605	0.00651016	0.000129333	0.327698276	0.011803485
SLC5A6|52951|ES	2.517305907	4451408.251	29.64864043	6.68E+11	0.011825611
MICAL1|77197|AP	2.516250156	7.922302264	1.580213539	39.71796952	0.011861096
MICAL1|77198|AP	-2.516240003	0.126226557	0.025177578	0.632830673	0.011861438
FBL|49850|ES	-2.515985911	0.033603362	0.002390168	0.472429495	0.011869993
EPB41L1|59271|ES	-2.514205982	0.193981109	0.054016711	0.696611653	0.011930073
ARHGEF16|307|AP	2.513818515	2.214295988	1.19141675	4.115358225	0.011943188
MTPAP|11118|AP	-2.512973072	0.000790796	3.01E-06	0.207674361	0.011971847
FXYD3|49042|ES	2.512933565	4.704565783	1.406007178	15.74169716	0.011973188
GNB1|231|ES	-2.512020007	0.000437642	1.05E-06	0.182739714	0.012004228
CCDC82|18408|AP	2.509987206	2.914546538	1.264163486	6.719527671	0.012073554
HHAT|9689|AP	2.509523644	2.867342632	1.259456835	6.527936125	0.012089412
SLC6A6|63530|AA	-2.509151911	0.007911062	0.000180506	0.346719601	0.012102143
GZF1|58840|ES	-2.508242589	0.002331206	2.04E-05	0.265813792	0.012133334
CCDC82|18406|AP	-2.505925206	0.179542998	0.046862976	0.687871134	0.012213145
ACTR10|27684|ES	-2.50451496	0.003100996	3.38E-05	0.284828101	0.012261942
TBC1D25|88993|ES	-2.504164328	0.053113707	0.005338865	0.528401774	0.012274101
MTMR1|90356|ES	2.503281448	3.075536139	1.276143059	7.412117687	0.012304765
OPHN1|89352|ES	-2.503100847	0.123580267	0.024039876	0.635281236	0.012311046
ICA1|78788|AT	-2.501959157	0.08619558	0.012634966	0.588025173	0.012350817
ICA1|78786|AT	2.501881319	11.60045722	1.700472038	79.13720704	0.012353533
PSPC1|25404|AT	2.501357104	10.46496126	1.662309022	65.88150138	0.012371836
PPP3CB|12154|AT	-2.501107446	0.196175919	0.05474389	0.70300066	0.012380561
PPP3CB|12153|AT	2.501101719	5.097450949	1.422468729	18.26683824	0.012380761
POLE|25276|AA	-2.497345675	0.050284301	0.004811629	0.525500032	0.012512692
EGFR|79737|AP	-2.497298967	0.12930733	0.025965411	0.64394844	0.01251434
GPS1|44284|ES	-2.496758111	0.012231701	0.000385618	0.387986365	0.012533442
CBLL1|81372|ES	2.495500608	7.995736368	1.562263263	40.92255229	0.012577954
B3GALNT1|67504|ES	2.495321357	5.206243361	1.424709612	19.02490845	0.01258431
DPH6|29892|AT	2.49341019	21.84635313	1.934416425	246.7220289	0.012652259
DPH6|29893|AT	-2.493325318	0.04577978	0.004053688	0.517007841	0.012655284
ENDOV|44066|ES	2.493091076	3.317177077	1.292296322	8.514814729	0.012663636
TTLL3|63219|ES	-2.492623996	0.110682429	0.019607963	0.624776782	0.012680305
DOCK8|85708|ES	-2.492053907	0.156751901	0.036497192	0.673234211	0.012700676
FLNA|205372|ES	-2.49191665	0.107536193	0.018614209	0.621247597	0.012705585
MGAT1|75023|RI	-2.491836716	0.000447801	1.04E-06	0.192835643	0.012708445
FGFR1|133022|ME	-2.491815651	0.250408712	0.08426569	0.744128759	0.012709198
TIA1|53873|ES	2.490788231	5.910280614	1.460297136	23.92075973	0.012746007
HK2|54143|AP	-2.490184675	0.000105558	7.83E-08	0.142332712	0.012767673
FOPNL|34201|ES	2.489577163	7045768.157	28.62692688	1.73E+12	0.012789515
CARD8|50713|ES	-2.488885342	0.367121976	0.166764793	0.808195443	0.012814429
CD99L2|90358|AT	2.488870684	1244.415321	4.546813023	340583.4994	0.012814957
ACAD9|66685|AD	2.48867696	8.191106197	1.563281761	42.91882781	0.012821941
CHTF8|37262|RI	2.488629042	1728.445585	4.872843632	613096.6572	0.012823669
FAM104B|89282|AD	2.487774896	5.333200129	1.426392642	19.94052884	0.012854507
SMG7|9184|ES	-2.48685398	0.160800284	0.038083575	0.678947055	0.012887828
ZNF821|37501|ES	-2.486600817	0.068503763	0.008279664	0.566782098	0.012897002
CDC42SE2|73223|RI	-2.486419295	0.252781998	0.085496872	0.74738101	0.012903583
BCAR3|3796|AP	2.485995054	2.95983634	1.258111712	6.963317389	0.012918976
CD74|74077|ES	2.485776459	102.048037	2.66023107	3914.623044	0.012926914
GIT2|24373|ES	-2.485741835	0.283343145	0.104826445	0.765869129	0.012928171
IPO8|20936|AP	-2.48298342	0.008338541	0.000190583	0.364833931	0.013028715
MXI1|13080|AP	-2.482376382	0.281990847	0.103792804	0.76613055	0.013050934
RUSC1|8079|AA	2.48215947	206.2167283	3.068218746	13859.94368	0.013058882
CLUH|38412|AP	-2.47959562	0.008318942	0.000188805	0.366541465	0.013153146
PPA2|70244|ES	-2.478887684	1.27E-08	7.22E-15	0.02222339	0.01317928
NBPF15|91080|ES	2.478299894	4.922383979	1.395623778	17.361315	0.013201014
IQGAP3|8282|RI	-2.478256883	1.23E-07	4.23E-13	0.035895494	0.013202605
FBXL20|40638|AP	-2.478148822	0.309251704	0.122236456	0.782390295	0.013206605
KIAA0586|27712|AP	-2.477272199	0.250047695	0.083512523	0.748676332	0.013239089
KIAA1217|10994|AP	2.476459169	2.999713973	1.257478907	7.155813008	0.01326928
MAP3K13|67993|ES	-2.476116957	0.00272752	2.55E-05	0.292064802	0.013282006
FNBP1|87881|AA	2.473809026	8.431440473	1.557122801	45.65419528	0.013368113
EGFR|79738|AP	2.472936911	7.555406179	1.521181892	37.5261912	0.01340078
FADS2|16291|AP	2.472081811	4.180751338	1.344929098	12.9959875	0.013432877
FAM219B|31797|ES	2.471987503	1593444.014	19.2615795	1.32E+11	0.013436421
RAB7L1|9570|RI	2.471982931	3.168092433	1.269783485	7.904347301	0.013436593
TMEM256-PLSCR3|38937|ES	2.471675365	5.907662151	1.444462649	24.16156078	0.013448158
DRG2|39561|ES	-2.469354115	0.370484772	0.168460013	0.814786634	0.01353572
FAM193A|68585|AD	-2.468573922	0.000415066	8.57E-07	0.20100986	0.013565263
ANKHD1|73655|ES	-2.467451796	2.71E-05	6.40E-09	0.115033282	0.013607854
MGRN1|33784|ES	2.467342557	7.540500717	1.515048477	37.52959191	0.013612007
SPHK2|50784|AT	2.466496764	8.34761194	1.546168719	45.06793098	0.013644196
MLK4|10327|AP	2.465842859	2.169209083	1.172178535	4.014292964	0.013669129
PNKD|57463|AT	2.465731406	3.159724919	1.266156444	7.885172182	0.013673382
PNKD|57462|AT	-2.465694232	0.316489257	0.126822887	0.789805784	0.013674801
CBWD6|86492|ES	2.465554101	28.57487897	1.988686303	410.584468	0.013680151
HMGA1|75775|ES	2.465132244	3.198771871	1.269065121	8.062739503	0.013696269
IDUA|68443|ES	-2.464821999	0.000330271	5.63E-07	0.193631658	0.013708133
C7orf43|80907|AA	-2.464216761	0.211395622	0.061418275	0.727602805	0.013731304
APC|72984|AP	2.463755755	3.088574064	1.259349619	7.574774794	0.013748977
SEPT11|69616|AT	-2.463283313	0.011310212	0.000319649	0.400191928	0.013767108
DNAJC11|495|ES	-2.463171389	1.19E-07	3.65E-13	0.038461184	0.013771407
SOGA2|44574|AP	-2.461773317	0.276961154	0.09965415	0.769736941	0.013825202
LINC00999|107640|ES	2.461300042	4.339019459	1.348430919	13.96222053	0.013843454
SEPT8|73300|AT	2.460714918	31.32165012	2.015587311	486.729481	0.01386605
EIF3B|78612|AA	2.460222709	127.1123823	2.678323465	6032.713354	0.013885082
C3orf18|65060|AP	2.458872676	2.660009292	1.219577445	5.801722116	0.013937404
NUPL2|78962|ES	2.458836616	45.73289329	2.171917397	962.97287	0.013938804
PMM1|62439|ES	-2.458030704	0.113702658	0.020084863	0.643683465	0.013970123
PIGV|1303|AD	2.457501796	4.08220976	1.329474086	12.53460801	0.013990711
ATXN2L|35835|AA	2.457330678	2.432971616	1.197166631	4.944466988	0.013997378
KTN1|27628|AP	2.457283429	81.31048491	2.4354918	2714.603661	0.013999219
ELP2|45228|ES	2.455788425	22.26191438	1.87099784	264.8815628	0.014057589
EDNRB|26097|AP	-2.454227791	0.108025296	0.018268039	0.638791292	0.014118751
ST3GAL3|2194|AP	2.451870606	3.202193958	1.2630061	8.118762169	0.014211576
ATG13|15593|ES	2.451557687	3.33357286	1.273079346	8.728998744	0.014223938
MLK4|10328|AP	-2.448169374	0.457858066	0.244972653	0.855744535	0.014358414
CD99|98274|ES	2.448083291	4.119889253	1.326175554	12.79882396	0.014361845
TBCE|10351|AD	2.447655737	52.12489525	2.198460628	1235.866893	0.014378897
CPNE1|59179|AP	2.44685358	3.794365186	1.303888862	11.04174411	0.014410937
CPNE1|59180|AP	-2.446846913	0.263549425	0.09056559	0.766939184	0.014411204
MDFI|76117|ES	-2.444162205	0.000161373	1.47E-07	0.177319473	0.014518897
ACIN1|26707|RI	-2.443987804	0.25917226	0.087763496	0.76535534	0.014525918
TMEM108|66827|AT	2.44289377	3.058807558	1.247348003	7.500956953	0.014570025
AGPAT4|78368|AT	-2.4423233	0.102062739	0.016348705	0.637163791	0.014593071
AGPAT4|78366|AT	2.442246947	9.797243257	1.569344685	61.16309333	0.014596158
IL11RA|86209|AP	-2.442045976	0.489811556	0.276216191	0.868578196	0.014604287
ZFP64|59811|AT	-2.441664514	0.261918655	0.089355055	0.767739243	0.014619726
MUS81|16927|AP	2.441042007	35.75129543	2.023583505	631.6295431	0.014644951
EYA2|59705|ES	-2.440847549	6.65E-07	7.30E-12	0.060682381	0.014652839
MUS81|16926|AP	-2.440818474	0.027982288	0.001583941	0.49434206	0.014654019
ERLIN2|83348|AT	-2.440674799	0.18903095	0.049608784	0.720289784	0.014659849
ERLIN2|83347|AT	2.440672899	5.290180397	1.38833081	20.15802604	0.014659926
NDUFC1|70618|AP	2.440441939	3.595039542	1.286494079	10.04614752	0.014669304
NDUFC1|70617|AP	-2.440348937	0.278177591	0.099547415	0.777345875	0.014673081
POLK|72525|ES	-2.440347325	3.02E-06	1.12E-10	0.081944156	0.014673147
SCAF8|78223|ES	-2.440115089	0.122784004	0.022778061	0.661861052	0.014682583
MICALL2|78571|AP	-2.439381646	0.232501197	0.072005952	0.750726919	0.014712421
HLF|42576|AP	-2.438440254	0.126693479	0.024075101	0.666715281	0.014750797
ERMAP|2123|AP	2.438359399	4.451193	1.340380895	14.78170809	0.014754097
DRG2|39558|ES	-2.437677635	2.62E-06	8.53E-11	0.080576585	0.01478195
C19orf54|49966|RI	-2.437166361	0.120279336	0.021901941	0.660540481	0.014802867
TANK|55744|ES	-2.436065183	0.326090423	0.132369713	0.803317934	0.014848009
TMEM108|66828|AT	-2.435939315	0.328090062	0.133831908	0.804315577	0.014853176
NEDD4L|45649|AP	2.435220711	2.056975526	1.151144053	3.675602809	0.014882709
ZNF267|36293|ES	-2.434607212	0.157487333	0.035562614	0.697425108	0.014907963
AFMID|43810|ES	2.434518433	5.641088357	1.401074562	22.71247992	0.01491162
UQCRQ|73319|AD	2.434479922	2.975873056	1.236842533	7.160022564	0.014913207
ZFX|88717|ES	-2.434302886	0.00953234	0.000224991	0.403863483	0.014920504
TMEM234|1570|RI	-2.43370098	0.134133134	0.026601332	0.676345751	0.014945336
IRF9|26880|ES	2.433615638	6.692205656	1.447703236	30.93563336	0.01494886
CEP63|66877|AT	-2.433368332	0.215256427	0.062471739	0.741700651	0.014959075
CEP63|66878|AT	2.433333128	4.64552117	1.348223003	16.00689714	0.01496053
FGFR2|13300|AT	-2.431972479	0.195020627	0.052233071	0.728141093	0.015016848
TULP3|19734|ES	-2.431721603	0.039624261	0.002937108	0.534567284	0.015027253
PREPL|53450|AD	2.43125031	3.032640052	1.239934336	7.417252203	0.015046815
IL1R1|54771|AP	-2.430377339	0.36572183	0.162501135	0.823086293	0.015083111
TCFL5|60086|AT	-2.428987328	0.102975763	0.0164477	0.644710683	0.015141062
TCFL5|60087|AT	2.428859794	9.70994562	1.550900735	60.79244262	0.015146388
DPY19L2|22847|AP	-2.428716927	0.364362274	0.161321692	0.822951114	0.015152358
CCDC106|52128|AA	-2.428565267	0.31273445	0.122393764	0.79908349	0.015158696
ZBTB33|89989|ES	2.428271348	5.597689331	1.393985281	22.47808945	0.015170988
LTBP3|16865|ES	2.427436921	3.675464365	1.28489358	10.51374098	0.015205931
ETV4|41709|AP	2.427424969	3.113671999	1.244491527	7.790292745	0.015206432
ACVR2A|55521|RI	-2.427134015	3.89E-05	1.07E-08	0.141607624	0.015218633
SH2D3C|87662|AP	-2.425801571	0.307376365	0.118502056	0.797287685	0.015274619
MCTS1|90006|AP	2.425650991	26022672.92	26.52353758	2.55E+13	0.015280958
ZNF254|48840|ES	-2.425109601	0.106880884	0.017541264	0.651237177	0.015303766
MDK|15571|RI	-2.42476514	0.003073827	2.86E-05	0.329925144	0.015318293
BCL11A|53658|AT	-2.424370304	0.219111464	0.064214151	0.747651921	0.01533496
BCL11A|53659|AT	2.424370304	4.563887183	1.337520806	15.57289137	0.01533496
RNF14|73838|AP	-2.422775562	6.26E-05	2.49E-08	0.157409427	0.015402439
RBM4B|17105|AP	-2.422499584	0.052578811	0.004851334	0.569849674	0.015414143
PABPC1L|59500|RI	-2.422475919	0.000697557	1.95E-06	0.249666098	0.015415147
SEPT11|69618|AT	2.420779734	231.7929311	2.819789443	19053.89178	0.015487258
PCDH18|70599|RI	-2.419965084	0.000792312	2.44E-06	0.257349917	0.015521997
DTNBP1|75419|AA	-2.418644903	0.01269746	0.000369022	0.436899681	0.01557844
IFI6|1337|AD	-2.417889749	0.052806646	0.004867299	0.572913601	0.015610806
STAU2|84152|AP	-2.417513157	0.024117849	0.00117718	0.494122105	0.015626969
TIMM9|27711|ES	-2.417244504	0.066347925	0.007354187	0.598576994	0.015638508
PSMD5|87396|AT	-2.417230013	1.76E-05	2.46E-09	0.126095718	0.015639131
RBM4B|17104|AP	2.416650021	18.90471577	1.742768223	205.0693108	0.01566407
SYNJ2|78244|AP	2.41659303	3.063030501	1.23555211	7.593492633	0.015666522
SEC14L2|61748|ES	2.4163598	23.07863147	1.809170941	294.4018272	0.015676562
EMID1|61575|ME	2.416189156	4.97538002	1.353863346	18.28427249	0.015683911
ST5|14261|AP	-2.416172257	0.226583338	0.067951372	0.755540439	0.015684639
TACC2|13345|ES	-2.416126947	0.26280244	0.088885787	0.77700974	0.015686591
TMEM145|50152|AT	2.415858447	2.583062974	1.196116887	5.578229351	0.015698163
TMEM145|50151|AT	-2.415851763	0.387138553	0.179269033	0.836040989	0.015698451
MGLL|66625|ES	-2.415744515	0.03292756	0.002064488	0.525178243	0.015703075
CREB3L4|7774|AD	-2.415285352	0.138510694	0.027849106	0.688898687	0.015722887
KDM2B|24876|AT	-2.414411664	0.031070006	0.00185549	0.52026432	0.015760644
C10orf68|11182|ES	-2.413621866	0.058880015	0.005903769	0.587227619	0.015794845
CAPN10|58269|AT	-2.413528376	0.027016716	0.001438805	0.507298062	0.015798898
KIF3C|52881|RI	-2.413368709	0.011264697	0.000294759	0.430499243	0.015805821
N4BP2L2|25599|ES	-2.412855358	0.000349423	5.44E-07	0.224486054	0.015828099
FKBP2|16603|AP	2.412829455	11.02329324	1.569032978	77.44451238	0.015829224
SLC39A11|43199|AT	2.410691279	6286.271379	5.130812077	7701940.211	0.01592232
NR2C2AP|48613|RI	-2.408669226	0.00021422	2.21E-07	0.207245206	0.016010802
SLC39A1|7763|AP	-2.408347002	0.002243496	1.57E-05	0.321217072	0.016024942
PSMG4|75184|AA	-2.407413369	0.452995746	0.237742962	0.863138676	0.016065973
ZDHHC20|25453|ES	2.405074719	3.54765059	1.264091073	9.956422429	0.016169159
SLC52A2|114728|ES	-2.404918077	0.102312729	0.015960282	0.65587152	0.016176092
KRTCAP3|53016|ES	2.404689096	13.32510104	1.614349106	109.9875592	0.01618623
DFNB31|87322|AP	-2.40199291	0.247965986	0.079475225	0.773664125	0.016306024
HAUS3|68550|RI	-2.40004898	0.262610075	0.088125326	0.782567898	0.016392878
TGFA|53894|AP	2.399728328	18.36772572	1.704690696	197.9088341	0.016407244
S100A3|7715|AP	-2.399431597	0.29044057	0.105793318	0.79736344	0.016420547
SYDE1|48050|AP	2.397665974	7.022973968	1.427365735	34.554678	0.016499904
METTL21B|22752|ES	-2.397622654	0.181717882	0.045079993	0.732506514	0.016501855
COL1A1|316148|ES	-2.396872091	0.098539714	0.014813912	0.655470028	0.016535695
STAU2|84153|AP	2.396665767	40.11283546	1.959466378	821.1621221	0.016545008
TPD52L1|77408|ES	2.396425262	5.842115077	1.379162766	24.74712152	0.016555869
TSLP|72947|AP	-2.396114856	1.61E-05	1.93E-09	0.134116329	0.016569897
APH1A|7450|ES	2.396112227	2.825365348	1.208108911	6.607590823	0.016570016
TRNT1|62974|AT	2.396100576	36.16500926	1.921492191	680.6730211	0.016570543
GBP3|3710|ES	-2.396062538	0.238942974	0.074087154	0.770629482	0.016572262
SLC5A6|52952|ES	2.395482118	34.72406089	1.905895821	632.6475936	0.016598524
SLC27A5|52475|AT	2.395096726	3.719288946	1.269518839	10.89634107	0.016615981
SLC27A5|52474|AT	-2.395081146	0.268871033	0.091774796	0.787706813	0.016616687
SSH2|40062|AT	-2.39376724	0.307524177	0.117102473	0.807592846	0.016676328
KIAA0586|27713|AP	2.393479162	3.824866583	1.275044864	11.47379578	0.016689429
FAM135A|76641|ES	-2.392729968	0.055253065	0.005154411	0.592289076	0.016723544
HMHA1|46371|AP	2.392609146	6.573752608	1.405664417	30.74291618	0.016729052
C12orf76|24405|AT	2.392335908	5.568053076	1.363868644	22.73181892	0.016741512
IL7|84254|ES	2.391853155	8.792688068	1.480733796	52.21152086	0.016763548
IL1RN|55039|ES	-2.391716696	0.005837744	8.62E-05	0.395150511	0.016769781
BRD8|96935|ES	2.391506065	150.2133535	2.470485638	9133.447783	0.016779407
TRMT2B|89626|AD	-2.39148408	0.330209008	0.1331704	0.818785475	0.016780412
RAP1B|22944|ES	-2.390434531	0.003359855	3.15E-05	0.35854087	0.016828449
WWP2|37321|ES	2.390072846	3.506456411	1.253292826	9.81034624	0.016845031
METTL23|43630|ES	-2.38927545	0.310209491	0.118754739	0.810324952	0.01688164
DERA|20596|ES	-2.388746548	4.43E-07	2.71E-12	0.072350877	0.016905961
NPEPL1|59991|AP	-2.388230759	0.003406072	3.21E-05	0.360972571	0.016929708
ANKDD1A|31142|ES	-2.387921083	0.272033364	0.093447978	0.79190746	0.01694398
PRRC2C|8989|ES	2.387478902	3269.640939	4.259174539	2510005.583	0.016964376
FLNB|65417|AD	2.387172635	23.76669756	1.762964305	320.4012193	0.016978516
DMKN|49198|ES	2.386566518	2.231728267	1.15430396	4.314817615	0.01700653
ST6GAL1|68067|AP	2.386260464	4.965399055	1.331464523	18.51734488	0.017020691
MGRN1|33785|AA	-2.386142027	0.033343328	0.002040876	0.544755097	0.017026174
TOM1L1|42543|AA	-2.385412784	0.000270295	3.16E-07	0.230995126	0.017059967
CCDC104|53621|AT	2.38496936	39.59160997	1.926173719	813.7872324	0.017080544
RCCD1|32527|RI	2.383447854	178454822.9	29.24871623	1.09E+15	0.017151314
MYNN|67581|ES	2.383444631	6.666192431	1.40082289	31.72286937	0.017151464
RSBN1L|80203|AP	2.38311328	8279.988771	4.96239634	13815545.83	0.017166911
MCF2L2|67797|AT	2.383036223	6.814073581	1.405914291	33.02590995	0.017170505
NINJ2|19605|AP	2.382149605	7.505762625	1.429371811	39.41344874	0.017211903
STX8|39220|ES	-2.382035426	1.78E-05	2.20E-09	0.143992336	0.017217241
LIMS1|54883|AP	2.381423132	3.57144949	1.252683144	10.18234462	0.01724589
AP5M1|27652|ES	-2.381220042	7.01E-06	4.01E-10	0.122517085	0.017255401
DALRD3|64809|RI	-2.380676584	0.097808702	0.014426974	0.663101105	0.017280876
ANKRD65|167|ES	2.380454242	5.305030697	1.342798808	20.95872481	0.017291308
DROSHA|71628|ES	2.380264201	3.577820399	1.25243839	10.22070141	0.017300229
DDX49|48531|AA	-2.379708017	0.001906496	1.10E-05	0.331341066	0.017326361
LOXL3|54106|AP	-2.379427341	0.419855402	0.205419801	0.858138105	0.017339561
RASGEF1B|69696|AA	2.379232101	3.899056311	1.270980372	11.96134925	0.017348748
SH3BP2|96674|ES	2.378480543	97.0119605	2.236665522	4207.746034	0.017384154
B3GALNT1|67502|ES	2.378325801	2.751424119	1.194870436	6.335695031	0.017391452
PTK7|76242|AP	2.378306314	120.0508162	2.321447107	6208.282075	0.017392371
FAM177A1|27182|AP	-2.37758725	0.536150379	0.320718527	0.896291313	0.01742632
MBTD1|42522|ES	-2.377522438	0.005832967	8.40E-05	0.405161931	0.017429383
ACOX3|68766|AP	2.376944635	3.562557804	1.249666211	10.1561665	0.017456708
MYO1D|40214|AT	2.376394371	2228.614875	3.860975354	1286391.082	0.017482766
TMEM205|47665|AD	-2.37632013	0.117535383	0.020102656	0.687201054	0.017486285
EDNRB|26098|AP	2.373825619	8.721429867	1.458765808	52.14225513	0.017604863
ERBB3|22353|AP	-2.372069953	0.255439504	0.082708383	0.788908421	0.017688741
HYAL1|65000|RI	-2.371600923	0.384537071	0.174549409	0.847145575	0.017711209
ATXN2L|35847|AA	2.37037955	3.710350917	1.25484604	10.97083107	0.017769833
BDH1|68298|AP	-2.370130743	0.009438405	0.000199643	0.446213646	0.017781796
NAIP|72433|ES	-2.369942089	0.003192557	2.75E-05	0.370031783	0.017790872
CSDE1|4339|ES	-2.368650839	5.56E-07	3.71E-12	0.083333982	0.017853099
KANSL1|42010|AP	-2.36828853	0.182660904	0.044729429	0.745929613	0.017870593
CMC2|94205|ME	-2.367973886	0.526050973	0.309117437	0.895224898	0.017885798
ZNF669|10512|AD	-2.366509785	0.001853451	1.01E-05	0.339361778	0.0179567
SYDE1|48049|AP	-2.366414101	0.155180638	0.033163094	0.726139434	0.017961342
LAMP2|89999|AT	-2.365692104	0.195865447	0.050739766	0.75607904	0.017996404
PIGX|68255|AP	2.365585725	4.07575901	1.272421792	13.05527115	0.018001575
PIGX|68256|AP	-2.365510474	0.245364016	0.076600824	0.785938033	0.018005234
DERA|20592|AP	-2.364902634	1.17E-05	9.61E-10	0.143129633	0.018034812
C18orf8|44828|ES	2.364190428	1912047.657	11.85777253	3.08E+11	0.018069522
ETFB|51320|AP	-2.363947911	0.203600909	0.054410742	0.761859298	0.018081355
ETFB|51319|AP	2.363830059	4.911178357	1.312474116	18.37725603	0.018087107
TENC1|21925|AP	2.362575413	2.396196497	1.160580349	4.947315935	0.018148449
TM9SF1|26892|AP	2.361825124	7.395246613	1.40556535	38.90937725	0.018185218
TM9SF1|26891|AP	-2.361698722	0.135236552	0.025703524	0.71153375	0.018191419
LHPP|13400|AT	2.361287743	18.88801141	1.647783808	216.5071493	0.018211594
LHPP|13401|AT	-2.361254784	0.052946923	0.004619153	0.606902794	0.018213213
PEX2|84241|ES	2.361063245	4.116969469	1.271759318	13.32755134	0.018222623
RAB11FIP3|32895|ES	-2.3601827	0.243109115	0.075119524	0.786773379	0.018265937
CYP8B1|64328|AT	-2.35994348	0.014238804	0.000416782	0.486449718	0.01827772
DROSHA|96874|ES	2.356382373	4.416123857	1.28385635	15.19028972	0.018453911
TAF12|1389|AD	-2.354599643	0.030784893	0.001698373	0.558010454	0.018542672
ATP6V0E2|82214|ES	-2.354391717	0.000841464	2.32E-06	0.305390685	0.018553048
CTPS2|88576|AP	2.353823922	4.042938306	1.263331227	12.93829345	0.018581411
NECAB3|59003|RI	-2.352322344	0.11816013	0.019936559	0.700312225	0.018656599
APC|72985|AP	-2.352285824	0.337140909	0.136262402	0.83415521	0.018658431
TRMT13|3870|AA	-2.351906547	0.156995041	0.033556493	0.734505922	0.018677467
PTK2|85322|ES	-2.351687974	0.142609742	0.028131504	0.722945296	0.018688444
CSRP2BP|58755|AP	-2.351386855	0.039969696	0.002730386	0.585110062	0.018703577
NUTM2E|12332|RI	2.350344119	2.579696337	1.170467709	5.685618782	0.018756062
GIT2|24371|ES	-2.349542713	0.008645703	0.000164324	0.454883237	0.018796487
TMEM243|80315|AP	-2.348830706	0.242540095	0.074373948	0.790944943	0.018832467
NBPF1|831|AP	-2.348714325	0.271195555	0.091277989	0.805747686	0.018838354
PHLDB2|66067|ES	-2.34794071	0.115623826	0.019094924	0.700126867	0.018877526
MCF2L2|67796|AT	-2.347203406	0.143791006	0.028472138	0.726178468	0.018914926
RMND5B|74836|ES	-2.346847565	0.199123795	0.051735374	0.766405713	0.018932999
LIMS3L|54936|AT	2.346367375	2.304892958	1.147418599	4.629985561	0.018957412
BTN2A2|75644|ES	-2.345204558	1.33E-05	1.11E-09	0.158036464	0.019016643
SEMA4D|86802|AP	2.343982889	31.01215626	1.755336349	547.902877	0.019079047
CC2D2A|68808|ES	-2.343819742	0.01724262	0.000578102	0.514283036	0.019087394
TMEM243|80314|AP	2.343748593	4.115524609	1.260697872	13.43505306	0.019091035
TMEM40|63450|ES	2.343332047	5.048549029	1.30328001	19.55669319	0.019112365
SEC24C|12197|ES	-2.342647201	0.134618856	0.025146453	0.720667709	0.019147479
QSER1|14864|AP	2.342331381	3.223717821	1.210557251	8.584770843	0.019163691
MAX|28008|ES	-2.342022707	0.1246773	0.021831357	0.712023023	0.019179548
GIT2|24391|AA	2.341867342	8.43383912	1.415835831	50.23862284	0.019187534
LSM1|83373|ES	-2.341340073	0.003914265	3.78E-05	0.405388782	0.019214656
ARHGEF40|26525|AD	-2.341051473	0.001589552	7.21E-06	0.350275836	0.019229516
PTGES3|93182|ES	-2.340662158	0.056472482	0.005089579	0.626602152	0.019249577
PPM1K|69885|AT	-2.339523582	0.01860919	0.000660953	0.523943032	0.019308353
CACNA2D1|80252|AP	-2.337919975	0.007003228	0.000109379	0.448398019	0.0193914
UIMC1|74697|AD	2.337805209	4.05616555	1.253963784	13.1203781	0.019397355
GPX8|72029|AD	-2.337782808	0.021346058	0.000848479	0.537024462	0.019398518
PCDHA2|73769|AT	2.337003278	2.995866909	1.193656946	7.519093793	0.019439014
GHDC|41017|AP	2.335785489	20.85222877	1.630226809	266.7208283	0.019502424
FAM111A|16026|RI	-2.335752325	0.473403201	0.252762664	0.886644358	0.019504154
ZC3H14|28721|ES	2.335016983	78.2525575	2.014354115	3039.913742	0.019542534
TCOF1|74068|AT	-2.334684406	0.010673472	0.000236087	0.482547476	0.019559914
TCOF1|74066|AT	2.334587124	93.67235655	2.071942434	4234.919964	0.019565
PTPLAD2|85991|AT	-2.334303202	0.187697982	0.046071298	0.764695895	0.019579851
PTPLAD2|85992|AT	2.334232388	5.327447689	1.307643427	21.70446339	0.019583557
TATDN1|85093|ES	-2.3335513	0.280843233	0.096655257	0.816023091	0.019619229
ACOT8|59632|ES	-2.333091349	0.414506026	0.197801392	0.868625058	0.019643351
MLF1|67439|ES	2.333004068	4.519463577	1.272759518	16.04824065	0.019647932
DTNA|45097|AT	2.332998165	3.452488109	1.219114558	9.777320817	0.019648242
ATXN2L|35857|AD	2.332527675	6.689375637	1.354674522	33.03210159	0.019672949
DENND3|85326|AP	2.332032222	2.505930858	1.157855155	5.423553575	0.019698996
CSPP1|84078|ES	2.3319671	22.19542052	1.639684883	300.4459559	0.019702422
MACROD2|58714|AP	2.331773694	2.350253309	1.145976127	4.820074771	0.0197126
CTPS2|88575|AP	-2.331362351	0.244110843	0.074599302	0.79880243	0.019734261
SLC39A1|7764|AP	2.330911709	14.15114934	1.524544728	131.3539865	0.019758016
ACOX3|68765|AP	-2.330603143	0.286771741	0.100309364	0.819844011	0.019774296
YTHDF1|60099|ES	2.330543014	2139.611375	3.384976616	1352427.906	0.019777469
GPSM1|88149|AP	2.329611337	2.852600594	1.180958489	6.890445534	0.019826702
PAX9|27293|AD	2.329270433	112387.3817	6.321099344	1998216272	0.019844744
ZDHHC16|12705|ES	-2.329254318	0.002997348	2.26E-05	0.398061986	0.019845597
ARFGAP2|15645|ES	2.329208824	259.9933207	2.414566382	27995.30686	0.019848006
MMP11|61322|AA	2.328887634	2504992.579	10.31923388	6.08E+11	0.019865019
ZFP64|59813|AT	2.328793033	3.33829277	1.21036019	9.207340685	0.019870033
TMEM120A|80146|ES	2.32805499	6.572201565	1.346756406	32.07249151	0.019909184
TADA2B|68734|AD	2.327928125	2674.155305	3.48111621	2054256.785	0.019915921
ZNF385A|22177|AP	2.327801149	2.357977539	1.145165886	4.855242496	0.019922665
MAN2C1|124833|ES	2.327459227	568.654851	2.722564058	118773.455	0.019940837
AQP1|79157|AP	-2.327274608	0.249485206	0.077491346	0.803223472	0.019950654
OGFOD3|44324|ES	-2.327106966	0.185155411	0.044733422	0.766373879	0.019959573
PODNL1|47950|ES	2.326699879	3.624120071	1.225016282	10.7216912	0.019981244
CD44|14979|AA	2.3256981	26.30359689	1.672277804	413.7346126	0.020034662
CCBL1|87786|ES	-2.325665878	0.34836021	0.143242309	0.847199662	0.020036382
EPB41L2|77528|AP	-2.325474159	0.154800475	0.032128721	0.7458494	0.02004662
USP16|60300|AA	2.325284845	8.657786479	1.403699426	53.39979864	0.020056734
R3HDM1|55443|ES	-2.324224507	0.373205523	0.162548104	0.856868576	0.020113464
DUOX1|30403|ES	-2.322860194	0.194931791	0.04905753	0.774568205	0.020186664
AP2B1|40327|AD	2.321116566	6.92286127	1.35127481	35.46725493	0.020280554
KANSL1|42011|AP	2.321026018	6.43472848	1.33590657	30.99448085	0.02028544
DENND3|85325|AP	-2.320932337	0.401986966	0.186200048	0.867848974	0.020290496
TSC1|87997|AT	-2.319989071	0.142173424	0.027359354	0.738807014	0.020341469
TSC1|87998|AT	2.319834368	7.032754699	1.353357574	36.54587643	0.020349839
HNRNPLL|53260|AT	-2.319303502	0.249801789	0.077361372	0.806616173	0.020378586
C14orf28|27387|ES	-2.319220918	0.000306021	3.28E-07	0.285514541	0.020383061
TVP23A|33993|AT	-2.318821247	0.230285398	0.066562172	0.796719257	0.020404731
TVP23A|33992|AT	2.318813402	4.342451818	1.255142628	15.02370119	0.020405156
SLC52A2|136802|ES	2.317531252	2.863702067	1.176246875	6.971996869	0.02047481
SRRT|81018|AA	2.317399133	48.94146732	1.822281299	1314.433301	0.020482
ASTE1|66777|AD	2.316724144	38.80522134	1.756622947	857.2387178	0.020518763
C15orf41|29902|RI	-2.314214301	0.07585297	0.00853875	0.673830794	0.02065597
SUOX|22340|ES	-2.313213257	0.150448281	0.030227005	0.748823295	0.020710917
TUBB3|38168|AP	-2.31296843	0.30553627	0.111870373	0.83446948	0.020724375
SSBP3|3142|ES	-2.312197192	6.01E-05	1.59E-08	0.227520484	0.020766819
HERPUD2|79234|RI	-2.311964042	0.317403207	0.119978398	0.83969112	0.020779665
TMEM159|34430|RI	-2.311783941	4.45E-06	1.29E-10	0.153321963	0.020789593
FGF7|30551|AT	-2.311685726	0.007408017	0.000115752	0.474106927	0.020795009
OARD1|76086|ES	2.311180322	31.58756276	1.689944929	590.4181278	0.020822897
D2HGDH|58423|ES	2.311075055	2.761271092	1.166851749	6.534350275	0.02082871
ATP5G2|99402|ES	-2.310607649	0.369576749	0.158858983	0.859800125	0.020854536
TBRG1|19228|ES	-2.310598555	0.003327219	2.63E-05	0.420701943	0.020855039
STPG1|1105|AP	-2.310473179	0.044256445	0.003143146	0.623144171	0.020861972
TK2|36724|RI	-2.309867236	0.21438442	0.058036153	0.791931883	0.020895505
GAS6|26397|AP	-2.309192512	0.195144688	0.048756856	0.781048095	0.020932901
TRMT11|77435|AD	2.308352285	1549971.7	8.595580992	2.79E+11	0.020979551
CD84|8475|ES	-2.308258896	0.052989581	0.004374101	0.641936615	0.020984741
PTPRA|58565|AP	2.308093929	86.74225778	1.960394409	3838.11505	0.020993913
SULT1A3|94134|AP	-2.307941418	0.236884527	0.069723143	0.804815681	0.021002395
PTPRA|58566|AP	-2.307876169	0.011533127	0.000260649	0.510315365	0.021006025
SRSF7|53277|RI	2.306263853	25.11349183	1.622574934	388.6954363	0.021095894
MAGOHB|20472|ES	-2.305734779	0.053086324	0.004376918	0.643868008	0.021125457
EFCAB11|28801|AA	-2.305718196	0.005142716	5.83E-05	0.453713439	0.021126384
NCOA1|52826|ES	2.305333859	22.49028677	1.594215215	317.280248	0.021147883
NBPF1|830|AP	2.305268218	3.596529166	1.211338013	10.67829285	0.021151556
DYSF|53934|AP	2.304656294	2.648663567	1.156829462	6.064349953	0.02118583
PPIL2|61252|ES	2.302880948	13.7450646	1.477334867	127.8835321	0.021285542
TSR1|38388|AD	-2.302730845	3.42E-06	7.62E-11	0.15360586	0.021293992
LIMS3L|54938|AT	-2.301209864	0.440353085	0.218989225	0.885481188	0.021379772
ITGBL1|26205|AP	-2.300974194	0.00028156	2.66E-07	0.297726462	0.02139309
NRXN3|28637|AP	-2.300001584	0.392868577	0.177207465	0.870988806	0.02144813
SSFA2|56439|AP	2.299793046	3.568440853	1.206804776	10.55164048	0.021459948
DFNB31|87324|AP	2.298449075	3.83967106	1.219121731	12.09319257	0.021536243
LAMA4|77295|AT	-2.298203077	0.004945086	5.34E-05	0.457761199	0.021550234
CHST11|24115|AD	2.297787551	4.995357356	1.266788521	19.69831167	0.021573884
SLC9A8|59750|ES	2.297145442	42.67831538	1.73494775	1049.852138	0.021610474
PXMP2|25283|AT	-2.296934642	0.044881604	0.003176028	0.634238144	0.021622498
PXMP2|25282|AT	2.296804192	22.27749811	1.576422957	314.8183803	0.021629942
PEX2|84240|ES	2.296459743	89456.67774	5.315573683	1505481378	0.021649608
COL1A2|316193|ES	2.296167365	10.43766996	1.40975386	77.27941537	0.021666314
CD7|44320|RI	-2.295820127	0.170879108	0.037811863	0.772235679	0.021686168
CENPK|72219|AD	2.295763491	9.363652684	1.387051332	63.21178571	0.021689408
HMGA1|75773|RI	-2.295278987	0.369336894	0.157775719	0.864580061	0.021717141
CAST|196583|ES	2.295010436	2.42169133	1.137829388	5.154190039	0.021732526
TMEM116|24566|ES	-2.29407075	0.258061727	0.08111914	0.820963522	0.021786435
TENC1|21923|AP	-2.293915449	0.453578666	0.230828929	0.891281724	0.021795356
MOK|29368|AT	2.293813693	7.396174867	1.338068535	40.88236231	0.021801203
MOK|29371|AT	-2.293738172	0.135213645	0.024461942	0.747394881	0.021805543
ATF2|56070|ES	-2.292564241	0.28164603	0.095332959	0.832078297	0.021873105
DECR1|84407|ES	-2.292499807	0.330562155	0.128304068	0.85165919	0.021876819
SMUG1|22134|ES	2.29233439	3.504586941	1.19941105	10.24013379	0.021886355
AUTS2|79911|ES	2.291580973	13.06155151	1.450429839	117.623151	0.021929834
PPARA|62688|ES	-2.291421663	0.096581988	0.013080629	0.713121715	0.021939038
EIF6|59075|ES	2.29115399	6011.205886	3.517669196	10272312.2	0.021954509
MFSD12|46692|AP	2.289407659	2.932456324	1.167438992	7.365952441	0.022055678
DAGLB|78728|ES	2.288862572	2441.119728	3.067469996	1942664.649	0.022087339
KLC1|29468|AT	-2.287709052	0.123814805	0.020678436	0.741357148	0.02215447
MFSD12|46693|AP	-2.286234982	0.342155883	0.136432992	0.858081658	0.022240515
HR|82940|ES	2.285696925	3.52289965	1.196570645	10.37199265	0.022271995
PCM1|82841|AA	-2.28503606	0.088229423	0.010995759	0.707948482	0.022310713
IMPDH1|81671|AP	-2.283545917	0.293048429	0.102191387	0.840358314	0.022398231
PCM1|82837|AD	2.28284303	6.156872109	1.293138161	29.31401709	0.022439616
TRPV4|24354|ES	2.282279113	102.3723136	1.922596981	5451.00752	0.022472867
CCBL1|87785|ES	-2.28121134	0.000362549	4.01E-07	0.327702087	0.022535944
METTL6|63575|AT	-2.280241481	0.01262027	0.000294345	0.541103636	0.02259337
TMEM256-PLSCR3|38938|ES	2.279768397	8.85540657	1.357918755	57.74883454	0.022621428
SCFD1|27084|AD	2.279645418	30.63714881	1.615924295	580.865632	0.022628727
HSF1|85559|ES	2.279279345	11.60048715	1.409703138	95.4607382	0.022650465
THADA|53382|AT	-2.278769961	0.093097277	0.012081543	0.717383761	0.022680743
CDIPT|35973|ES	2.278462508	2.730617299	1.150756452	6.479451689	0.022699036
LMBR1L|21522|ES	-2.278451191	0.215553964	0.057579663	0.806943095	0.022699709
ZBTB43|87602|ES	-2.278283059	0.250264457	0.076006953	0.824033805	0.022709718
BCL11A|53667|ES	-2.278164184	0.030524483	0.001516882	0.614249538	0.022716797
SUFU|12962|AT	-2.277770855	0.039183714	0.00241273	0.636359466	0.022740234
SUPT5H|49833|AP	-2.275793351	1.77E-06	1.96E-11	0.159099384	0.022858381
ACIN1|26702|AP	-2.275656418	0.148970672	0.028901067	0.767869963	0.022866582
ACIN1|26701|AP	2.275611768	6.712476678	1.302255101	34.59947528	0.022869256
LARP6|31442|AT	2.275292322	2.748592101	1.1504174	6.566971726	0.0228884
LARP6|31443|AT	-2.275260777	0.363827955	0.152279501	0.869261978	0.022890291
OSBPL5|13951|AP	2.274928215	3.145051457	1.171916461	8.440318912	0.022910236
RILP|38360|ES	2.274789573	130.4456399	1.96232318	8671.38764	0.022918556
RASSF1|65017|AP	2.274489867	8.435494182	1.342970278	52.98520992	0.02293655
PHACTR1|75367|AT	-2.274471677	0.067686056	0.006648348	0.6891038	0.022937642
MED20|76152|AD	2.273850255	1287.899913	2.687160287	617263.583	0.022974991
GPR162|19974|ES	-2.273351711	0.020079237	0.00069098	0.583484171	0.023004994
LNPEP|72874|AP	-2.273179753	0.078137561	0.008675006	0.703801065	0.02301535
IL1RN|55030|AP	2.272765669	1.859818705	1.089149139	3.175805307	0.023040305
LDLRAD2|1002|RI	-2.272681446	9.27E-07	5.81E-12	0.14787629	0.023045384
BEST3|23330|AT	2.272269791	2.866119036	1.155717085	7.107828061	0.02307022
DPP8|31176|ES	2.27173119	134.3193569	1.959119316	9209.081588	0.023102751
GNB2L1|75091|ES	-2.271699442	0.112829285	0.017174168	0.741255553	0.02310467
TMEM161A|48589|AA	-2.271607635	0.034920207	0.001932102	0.631136873	0.023110219
TGFA|53893|AP	-2.271021392	0.064405804	0.006039337	0.686848195	0.023145683
ATXN2L|35848|ES	2.270642712	3.763403325	1.198818237	11.81430525	0.023168616
ABCD4|28393|ES	-2.270204258	0.233380886	0.066449106	0.819674506	0.023195193
RAB3GAP1|55433|ES	-2.269937189	0.290235964	0.099739438	0.844569778	0.023211394
BIVM|26224|ES	-2.269412652	0.122562963	0.019999836	0.751090137	0.023243244
ACAD10|24536|ES	2.26582258	4.469227059	1.22397768	16.31891727	0.023462248
TCF3|46537|RI	-2.265430055	0.008947898	0.000151226	0.529436825	0.023486302
WDR35|52748|ES	-2.265062247	0.007431227	0.000106877	0.516698423	0.02350886
INPP5K|38318|ES	2.264555911	3.999501393	1.204958865	13.27515142	0.023539945
RHOF|24897|AT	-2.264182147	0.12168326	0.019650388	0.753512646	0.023562914
RHOF|24898|AT	2.263966605	8.21641979	1.326851882	50.87949536	0.023576169
IMPDH1|81670|AP	2.263173103	3.375300431	1.177011688	9.679303198	0.023625021
TMUB2|41815|AD	-2.262322154	0.269616788	0.086611236	0.839304643	0.023677507
COL1A1|564860|ES	2.262272178	6.551286846	1.285541203	33.38621839	0.023680592
SSFA2|56438|AP	-2.261892782	0.287998885	0.097936559	0.846909048	0.023704028
AFMID|43799|ES	2.261733588	3.980316566	1.202384652	13.17624933	0.023713868
EFCAB10|81301|AT	2.261664143	6.952736179	1.295213622	37.32244594	0.023718162
KLC3|50425|AA	-2.261328747	0.00728293	0.000102212	0.518933758	0.023738907
MAGED4B|89153|AA	2.260257489	6.283672938	1.276583229	30.92986396	0.023805275
SSH2|40060|AT	2.2601507	2.955691799	1.154812814	7.564961095	0.023811899
FOSL1|16942|ES	2.260041204	80.12208332	1.789661568	3587.017988	0.023818694
FAM135A|76634|AT	-2.25919005	0.063728624	0.005848346	0.694442106	0.023871565
FAM135A|76635|AT	2.259137817	15.69065361	1.439914606	170.980008	0.023874813
FAM156B|89175|RI	-2.258223388	0.0444178	0.002976739	0.662786069	0.023931736
CRELD2|390167|ES	-2.257996294	5.83E-05	1.23E-08	0.276117101	0.02394589
PWWP2A|74410|ES	2.25796638	3.425075055	1.17642653	9.971841702	0.023947756
FKBP11|21492|AP	2.256848409	116.3553789	1.869608023	7241.397147	0.024017549
FKBP11|21493|AP	-2.256773027	0.008595874	0.000138121	0.534957677	0.024022261
LETMD1|21753|ES	2.25572769	12.19926689	1.388150516	107.2089164	0.02408769
RARRES2|82226|RI	-2.255648676	0.106656969	0.015254423	0.745731835	0.024092642
AMPD2|4048|ES	2.2552968	17.68013579	1.456663302	214.5912519	0.024114705
RAB36|61297|ES	-2.255231844	0.000814539	1.68E-06	0.394056873	0.02411878
PYCR1|44244|ES	2.255130156	59.17466386	1.705880929	2052.687725	0.02412516
TRIM62|1665|AP	-2.254847098	0.045708598	0.003127792	0.66797155	0.024142928
TMEM218|19278|ES	-2.254579218	0.338480308	0.131991097	0.868004898	0.024159753
NQO1|37298|AT	-2.254450801	0.00011312	4.19E-08	0.305137168	0.024167822
UBAP2L|7810|AP	-2.253640528	0.127945239	0.021400001	0.764952509	0.024218792
ZNF397|45149|AD	2.253470516	3.330909385	1.16966623	9.485575501	0.024229498
C3orf33|67352|ES	-2.253134447	0.271386681	0.087272348	0.843918287	0.024250673
WIBG|22287|AP	2.25220839	6.24225131	1.268243717	30.72414307	0.024309106
GHDC|41016|AP	-2.251867228	0.055403249	0.004466244	0.687270955	0.024330664
FBXL8|36936|RI	-2.251143	0.069689759	0.006854421	0.708544545	0.024376482
FAM227B|30540|AT	-2.250379787	0.368626702	0.1545633	0.879158539	0.024424847
MRPS24|79352|RI	-2.250189603	0.015929326	0.000432785	0.5863035	0.024436912
HTATSF1|90210|AP	2.249601836	12.79529317	1.38846045	117.9144335	0.024474232
TAF9|72343|AP	2.249280501	25.34146989	1.515547737	423.7346541	0.024494656
BCAS4|59784|ES	2.249199814	2.48317341	1.124076654	5.485524643	0.024499786
ZNF638|53930|ES	2.247834472	18299.83264	3.514578597	95284218.42	0.024586747
ZNF587B|52348|AT	-2.247714669	0.141784628	0.02581464	0.778739534	0.02459439
RPP14|96410|ES	2.247601714	3.008296567	1.151365671	7.860099065	0.024601598
RPS20|83892|ES	-2.247518275	0.005445703	5.78E-05	0.513267647	0.024606924
ARAP1|17639|AP	2.247443195	4.082899006	1.197157739	13.9247016	0.024611717
FIP1L1|69315|ES	2.247296468	3.997757529	1.193840805	13.38709918	0.024621086
DIS3L|31260|AP	-2.247047201	0.369338569	0.154922765	0.880509579	0.024637011
ZNF135|52391|RI	-2.245104449	0.003389425	2.37E-05	0.485637908	0.024761428
AIG1|77976|ES	-2.244940019	0.00059203	9.00E-07	0.389292924	0.024771983
CTSC|18214|AA	2.244292616	1104917.235	5.82944611	2.09E+11	0.02481358
HTATSF1|90209|AP	-2.243702439	0.078594939	0.008520743	0.724956046	0.024851553
SIPA1L1|28195|AP	-2.243365532	0.09185423	0.011407453	0.739621659	0.024873253
FAM63A|7536|AA	2.243268256	10.00497509	1.337574984	74.83657198	0.024879521
MYO19|40489|ES	-2.242430609	0.266630456	0.083971999	0.846613162	0.024933555
FARP1|26165|AT	2.241203021	446.0269025	2.150092048	92526.2702	0.025012927
TTC14|67724|AT	2.240660261	10.4000048	1.340935135	80.66020274	0.02504809
TTC14|67725|AT	-2.240623564	0.096155178	0.012397604	0.745774584	0.025050469
AGAP3|82352|AT	2.239601962	7.552123726	1.287170886	44.31002395	0.025116775
AGAP3|82351|AT	-2.239601962	0.132413085	0.022568257	0.776897622	0.025116775
AMT|64865|ES	-2.239094908	0.000147217	6.51E-08	0.332880518	0.025149742
TEX10|87077|AP	-2.239064964	0.000406249	4.37E-07	0.377818921	0.02515169
ITFG2|19717|AD	-2.238583797	0.043754539	0.002826103	0.677420433	0.025183009
UBE2A|89957|ES	-2.237868651	0.018983155	0.000589568	0.611227754	0.025229622
ADAR|7837|AP	2.23781729	3.49135689	1.167937491	10.43683675	0.025232972
COBLL1|55780|AP	-2.237800738	0.339532067	0.131827384	0.874492239	0.025234052
CXADR|60227|AT	2.237608669	4.796785026	1.214766977	18.94120191	0.025246586
CXADR|60226|AT	-2.237608669	0.208472966	0.05279496	0.823203148	0.025246586
ZNF37A|11312|ES	-2.237483703	0.434984907	0.209792119	0.901901705	0.025254743
LZTS2|12860|AP	-2.235917819	0.366600471	0.152115239	0.883513754	0.025357155
C14orf159|28839|AP	2.235615409	3.371291527	1.161655346	9.78397474	0.025376974
DDX52|40542|ES	-2.235287106	0.128900386	0.021384522	0.776978308	0.025398506
FOXJ3|2067|AP	-2.235149892	0.317131682	0.11584715	0.868148273	0.02540751
CCNF|33268|ES	-2.234851866	0.069159602	0.006643603	0.719948255	0.025427075
SH3BP2|68591|AP	2.234696657	3.630049952	1.171751238	11.24578513	0.02543727
LZTS2|12861|AP	2.234471368	2.726041195	1.131112129	6.569906209	0.025452074
ATXN2L|35840|ES	2.233833398	2.450679978	1.116160857	5.380794635	0.025494037
ZMYND8|59708|AP	2.231620069	5.340613206	1.226224489	23.26013684	0.025640084
DNASE1L1|90573|AP	-2.230981638	0.282189052	0.0928599	0.857535505	0.025682345
COA3|41129|AT	2.23088441	917671.635	5.298020293	1.59E+11	0.025688787
PTPN13|69835|ES	-2.230844075	0.096334187	0.012329778	0.752671737	0.025691459
GALE|1077|ES	2.230661313	27.77171007	1.496874656	515.2521472	0.025703572
HLCS|60538|ES	2.230270588	5.275633499	1.223316895	22.75151183	0.025729485
SYNGR2|43777|ES	-2.229239067	0.000201708	1.14E-07	0.357798719	0.025798002
TP53INP2|59033|ES	-2.228474413	0.037127101	0.002049845	0.672451676	0.025848896
EIF3K|49685|AD	2.228318035	59506883.3	8.635413467	4.10E+14	0.025859315
LILRB2|51857|AP	-2.227793992	0.001056294	2.54E-06	0.43872589	0.025894256
STON2|28674|AT	-2.227645485	4.40E-06	8.54E-11	0.227188812	0.025904165
MAF1|85533|AP	-2.22720271	0.074131603	0.007509195	0.73183537	0.025933729
AQP1|79158|AP	2.227197044	3.489667594	1.161787323	10.48193561	0.025934108
MAF1|85532|AP	2.227165443	13.48905746	1.36636952	133.1665179	0.025936219
LACC1|25776|AP	-2.226448189	0.333224722	0.126647944	0.876751028	0.025984176
TMEM104|43304|AA	2.226278887	22.04915164	1.44777481	335.8015933	0.025995507
TBC1D5|63667|ES	-2.225935558	0.212501666	0.054337106	0.831051959	0.026018498
TUBB3|38167|AP	2.225621743	2.416690705	1.11107293	5.256535196	0.026039529
ARL6IP4|25029|AD	-2.225502979	0.124580099	0.01989872	0.779959758	0.026047491
RBM42|49228|AA	2.225301675	12.53166118	1.351832732	116.1700913	0.026060993
CNOT4|81886|AT	-2.224941981	0.005236622	5.13E-05	0.53499769	0.026085133
NUP35|56473|ES	-2.224584224	0.008704009	0.000133203	0.568753534	0.026109163
ZNF276|38137|AP	2.224485582	3.902956345	1.175776445	12.95575217	0.026115791
FAM134C|41083|AP	2.224393853	10.00895034	1.31499305	76.18221771	0.026121957
FAM134C|41082|AP	-2.224154965	0.099938461	0.013130453	0.760651301	0.02613802
SUGT1|26006|ES	2.224084086	5.364416667	1.220770752	23.57278476	0.026142787
ACBD5|11068|ES	-2.224076183	0.001066211	2.56E-06	0.443661934	0.026143319
AZI2|63793|AT	-2.2239867	0.234259129	0.065195877	0.841730217	0.026149339
AZI2|63794|AT	2.223985889	4.268774485	1.18802847	15.33838293	0.026149394
ATP5SL|50074|ES	2.223917331	21.53528262	1.439559442	322.1599496	0.026154007
ODF2|87755|AT	-2.223604713	0.049130181	0.003450297	0.699584672	0.026175051
VEGFA|76328|ES	2.22344822	4.266021077	1.187570273	15.32451278	0.026185591
ODF2|87754|AT	2.223432467	20.34991604	1.429090745	289.7780174	0.026186652
KANK3|47222|AT	2.222848921	2.545528871	1.116835693	5.801853642	0.026225989
UBAP2L|7811|AP	2.22174803	7.612845527	1.270196435	45.62712932	0.026300339
AK2|1651|AT	2.221567167	5.813385899	1.230314745	27.46895113	0.026312571
STX10|47926|AD	-2.220613764	3.31E-06	4.82E-11	0.227384132	0.026377133
KLF10|84780|AP	-2.219778802	0.006907749	8.54E-05	0.55860441	0.026433787
POLM|79450|ES	2.219756666	5.967734523	1.232531631	28.89488143	0.02643529
KLF10|84779|AP	2.219717604	144.7439655	1.789928452	11704.83408	0.026437943
NME6|64586|ES	2.219581612	43.52797448	1.554825667	1218.583281	0.026447182
GABPB1|30576|ES	-2.219452558	0.041768812	0.002528996	0.689852324	0.026455951
IP6K2|64750|RI	-2.217555205	0.403033896	0.180520559	0.899821728	0.026585175
FKBP2|16602|AP	-2.217110945	0.101678938	0.013477404	0.767106691	0.026615511
METTL23|43638|ES	-2.216797055	0.29716732	0.101638675	0.868846585	0.026636963
OSBPL6|56152|ES	2.216714408	3.590647937	1.159585461	11.1184152	0.026642614
PDXDC1|34127|ES	-2.215535324	0.229145755	0.062235392	0.843696409	0.026723343
CCT7|53967|ES	-2.21552781	0.479840416	0.250599107	0.918785497	0.026723858
CTNND1|15999|ES	2.21520484	2.970177781	1.133639711	7.781975143	0.026746008
ADARB1|60867|ES	-2.214913845	0.345135458	0.13463542	0.884748492	0.026765979
ZBTB44|19496|AA	-2.214855596	0.009570603	0.0001564	0.585653842	0.026769978
PKD1L2|37758|AT	2.214661211	2.198558736	1.094832313	4.414977946	0.026783327
ADAM28|83090|AD	2.213671867	13.14367834	1.343431773	128.5932667	0.02685136
TMEM127|54518|AA	2.212903864	4.131219953	1.176031988	14.5123419	0.026904274
CARF|56967|AT	-2.212816102	0.021401627	0.000710671	0.644503035	0.026910327
CARF|56965|AT	2.21271902	46.71890436	1.551326583	1406.961015	0.026917023
KRT15|40918|RI	-2.212320294	9.87E-05	2.79E-08	0.34918684	0.026944542
IL17RC|63263|AD	2.21215198	15158.526	2.996401054	76685632.67	0.026956166
CYTH1|43890|ES	2.211441005	2.882173428	1.127918441	7.364826539	0.027005313
ZNF131|71932|ES	-2.211226817	0.000874088	1.70E-06	0.449228574	0.027020134
LAMP2|90000|AT	2.210920084	4.806310293	1.195062946	19.33004343	0.027041372
RNF180|72195|AT	-2.210912605	0.428696052	0.202325989	0.908337608	0.02704189
RNF180|72196|AT	2.210906756	2.332651788	1.100909889	4.942515659	0.027042295
NRXN3|28638|AP	2.210777604	2.643563837	1.116599952	6.258669228	0.027051241
TMUB2|41813|ES	-2.210547955	0.346548963	0.135425582	0.88680574	0.027067156
EIF3H|84958|ES	-2.209858821	0.251160075	0.073748957	0.855352892	0.027114962
CIRBP|46441|RI	-2.209807047	0.070568122	0.006720392	0.741007318	0.027118556
TMEM165|69325|ES	-2.209629182	0.392890297	0.171548034	0.899822528	0.027130908
SMAD4|45559|AP	-2.209416806	0.259094175	0.078187711	0.858572162	0.027145663
ZNF398|82171|AP	2.209249128	2.466999082	1.107264025	5.496507006	0.027157317
DMKN|49144|ES	2.209002983	4.117010885	1.172969891	14.45031008	0.027174433
SULT1A3|94138|RI	-2.208813968	0.196581911	0.046417109	0.832547492	0.027187583
SEC16A|88178|ES	2.208481652	8.27871095	1.26851963	54.02916388	0.027210715
CBWD5|86508|ES	2.208324939	138.9576016	1.74181048	11085.71527	0.02722163
KIAA1715|56100|ES	2.208065561	5.54244763	1.212169726	25.34193445	0.027239703
NOD1|79119|AA	-2.2079257	0.285775309	0.094002782	0.868777774	0.027249453
UQCRB|84609|RI	-2.207192967	0.056118921	0.004348421	0.724247489	0.027300581
TMEM107|39117|ES	2.206817809	2.883859163	1.125777402	7.387467234	0.02732679
ATG4D|47537|ES	2.206637328	39.84191746	1.50972281	1051.436977	0.027339407
SMAD6|31295|AP	2.206404322	2.606617261	1.112943192	6.104941918	0.027355703
POLR2J3|273766|ES	2.206122514	16.11841909	1.363680715	190.5163217	0.027375423
PCNXL4|27769|ES	-2.205246671	0.318137004	0.114961135	0.880394524	0.02743679
MASP1|68074|AT	2.204357782	7.891822109	1.25738618	49.53200314	0.027499192
TMEM218|19269|AA	-2.203953363	0.353190855	0.139976993	0.891173448	0.027527624
TMEM40|63451|ES	2.20393275	3.255998313	1.139600431	9.302843987	0.027529074
COL1A1|402552|ES	-2.201770175	0.002823772	1.52E-05	0.524857125	0.027681547
LSM14B|95990|ES	2.201562988	21.20170141	1.398155933	321.5035835	0.027696193
LACC1|25775|AP	2.201164801	2.968327782	1.126619447	7.82071519	0.027724359
PI4KA|61189|ES	-2.200975204	0.15674133	0.03009512	0.816339807	0.027737779
LYRM9|39862|AP	2.199772276	8.080193492	1.255806225	51.99012838	0.027823056
SRSF4|1421|ES	2.198430869	1577975.732	4.702368369	5.30E+11	0.027918416
TLE3|31413|AD	-2.198411221	0.24866317	0.071907963	0.859896027	0.027919815
CCDC106|52129|RI	2.198068687	2.51072669	1.1048621	5.705461805	0.027944212
INO80C|45175|AA	-2.197725245	0.282116548	0.091266752	0.872056302	0.027968691
CUL1|82147|AP	2.19693579	5.467674617	1.201110208	24.88986067	0.028025032
SF3A1|61728|ES	2.196506645	2302.909263	2.301891812	2303927.163	0.0280557
DUSP15|58908|AT	2.195009301	2.098087258	1.082583518	4.066171401	0.028162931
FAM32A|48143|ES	2.194806612	2.791041367	1.116083403	6.979686186	0.028177473
EIF4ENIF1|61859|AD	-2.194742025	0.001012621	2.14E-06	0.478259713	0.028182108
NECAB3|59002|RI	-2.194657523	0.106031244	0.014291783	0.786649534	0.028188174
STPG1|1103|AP	2.194121909	18.4176174	1.364666168	248.5652817	0.028226647
ENPP2|85007|ES	-2.193908174	0.086436372	0.009700115	0.770222479	0.028242012
SCAMP5|31823|ES	2.1934801	2.923790429	1.120996507	7.625849339	0.028272807
IL1RN|55028|AP	-2.19288765	0.556295977	0.329355469	0.939608549	0.028315475
NVL|9947|ES	-2.192817093	0.138453995	0.023648027	0.810617672	0.02832056
MAPK9|75007|AA	-2.191197583	0.046751146	0.003019668	0.723811186	0.028437497
RBPJ|68985|ES	-2.191126607	0.21861003	0.056105392	0.85179594	0.028442632
CD80|66331|ES	-2.190753171	0.045892388	0.002913821	0.722800503	0.028469659
RPL32|63468|RI	-2.18894051	0.374387686	0.155337489	0.902332984	0.028601164
RFXANK|48608|ES	2.188929788	14.09439507	1.318840347	150.6262474	0.028601944
C3orf17|66167|ES	-2.18878344	0.362668841	0.146241321	0.899394835	0.028612584
RIF1|55575|RI	2.188518075	2.620892071	1.105859645	6.211525377	0.028631886
SMAD6|31294|AP	-2.188374016	0.386565879	0.165017611	0.905558974	0.028642369
METTL23|43634|ES	-2.188310439	0.179652752	0.038607022	0.835990705	0.028646997
ELMOD3|54216|ES	2.188284268	14.97005115	1.326233375	168.976619	0.028648902
ZNF211|52308|AP	2.187871788	24.6051171	1.396051176	433.6601681	0.028678943
ZNF211|52309|AP	-2.187793892	0.040647091	0.00230627	0.716388732	0.028684619
SEC14L1|43703|AP	-2.187699249	0.268406442	0.082612815	0.872044101	0.028691517
ZNF227|50300|ES	2.187609418	3.352476402	1.134149301	9.909716484	0.028698065
ADAR|7838|AP	-2.18701162	0.294331755	0.098359803	0.880757989	0.028741676
GCOM1|30798|AT	-2.186786551	0.416548546	0.190012033	0.913166859	0.02875811
CUL1|82148|AP	-2.1864316	0.181077646	0.039138036	0.837781273	0.028784044
CKLF-CMTM1|36738|AT	-2.186059879	0.304735969	0.105008209	0.884350009	0.028811225
TBC1D16|44010|AT	-2.185914337	0.075798077	0.007501052	0.765938973	0.028821873
TBC1D16|44011|AT	2.185906919	13.19279995	1.305575293	133.3128557	0.028822416
UQCRC1|64718|ES	-2.185674602	0.008748285	0.000124847	0.613008006	0.02883942
TPT1|25798|RI	2.185447754	2.734110367	1.109349864	6.738504902	0.028856033
FADS2|16295|AT	2.185413139	45564.19854	3.024041521	686530318.5	0.028858568
SLC39A1|7767|RI	-2.184827035	0.369924743	0.151592132	0.902713839	0.028901531
HM13|58893|ES	2.184329802	2.592917647	1.102815242	6.096417303	0.028938022
HIVEP1|75359|ES	-2.184272594	0.019118591	0.000548774	0.666067518	0.028942223
RASSF4|11351|ES	2.18409709	187946.5701	3.47715439	10158856711	0.028955115
TATDN1|138625|ES	-2.183672562	0.304545893	0.104761864	0.885324077	0.028986317
PKP4|55684|ES	-2.183387136	0.038930273	0.002112657	0.717374538	0.029007312
GPR137B|10368|ES	-2.18266797	1.05E-06	4.51E-12	0.245504523	0.02906027
RNASE4|26461|ES	-2.182013775	0.025527854	0.000946535	0.688480884	0.029108516
PLEC|85515|AP	2.181958705	9.947955236	1.263311542	78.33524042	0.029112581
KDM5C|89207|ES	2.181863001	7.985525235	1.235280917	51.62276239	0.029119645
THADA|53380|AT	2.181789483	11.29357789	1.279507433	99.68281415	0.029125073
ZNF257|48803|AT	2.181708191	2.425860816	1.094251005	5.377925789	0.029131076
SENP5|68262|ES	-2.18131341	0.022195261	0.000724994	0.679495005	0.029160243
ZNF568|49432|AT	2.181295462	13.38766648	1.301141061	137.7480269	0.02916157
CARD8|50715|ES	-2.180584959	0.236990197	0.064971441	0.864446784	0.029214129
BNIP1|74580|ES	2.180349036	12.27387069	1.288462973	116.9206294	0.029231599
EFCAB10|81300|AT	-2.180071405	0.152727567	0.028198716	0.827190484	0.029252169
FGFR2|13296|AT	2.17782404	3.371479401	1.129278009	10.06561118	0.029419139
TMEM70|84217|ES	2.17731354	12.2605995	1.284281707	117.0477624	0.029457182
PPME1|17763|AP	-2.177008433	0.002349419	1.01E-05	0.546875833	0.029479938
PTK2|98071|ME	2.176726798	7.828789705	1.227427645	49.93365475	0.029500958
CAMK2G|12241|ES	2.175732326	5.569923856	1.185676473	26.16569737	0.029575282
SLC12A6|29864|RI	-2.174988056	0.038421087	0.002037379	0.724548501	0.029631011
IP6K2|64744|RI	-2.174731237	0.438711615	0.208783003	0.921856083	0.029650263
CAPN1|16799|AP	-2.17399064	0.057388668	0.004363594	0.754758457	0.029705838
TSC2|33194|ES	-2.172923973	0.371417407	0.152012978	0.907494164	0.02978604
CENPP|86872|AP	2.172246387	2.117289126	1.076060799	4.166040845	0.029837084
TAF6|80897|ES	2.172035985	1216111049	7.709627438	1.92E+17	0.029852949
ADAMTSL4|7484|AP	-2.171866589	0.364064881	0.146275659	0.906119572	0.029865727
FAM222B|39979|AP	2.171862229	3.121533395	1.117462937	8.719726099	0.029866056
TNFSF12|38966|AT	-2.171420087	0.096484041	0.011689776	0.796351443	0.029899432
TNFSF12|38967|AT	2.171386151	10.3640591	1.255681446	85.54217416	0.029901995
SEMA4A|8189|AP	-2.171046106	0.088583384	0.009932287	0.79005127	0.029927687
ST6GAL1|68068|AP	-2.170642828	0.231186672	0.061611	0.867495693	0.029958182
C2CD5|20730|AP	2.170385408	8.388707178	1.229004074	57.25807555	0.029977661
SUPT6H|39943|ES	2.170329316	4.22988696	1.150028739	15.5578231	0.029981907
GBA|8042|ES	2.169752342	31646679.53	5.311160895	1.89E+14	0.030025612
TCEB1|84216|AD	2.16966072	4.231270121	1.149603606	15.57375668	0.030032558
NT5C3B|40955|ES	2.169579555	10.62934105	1.256541067	89.9157968	0.030038712
UBALD1|33765|RI	-2.169407868	0.422349668	0.193857907	0.920154585	0.030051732
RHOC|4233|AD	-2.168993778	0.000396634	3.35E-07	0.470089719	0.030083156
NIF3L1|56772|ES	-2.168992891	4.80E-06	7.49E-11	0.307172038	0.030083224
TNFSF10|67647|ES	2.168878533	533138.13	3.561482153	79808420608	0.030091907
REPIN1|82229|AP	-2.168683448	0.030442504	0.001296923	0.714572661	0.030106725
IP6K2|64751|AA	-2.168263654	0.485246609	0.252402594	0.932891644	0.030138632
ZNF213|33457|AA	-2.167839281	0.201732524	0.047447929	0.857698365	0.030170917
TTPAL|59467|ES	-2.16741385	0.011227122	0.00019371	0.65070655	0.030203312
THYN1|19548|RI	-2.166988372	0.244950602	0.068631222	0.874249294	0.030235741
DBNL|79400|ES	2.166851138	13740389.2	4.803122395	3.93E+13	0.030246207
INO80C|45184|ES	2.166482049	2.746020338	1.101080479	6.848389235	0.03027437
ALS2CL|64466|RI	-2.166414366	0.351330485	0.136371332	0.905125055	0.030279537
VPS33B|32535|ES	-2.166199181	0.002098547	7.92E-06	0.55594337	0.03029597
AFMID|43847|ES	-2.1653572	0.059305185	0.004597933	0.764931758	0.030360341
HTRA2|54103|ES	2.165345544	55.37360127	1.463359691	2095.339743	0.030361233
PSPC1|25403|AT	2.16467477	7.232985106	1.205770536	43.3880842	0.030412601
TOMM7|78942|ES	2.164115298	2.817792143	1.102661107	7.200718794	0.030455502
WDR52|66200|AT	-2.163972249	0.271872536	0.083571044	0.884453184	0.030466479
WDR52|66199|AT	2.163951855	3.678143795	1.130628062	11.96568724	0.030468045
ZNF606|52380|AT	2.163667871	3.421551136	1.12278281	10.42678252	0.030489849
ACADM|3510|ES	2.163607782	9.015163925	1.229941171	66.07891701	0.030494464
CNOT10|63825|ES	-2.162313595	0.000373819	2.92E-07	0.477825364	0.030594013
ZNF257|48804|AT	-2.162256119	0.415312534	0.187263613	0.921078568	0.03059844
TCTN1|24470|AA	2.162099409	313.0762903	1.711272622	57277.11782	0.030610515
GOLGA8B|29887|AP	2.161730666	9.538243713	1.234296185	73.70847796	0.030638942
ZNF266|47338|AD	-2.16167268	0.259029765	0.076109786	0.881574133	0.030643415
VPS28|85599|AP	-2.161502311	0.005314202	4.60E-05	0.613648958	0.030656559
POF1B|89561|AT	-2.161492644	0.031297374	0.001352971	0.723981321	0.030657305
VPS28|85598|AP	2.161316121	188.0793342	1.628852456	21717.02897	0.030670928
SERPINA1|29136|ES	2.16028205	3.287394702	1.116674252	9.677812402	0.030750842
ODF3B|62857|AP	2.160255428	3.410416924	1.12046959	10.3804188	0.030752901
SKP2|71798|AA	-2.16021268	0.064470823	0.005359161	0.775585416	0.030756209
ZNF317|47267|ES	2.160103737	7.625172145	1.207099134	48.16775076	0.03076464
PLA2G16|16516|AP	2.160052159	4.857897545	1.157674638	20.384975	0.030768632
PLA2G16|16517|AP	-2.159813905	0.205858931	0.04905187	0.863940557	0.030787079
SLC6A2|36445|AT	-2.159454404	0.303063703	0.102556633	0.895579407	0.030814931
GLYCTK|65211|ES	-2.158993775	0.393877708	0.169053812	0.917693886	0.03085065
NME2|42514|ES	-2.158180512	0.084422405	0.008943637	0.796895339	0.0309138
CMTM1|36760|AD	-2.157286911	1.03E-06	3.75E-12	0.283382229	0.030983316
C2CD5|20731|AP	-2.157188188	0.120885988	0.017727484	0.82433707	0.030991004
SH3BGR|60637|AP	-2.156934747	0.529994497	0.297661176	0.943670822	0.031010749
PODNL1|47947|AP	2.156809483	1.942310267	1.062463379	3.550775723	0.031020512
TEAD2|95291|ES	2.155899609	6.070993044	1.178108686	31.28485257	0.031091505
PPCDC|31830|ES	-2.155603543	0.0017495	5.45E-06	0.562044527	0.031114636
DHRS1|26955|AA	-2.155029851	0.005522481	4.88E-05	0.62463423	0.031159498
RWDD1|77326|ES	-2.1544253	0.145825971	0.025301318	0.840478513	0.031206834
ORC4|55527|ES	-2.154132167	0.371456459	0.150863186	0.914602862	0.031229809
NUP107|22960|AP	-2.15403748	0.002224758	8.58E-06	0.576762066	0.031237233
ACTR3B|82417|ES	-2.15280694	0.026545558	0.000975346	0.72247897	0.031333855
POLDIP3|62538|ES	2.151297242	2.84854055	1.097573108	7.392840812	0.031452746
SLC39A4|85596|AP	2.150904039	2.792639805	1.095452717	7.119282246	0.031483775
USF2|49098|ES	2.14942494	7.254350009	1.190850965	44.19158704	0.03160073
TPRA1|66610|ES	2.148893865	1506677.155	3.492762387	6.50E+11	0.031642814
WWOX|37672|AT	2.148801266	4.357000637	1.138077912	16.68027676	0.031650157
ACACA|40509|AT	-2.148296951	0.147455579	0.025715958	0.845511876	0.031690173
CPSF4|80630|AP	-2.148289964	0.122263422	0.017972297	0.831743645	0.031690728
ACACA|40508|AT	2.148272064	6.781573446	1.182689585	38.88572199	0.031692149
CPSF4|80629|AP	2.148149953	8.177404901	1.202121959	55.62659461	0.031701845
COASY|41067|AA	2.148021623	5.216330268	1.155592621	23.54644791	0.031712038
PDCD6IP|63894|ES	-2.147217342	0.020157985	0.000571162	0.711434874	0.031775983
LGMN|29011|ES	-2.147019676	0.268855125	0.081047375	0.891862054	0.031791715
QSER1|14865|AP	-2.147005409	0.34067103	0.127471215	0.910454573	0.031792851
THAP1|83742|ES	-2.146940923	0.029644277	0.001193879	0.736073926	0.031797985
CDK2AP1|25064|AP	2.146344944	28.48971792	1.337580547	606.8150655	0.031845468
FLAD1|7869|AA	2.146050556	20.84758152	1.301298328	333.9907889	0.031868945
LAMA4|77296|AT	2.144998903	158.386496	1.547943795	16206.19701	0.031952935
HCCS|88469|AD	-2.144886325	0.000469451	4.27E-07	0.516463534	0.031961937
ZNF195|13966|ES	2.144491622	3.393590438	1.1108663	10.36709464	0.031993516
UQCC1|59105|ES	-2.144409615	0.003495367	1.99E-05	0.614766415	0.032000081
TAMM41|63406|ES	2.144281902	19.90636162	1.293178821	306.4257057	0.032010306
RABGEF1|79894|AP	2.144135694	5.405230859	1.155967119	25.27452567	0.032022016
SNCAIP|73108|ES	-2.143742114	0.013407388	0.000260152	0.690973643	0.032053556
TATDN1|85099|ES	-2.143629915	0.036424222	0.00176214	0.752904874	0.032062552
WDTC1|1318|AA	2.143299022	710.4411069	1.753541461	287832.696	0.032089095
CD44|14988|ES	-2.142308165	0.066585159	0.005583468	0.794055541	0.032168692
ASB6|87871|ES	2.14193302	3570.707039	2.003669494	6363299.334	0.032198872
RASAL2|9075|AP	2.141913241	1.859288299	1.054096124	3.279542443	0.032200464
MLST8|33220|ES	2.140866715	843.6767923	1.767100249	402801.4428	0.032284788
FAM21C|11378|ES	2.13921056	18.21111673	1.275277955	260.0568537	0.032418619
MRPL55|10079|RI	-2.139108841	0.130844682	0.020299323	0.843394173	0.032426855
DGKZ|15541|AP	-2.138852055	0.446041358	0.212850963	0.93470516	0.032447652
ZNF28|51628|ES	-2.138445716	0.192351005	0.042456164	0.871461414	0.032480585
ABHD14B|65146|AA	-2.138297076	0.235346218	0.062490472	0.886340598	0.03249264
BMP2K|69645|AT	2.137058334	2.973911775	1.09452046	8.080389151	0.032593247
BMP2K|69644|AT	-2.136914501	0.336283944	0.123766781	0.913709558	0.032604946
TMOD2|30624|ES	-2.136693496	0.004417965	3.06E-05	0.638605084	0.032622929
D2HGDH|58418|ES	2.136200012	2.588922906	1.081638745	6.196636208	0.032663114
NPIPA5|34143|AP	-2.136027277	0.216826161	0.053326704	0.881614285	0.032677191
UBA5|66823|ES	-2.135604041	4.21E-06	4.91E-11	0.361317136	0.032711702
TCEAL4|89748|ES	2.13552009	55.29420681	1.390790167	2198.354129	0.032718551
HM13|58894|ES	2.135131844	5918.344162	2.039267551	17176165.82	0.032750242
IRAK4|21255|ES	-2.135082656	0.328069391	0.117932019	0.912640402	0.032754259
TCF4|45613|AD	2.135013532	5.25264035	1.145680954	24.0819493	0.032759905
DIS3L|31259|AP	2.13499602	2.552698241	1.079858329	6.034373339	0.032761335
ATF2|56081|ES	-2.134436429	0.002951723	1.40E-05	0.621154591	0.032807072
N4BP2L2|25597|AD	-2.133377984	0.007511805	8.40E-05	0.671935393	0.032893732
PCNP|65953|ES	-2.132558902	0.000226313	1.01E-07	0.506961371	0.032960928
COL1A2|484993|ES	2.132111132	20.32700959	1.275305279	323.9909107	0.032997712
BRD8|73507|ES	-2.131104389	0.211050777	0.050469578	0.882559998	0.033080543
CRYZL1|60454|AA	2.131081404	10.73620669	1.209966239	95.2639258	0.033082436
SMPD1|14098|AA	-2.129428532	0.039689069	0.002036398	0.773533608	0.033218822
MYO18A|40037|AP	2.129185796	23.22498039	1.283992131	420.0958097	0.033238892
BID|61007|ES	-2.129126652	0.403382171	0.174887941	0.930408209	0.033243783
STAU2|84165|ES	-2.128993571	0.000440275	3.58E-07	0.541416366	0.033254792
PPP1R35|97626|ES	2.128666997	125.07031	1.466241591	10668.4891	0.033281821
HNRNPA2B1|79037|ES	2.128293608	2.501316677	1.075206051	5.818963824	0.033312748
RBM22|74108|ES	2.128187568	274515.4604	2.69087833	28005256567	0.033321535
ATP2C1|66761|AT	2.127169295	7.258228195	1.16859831	45.08125338	0.033406019
ATP2C1|66760|AT	-2.127137191	0.137779299	0.02218299	0.855751883	0.033408686
SUOX|22343|ES	-2.127057422	0.127881177	0.019221137	0.850813102	0.033415312
GCNT2|75298|AP	2.126712939	1.809070943	1.047577817	3.124099824	0.033443942
COL6A3|58104|ES	-2.126421088	0.276517674	0.084556685	0.904269416	0.033468213
FIGNL1|79692|AD	2.125823942	2.664003026	1.079445832	6.574588473	0.033517922
PLEKHA5|20645|AT	-2.12580567	0.096729963	0.011226957	0.833412472	0.033519444
EVA1C|60344|AD	2.125741325	3.231595953	1.095789729	9.530306891	0.033524804
GBP6|3718|ES	2.125369461	27.45945279	1.294092281	582.6644349	0.033555796
ITGA7|22211|AP	-2.125325885	0.356390657	0.137630659	0.922863421	0.03355943
LAMA4|77297|AD	2.125279465	4.503924858	1.124190152	18.04440209	0.033563301
KIF13A|75454|AT	2.125219253	72.20038272	1.39482099	3737.322066	0.033568322
FAM63B|30912|AD	-2.124846975	0.053502529	0.003592723	0.796755224	0.033599384
WHSC1|68521|AP	2.124740879	2.351989355	1.068575907	5.176846953	0.03360824
GMPPA|95766|AA	-2.124436334	0.273405469	0.082644961	0.904478013	0.033633674
RASAL2|9074|AP	-2.124038348	0.540497257	0.306356948	0.953584654	0.033666937
TIPARP|67366|AP	-2.123547076	0.12554209	0.018492755	0.852269776	0.033708035
BCAS4|59783|ES	2.123530231	1.921594593	1.051596726	3.511351538	0.033709445
SHPK|38461|AT	2.123403581	29.69686981	1.298241203	679.3067991	0.033720047
MEIS3|50643|AT	-2.123345188	0.232476521	0.060466144	0.893811459	0.033724937
MEIS3|50642|AT	2.123268843	4.301276112	1.118745339	16.53725432	0.03373133
TBRG4|79587|AA	-2.123044724	0.000727229	9.21E-07	0.574024826	0.033750104
C8orf58|83032|ES	2.122636062	4.015963103	1.112429567	14.49796025	0.033784361
TBCEL|19170|ES	-2.122446063	0.023759893	0.000751666	0.751041848	0.033800298
ZNF512|53021|AT	2.121295053	23.59109171	1.27175	437.6171482	0.03389698
ZNF512|53020|AT	-2.121092604	0.042402433	0.002285871	0.786556379	0.03391401
TUFT1|7637|ES	-2.121063815	0.002418544	9.24E-06	0.632812009	0.033916433
BABAM1|48261|AA	-2.12044041	0.253753866	0.071433151	0.901416557	0.033968922
KDM2B|24879|RI	2.120087257	5.443962258	1.136530949	26.07647869	0.033998687
WHSC1|68522|AP	-2.119573711	0.426041042	0.193555806	0.937770733	0.034042011
DENND1C|47051|AP	2.119150324	2.746609092	1.078851186	6.992494985	0.034077765
ARFIP2|14141|AA	-2.119125999	0.198590377	0.044529203	0.885669065	0.03407982
PIK3C3|45320|ES	-2.119111316	0.007372272	7.86E-05	0.69159967	0.034081061
ARID5A|54532|ES	2.11869833	5.867599039	1.141756748	30.15416247	0.03411597
CASKIN2|43450|AP	-2.118283026	0.046533922	0.002723387	0.795115108	0.034151105
CCDC115|55334|ES	-2.118183291	0.083883657	0.008467427	0.831004287	0.034159548
DUSP15|58907|AT	-2.117787525	0.487351103	0.250580234	0.947844503	0.034193066
UNKL|33081|AT	-2.117732038	0.126607496	0.018697535	0.857303292	0.034197768
PLCB2|29964|AT	-2.117678747	0.000219251	9.00E-08	0.533937662	0.034202284
STEAP3|55095|AP	2.117660133	56.94721431	1.351216875	2400.047895	0.034203862
USP39|54321|ES	-2.117093568	0.037098505	0.001757496	0.783102079	0.034251908
TGIF1|44506|AA	2.117013229	536171.7136	2.660876201	1.08E+11	0.034258725
OGFOD2|25015|AA	-2.116986191	0.127686	0.018992676	0.858421116	0.03426102
PNPLA4|88440|AP	-2.116779134	0.013586957	0.000253832	0.727273947	0.034278597
TSPAN17|74677|ES	2.115633597	115.4382765	1.418237487	9396.166584	0.034375982
DNASE1L1|90574|AP	-2.115329097	0.268473435	0.079386795	0.90793419	0.034401908
PTPRE|13458|AP	2.114769134	2.511505368	1.069734353	5.896472521	0.034449629
PAICS|69357|AP	2.113761852	25.14405812	1.264433651	500.0054042	0.034535613
PAICS|69358|AP	-2.113432448	0.039788934	0.002000801	0.791262715	0.034563771
RAB11FIP1|83362|AP	-2.113325638	0.48831981	0.251188099	0.949313432	0.034572906
CCDC51|64649|AA	-2.113176661	0.484522798	0.247425382	0.948820771	0.03458565
SP140L|57884|AP	-2.113079249	0.397814094	0.169187315	0.935389591	0.034593985
SPHK2|50782|AT	-2.112243803	0.101258354	0.012093836	0.847808306	0.034665543
NBPF11|7346|ES	2.111930762	17.6229466	1.229315144	252.6351753	0.034692388
ABCC5|67817|ES	-2.111661007	0.000100963	1.97E-08	0.516354287	0.034715536
SEMA3C|80241|ES	-2.111613513	0.006865685	6.74E-05	0.699257848	0.034719613
GLS2|22442|RI	2.111592348	2.283917698	1.061099182	4.915921282	0.034721429
PDDC1|13753|AA	-2.111547867	0.06809125	0.005622801	0.824574523	0.034725248
TNRC6B|62335|AP	2.111273351	2.971106978	1.081167048	8.164766668	0.034748823
EP400|25233|ES	2.111020474	5.972290806	1.136416825	31.3865975	0.034770552
ZNF821|37507|ES	2.111004404	2.856657937	1.077993735	7.570076058	0.034771933
PIP5K1A|7580|ES	2.110809821	12.61997103	1.198630909	132.871318	0.034788662
SH2D3A|47085|RI	-2.110675349	0.242917314	0.065282664	0.903897265	0.034800226
RAB11FIP1|83363|AP	2.110013436	2.045456077	1.052207106	3.976299475	0.034857199
AURKA|59858|AD	2.109732326	3.14019635	1.084622469	9.091488881	0.034881418
LSM14A|48951|ES	2.108657211	10.28445416	1.178622064	89.74038466	0.034974181
RAD1|71742|ES	-2.108380521	0.118389064	0.016287564	0.860532047	0.034998088
NAV2|14700|ES	2.108375706	2.556246301	1.068296398	6.116649991	0.034998504
VAMP7|90683|ES	-2.108276178	0.003280498	1.61E-05	0.668732299	0.035007107
WDR91|81881|ES	-2.107789583	0.002752746	1.15E-05	0.661367919	0.035049194
ATXN3|28956|ES	-2.107159951	0.003813168	2.15E-05	0.677704511	0.035103717
PDE4B|3306|AP	-2.107081575	0.329745842	0.117489658	0.925462907	0.035110509
ATXN2L|35846|ES	2.106140626	2.632355517	1.06948329	6.479105973	0.035192139
TCF25|38159|ES	-2.106057358	0.089804292	0.009532396	0.846042384	0.03519937
DNAJC17|30045|AD	-2.105678903	0.029545222	0.001113828	0.783711663	0.035232254
PPP2R1B|18672|AT	-2.105585777	0.070563999	0.005981334	0.832469436	0.035240349
PPP2R1B|18674|AT	2.105530934	14.17063701	1.201162841	167.1771273	0.035245118
BDP1|72440|ES	-2.105337203	0.010192027	0.000142577	0.728569002	0.035261966
PML|31653|ES	-2.105231005	0.087039753	0.008965982	0.844962539	0.035271205
ST3GAL6|65794|AT	-2.105186641	0.14441223	0.023833137	0.87503764	0.035275065
RPRD1A|45203|RI	-2.104653978	0.000422076	3.04E-07	0.58614297	0.035321439
PORCN|88986|ES	2.104332794	2230.691319	1.697154474	2931956.895	0.035349427
NPIPA5|34144|AP	2.104052301	4.510167337	1.108664109	18.34785599	0.035373885
DCAF6|8887|ES	-2.103710498	0.186069146	0.038837554	0.891449731	0.035403708
SLC39A4|85597|AP	-2.103662202	0.366786752	0.144072661	0.933782448	0.035407924
RNF145|74403|AP	2.103435235	5.269344748	1.120029917	24.79040394	0.035427741
IL15RA|10675|AP	2.10308637	2.680642516	1.069407328	6.719464245	0.03545822
ZNF208|48801|AT	2.103078464	2.045654111	1.049910139	3.985770385	0.035458911
IRAK4|21268|ES	-2.102823967	0.01489625	0.000295304	0.751422086	0.03548116
ACOT8|59634|ES	-2.102655122	0.00550696	4.32E-05	0.702575424	0.035495928
TMEM161B|72742|AA	2.102602768	9.317566233	1.16347393	74.61881032	0.035500508
MLH1|63951|AA	-2.102447468	0.045400742	0.002541775	0.810940071	0.035514097
UNKL|33080|AT	2.102182701	7.944794466	1.150517385	54.86206459	0.035537275
PPP1R26|88106|AP	-2.102125218	0.246852247	0.066982609	0.909729145	0.035542308
GPD2|55628|AT	-2.10185732	4.98E-06	5.66E-11	0.438557018	0.035565776
TMEM231|37620|AD	2.100433476	154.6344831	1.400918892	17068.67079	0.035690727
TESC|24677|ES	-2.10008905	0.018576664	0.000450231	0.76647793	0.035721008
EEF1D|85445|ES	-2.099840842	0.186131504	0.038750679	0.894047219	0.035742844
ADAM19|74386|AT	2.09897762	23001.69173	1.944804351	272046811.3	0.035818874
BTF3L4|2996|ES	-2.09861278	0.048748306	0.002901359	0.819063517	0.035851049
COL1A1|265558|ES	2.09807566	6.090463464	1.126294063	32.93433432	0.035898462
SFTPA1|12328|ES	-2.098011505	0.164682144	0.030537753	0.888087897	0.035904129
ZNF586|52341|ES	2.097507884	3.532252553	1.086271653	11.48590048	0.03594864
NME4|32875|AP	2.097116824	3.313109233	1.081493131	10.14957236	0.035983235
RTCA|3878|ES	2.097022248	16.88585777	1.202898798	237.0375573	0.035991606
GABARAPL1|20345|AP	2.096872116	16.7576038	1.202072752	233.6108898	0.036004897
MFF|57817|ES	-2.096851606	0.013482287	0.00024078	0.754929462	0.036006714
FAM203B|85550|RI	2.096782142	2.92663975	1.072583938	7.98559434	0.036012865
RNF220|2557|AT	2.096355367	55.62734006	1.298824702	2382.462358	0.036050679
RNF220|2558|AT	-2.096338141	0.017976181	0.000419694	0.769948966	0.036052206
FGD5|63534|ES	-2.096125897	0.045514217	0.002531975	0.81815349	0.036071024
ANXA2|99348|ES	2.096110546	3.05006894	1.075119845	8.652914913	0.036072386
MIF4GD|43425|ES	2.095699387	6.453266775	1.128361472	36.90719076	0.036108866
CLEC7A|20314|ES	2.095494611	2.222766705	1.053018761	4.691931433	0.036127047
C19orf12|48855|ES	-2.095232049	0.364860337	0.142076546	0.936981295	0.03615037
DFNA5|79018|AP	-2.095104417	0.11357523	0.014842404	0.86908649	0.036161711
UPB1|61404|AT	2.095069345	2.067927755	1.047968003	4.080587564	0.036164829
TOR1AIP2|9125|ES	2.094570211	126.8112975	1.365080026	11780.33878	0.036209216
MUTYH|2651|ES	2.09427934	4.831166914	1.106295815	21.0975884	0.036235104
SLC35E4|61792|AT	2.093705037	3.800453729	1.089026761	13.26271223	0.036286264
LRTOMT|17550|ES	2.093691899	10.5983852	1.162743517	96.60408087	0.036287435
SLC35E4|61791|AT	-2.0936188	0.26314	0.07540298	0.918301367	0.036293951
PDXK|60788|AT	2.093061595	88.79699499	1.330143454	5927.861613	0.036343657
PDXK|60789|AT	-2.093034646	0.011262457	0.000168709	0.751842732	0.036346062
ADAMTSL1|85946|AT	2.09232508	3.092312887	1.074027677	8.903307801	0.036409446
GALK2|30529|ES	-2.092283841	0.202277398	0.045267642	0.90387181	0.036413132
TTC12|18779|ES	-2.092150182	0.317904194	0.108652175	0.930152356	0.036425083
ZNF33A|11310|AA	2.090813165	4.394329015	1.097069371	17.60155555	0.036544816
SEPT4|42688|AP	2.090554081	2.408379508	1.056440668	5.490409477	0.036568056
RPL39L|68072|ES	2.09044664	770345.9108	2.330442606	2.55E+11	0.036577697
DISP1|9903|AT	-2.089812452	0.012360889	0.000200747	0.761116891	0.03663465
TRMT11|77440|ES	-2.089526264	0.00176935	4.64E-06	0.675070454	0.036660376
NMT2|10868|RI	2.089349151	5.69979257	1.113800414	29.1682737	0.036676305
SLC25A30|25809|ES	-2.088670842	0.009383642	0.000117405	0.749988586	0.036737363
TPRKB|53980|ES	2.088028538	9.634573886	1.149055916	80.78372221	0.036795261
IL15RA|10674|AP	-2.087963166	0.375711663	0.14988984	0.941753316	0.036801157
OSBPL1A|44899|AD	-2.087890949	0.070174316	0.005794982	0.849775675	0.036807673
NUDT6|70523|AP	-2.087878401	0.442735461	0.206047656	0.951307539	0.036808805
COL1A1|306225|ES	-2.087187513	0.17483984	0.033997368	0.899156946	0.036871188
SMARCD3|82365|ES	-2.086598616	0.177471567	0.034980625	0.900388625	0.036924432
DST|76561|ES	-2.08638456	0.212707722	0.049693345	0.910475538	0.036943802
STT3A|19305|ES	2.085364243	3202435.657	2.461485773	4.17E+12	0.03703625
AR|89346|AP	2.084780388	154.0469265	1.351996038	17552.16353	0.03708924
CPNE1|59198|ES	-2.084753087	0.36902192	0.144550538	0.942073133	0.037091719
LIN7B|50889|ES	2.084585964	52.86033752	1.267690384	2204.178022	0.0371069
DIAPH2|89595|AT	-2.084559779	0.344941137	0.126800022	0.938362515	0.037109279
DIAPH2|89594|AT	2.084534592	2.899014693	1.065672658	7.886367475	0.037111567
COL1A1|402556|ES	-2.084266811	0.093257657	0.010018798	0.868067287	0.037135904
TLN2|30978|AT	-2.08420609	0.155722014	0.027092248	0.895065843	0.037141425
TLN2|30977|AT	2.084189477	6.421614364	1.117219785	36.9104912	0.037142936
ERLIN1|12788|RI	-2.084048258	0.026020212	0.000841345	0.804725153	0.037155778
ATP6AP2|88832|ES	-2.083971766	0.415401774	0.181819277	0.949066772	0.037162736
MSI2|42612|AP	-2.083724087	0.020595082	0.000534169	0.79405057	0.037185272
NEU3|17810|AT	2.083355773	3.406395622	1.075292124	10.79105005	0.037218806
ZNF208|48799|AT	-2.083129971	0.507514459	0.268109581	0.960692736	0.037239378
UGGT2|26130|AT	-2.083076834	0.204309672	0.045850151	0.910410126	0.037244221
GAB1|70700|ES	-2.082982465	0.382339866	0.154724541	0.944800178	0.037252822
P4HA1|12122|ME	-2.082875885	0.133516119	0.020075679	0.887967679	0.037262538
LILRB1|51917|AP	2.082310277	3.663470518	1.079273607	12.43523065	0.037314138
TMBIM4|22891|AT	-2.081910367	0.28399669	0.086825708	0.928919808	0.037350658
TMBIM4|22893|AT	2.08188892	3.521101147	1.076504855	11.51704354	0.037352617
VHL|63312|ES	-2.081597033	0.015739615	0.000315749	0.784595379	0.037379293
ZNF333|48020|AT	-2.081275804	0.167522923	0.031144048	0.901100914	0.037408669
ZNF160|51651|AT	-2.081266497	0.003310808	1.53E-05	0.716892844	0.03740952
TXNRD1|24095|AP	-2.080989947	0.012478112	0.000200919	0.774954233	0.037434826
SYTL2|18156|AD	2.080770733	1.85409965	1.036495558	3.316642782	0.037454896
CNIH4|9954|AA	-2.08075291	0.04758605	0.002702293	0.837967005	0.037456528
BAZ2B|55698|ES	-2.08060162	0.209171727	0.047907623	0.91327452	0.037470386
NDUFS4|72009|AA	-2.079913245	0.01581123	0.000317539	0.787288259	0.037533491
CABYR|44856|AP	-2.079707055	3.60E-09	3.98E-17	0.326487053	0.037552411
PPIH|2096|AP	2.079611871	249.4897772	1.373761854	45309.99951	0.037561147
EFCAB4A|13776|ES	2.07931329	3.213387301	1.069298312	9.656667208	0.037588564
ZMYM3|89407|AP	-2.07912884	0.0142983	0.000260794	0.783917741	0.03760551
SCARF1|38355|AA	-2.079053895	0.04781689	0.002721431	0.840166452	0.037612397
PPIL3|56767|AD	-2.078590695	0.147590496	0.024296249	0.89655626	0.037654987
APLP2|19476|ES	2.07841418	8.182551242	1.127265281	59.39519825	0.037671228
ATG4A|89853|ES	2.077947242	3545.156101	1.590537369	7901814.837	0.037714219
GALK2|30535|ES	2.077919528	3.382626669	1.071627202	10.67737284	0.037716772
CAST|196584|ES	2.077573153	199.4939192	1.349573464	29489.18667	0.037748691
FBXO7|61936|AA	-2.07741029	0.013801795	0.000242678	0.784948808	0.037763707
SLC16A5|43347|AP	2.077317258	3.248930717	1.068832382	9.875777516	0.037772287
DNAJC1|10978|ES	-2.076767009	4.79E-05	4.02E-09	0.571574861	0.037823069
HSPA14|10830|AT	-2.076493969	0.260864295	0.073380267	0.927363487	0.037848288
HSPA14|10831|AT	2.076468274	3.833354422	1.078308014	13.6274663	0.037850662
SNAPC5|31277|ES	2.076299929	2.513444773	1.052997299	5.999449982	0.03786622
RUNX2|76402|AT	2.075887496	33.47104456	1.216583451	920.8664007	0.037904357
RUNX2|76401|AT	-2.075887496	0.02987657	0.001085934	0.821974028	0.037904357
UBTF|41833|ES	2.075641412	8.571681587	1.127199112	65.1825613	0.037927128
TRMT1|47922|RI	2.075517556	2.439511861	1.050903719	5.662952766	0.037938593
TSKU|17902|AP	-2.075491946	0.422453109	0.187235108	0.953168619	0.037940965
RAPGEF6|73230|AT	-2.075473362	0.0120088	0.000184452	0.781835817	0.037942685
TSKU|17903|AP	2.075439918	2.367074722	1.049109635	5.340759969	0.037945782
COL1A1|306957|ES	-2.074665175	0.26893177	0.077770944	0.929965526	0.038017577
PICALM|18175|ES	-2.074416596	1.69E-06	5.95E-12	0.480331202	0.038040637
OSGIN1|37797|AP	-2.07432758	0.000812361	9.77E-07	0.675500461	0.038048898
UPB1|61403|AT	-2.073701405	0.487164841	0.246877825	0.961324019	0.038107051
CNKSR1|1240|AD	-2.073467265	0.159978976	0.028294112	0.904544126	0.038128815
TACC2|13335|AP	2.073256514	4.509865406	1.085791877	18.73184578	0.038148413
PRKCZ|235|AP	2.072570265	2.988276928	1.06128109	8.414169523	0.038212291
COL1A1|568295|ES	-2.072393942	0.1799745	0.035549024	0.911159203	0.038228718
LSM6|70767|AT	-2.071760789	0.039454121	0.001853287	0.839927949	0.038287755
WLS|3361|AT	-2.071344712	0.140071069	0.021807184	0.899699113	0.038326594
ZNF451|76590|AA	2.071254452	44145.87295	1.7765374	1096998070	0.038335023
EIF2B5|67831|AT	2.071047778	292.2690757	1.355988511	62995.52826	0.038354331
ECHDC2|3034|ES	-2.070536619	0.179077406	0.035153726	0.912242332	0.038402121
STRA13|44263|AD	2.070318288	1391.139309	1.470792064	1315800.257	0.038422548
SLC25A16|11951|AA	-2.068818543	0.041595556	0.002045291	0.845938331	0.038563118
CD300A|43254|ES	2.068383953	53.02181419	1.231379659	2283.059299	0.038603933
SLC52A2|114729|ES	2.068330745	2.760766822	1.054646757	7.226906445	0.038608933
FANCD2|63307|AT	-2.068233201	0.095068515	0.010222846	0.884100429	0.0386181
RAB3IP|23343|AP	-2.068220342	0.264748648	0.075141174	0.932802124	0.038619308
NTMT1|87861|AP	-2.067291875	0.147677394	0.024085457	0.905468104	0.038706659
C16orf72|252014|ES	2.067151626	2344.8694	1.495375139	3676945.241	0.038719869
THYN1|19549|AD	-2.066974381	0.258528959	0.07168589	0.932362313	0.038736568
CFLAR|56795|AT	2.066447007	205.9057396	1.315897993	32219.19468	0.038786291
DLG4|38844|AP	-2.06611468	0.27919802	0.083232322	0.936553646	0.038817652
SLC25A36|67052|ES	2.06577232	2.920726665	1.056433895	8.074943724	0.038849983
SPEF2|71768|AT	2.065579561	3.195212247	1.061196183	9.620635153	0.038868196
ZNF12|78759|RI	-2.065388542	0.012983644	0.000210422	0.801126788	0.038886252
ZNF713|79764|AT	-2.064797202	0.109413911	0.0133947	0.893741864	0.038942193
THRA|40841|AA	-2.064753779	0.035148918	0.001464271	0.843728149	0.038946303
TMEM161B|72735|RI	-2.064301755	0.327794807	0.113680893	0.945184652	0.038989115
ZMYM3|89406|AP	2.064289406	67.69415252	1.237407423	3703.305961	0.038990285
RBM42|49233|ES	2.064165996	3.523098458	1.065637597	11.64769597	0.03900198
ZDHHC14|78241|AA	-2.064101016	0.319081805	0.107853185	0.943998066	0.03900814
FMO3|8977|ES	-2.062919747	0.059154596	0.004029622	0.868385696	0.039120254
CENPK|72212|AT	-2.062043873	0.134769477	0.020057277	0.905547221	0.039203559
CENPK|72213|AT	2.061946789	7.419448567	1.104200968	49.85344031	0.039212802
PDE3B|14476|AD	-2.061734925	0.00096169	1.30E-06	0.709703911	0.03923298
PSMG4|75187|ES	-2.06144692	0.360458061	0.136623395	0.951008524	0.039260423
EPB41L2|77529|AP	2.061352672	10.5453713	1.122845035	99.03847148	0.039269407
SP140L|57885|AP	2.061316295	2.46106257	1.045276064	5.794477826	0.039272875
BANF1|16981|AD	2.060473044	3.180312143	1.058059949	9.559368855	0.03935334
CBFA2T2|58992|AA	2.060418572	8.798160647	1.111842608	69.62103289	0.039358543
MAATS1|66354|AT	2.06034464	2.207674646	1.039337573	4.68935933	0.039365605
MTDH|84631|ES	-2.05996885	0.012704426	0.000199506	0.809008553	0.039401519
GADL1|63808|AT	2.059625703	49.88693024	1.208266231	2059.732982	0.039434337
YDJC|61232|ES	2.059501816	4.157334874	1.07129225	16.13325706	0.039446191
DCN|23664|ES	2.058379746	3.427013501	1.060658379	11.07276552	0.039553694
COL1A1|564859|ES	2.05807981	3.666366849	1.063895788	12.63492724	0.039582473
GABPB1|30577|ES	-2.058067027	0.002269394	6.88E-06	0.748105192	0.0395837
PTPN13|69831|AT	-2.057828051	1.44E-05	3.54E-10	0.588547451	0.039606642
PRICKLE4|76141|AA	-2.057821174	0.386784023	0.156514467	0.955834201	0.039607303
IRF8|37917|AT	-2.057547451	0.000954601	1.27E-06	0.719054441	0.039633595
ZNF226|50295|AA	-2.057468938	0.258851118	0.071435827	0.937959343	0.03964114
COL3A1|485096|ES	-2.057073141	0.39663703	0.164340779	0.957284824	0.039679191
EIF2B5|67832|AT	-2.05662751	0.003564354	1.66E-05	0.767256685	0.03972207
HNRNPH1|74913|AD	-2.056478339	0.070996312	0.005706702	0.883255517	0.039736432
SLC22A17|26735|AD	-2.056227975	0.196995463	0.041873866	0.926764506	0.039760547
THYN1|19546|ES	2.056058459	13.37669129	1.128866062	158.5093889	0.039776882
WLS|3362|AT	2.055473022	7.266349653	1.096532941	48.15161979	0.039833339
RPAP1|30097|ES	-2.055182169	0.035101431	0.001438951	0.856256282	0.039861413
SULT1A3|94132|AP	2.055078029	3.142991175	1.054431228	9.368456908	0.039871469
SMARCE1|40869|AT	-2.055001628	0.07683115	0.00664684	0.88809506	0.039878847
SMARCE1|40868|AT	2.054970666	13.0150351	1.12596199	150.4412582	0.039881838
AHDC1|1331|ES	-2.054603705	0.466267297	0.225181827	0.965465084	0.039917298
SMIM7|48196|ES	2.054439723	30.50855578	1.170207323	795.3906604	0.039933152
PCDHA3|73771|AT	-2.054123424	0.248420183	0.065780614	0.938157665	0.039963747
MLTK|55995|AP	2.054049565	5.828040031	1.084088406	31.33143977	0.039970895
D2HGDH|58421|ES	2.053335392	5.831545556	1.083484027	31.38664043	0.040040061
RAD51C|42718|AD	-2.052932588	0.347215045	0.126474046	0.953225513	0.040079116
EZH2|82163|AD	-2.052580033	0.111118383	0.013634137	0.905616172	0.040113326
SLC25A36|67053|ES	2.05232401	12.06026669	1.118571965	130.0318954	0.040138184
FAM195B|44177|RI	-2.05230556	0.500796085	0.258723172	0.969363188	0.040139976
EMC9|26855|AA	2.052297237	3.912918483	1.063302234	14.39941586	0.040140784
WIBG|22288|AP	-2.052236993	0.121837435	0.016317994	0.909692738	0.040146636
LRCH3|68326|AD	-2.052206292	0.127815902	0.017919541	0.911680974	0.040149618
ENOSF1|44459|AP	-2.051662878	0.333080723	0.116530231	0.95205139	0.040202437
ENOSF1|44460|AP	2.051636582	3.002227182	1.050348578	8.581311231	0.040204994
MARS|22593|AT	-2.05133718	0.097751535	0.010598157	0.90160609	0.040234122
MARS|22594|AT	2.051324838	10.23002698	1.109117031	94.35744744	0.040235323
TUBA4A|57673|AP	-2.05049408	1.65E-05	4.40E-10	0.614888487	0.040316241
NPM2|82919|ES	-2.050230345	0.029764157	0.001034157	0.856644558	0.040341958
ZNF189|87091|AA	-2.050172804	0.291451695	0.089679372	0.94719765	0.040347571
MMP19|22283|ES	-2.04988787	0.044450505	0.002264999	0.872339319	0.040375374
ANKRD16|10668|ES	-2.049880135	0.070407794	0.005569158	0.890126886	0.040376129
PMF1|8197|ES	-2.049046148	0.007501289	6.96E-05	0.808391344	0.040457603
SLMAP|65401|ES	-2.049040116	0.320890211	0.1081864	0.95178809	0.040458192
ANKRD65|168|ES	2.048604873	2.282542123	1.036354622	5.027235301	0.040500768
APOBEC3F|62276|AT	2.048549021	2.804025015	1.045594647	7.519698293	0.040506234
APOBEC3F|62275|AT	-2.048549021	0.356630199	0.132984059	0.956393572	0.040506234
TM9SF1|26894|AT	-2.047984211	0.008407135	8.68E-05	0.814335813	0.040561547
TM9SF1|26893|AT	2.047957812	118.9392217	1.227918964	11520.74271	0.040564133
APOO|88704|ES	-2.046873166	4.29E-05	2.82E-09	0.65247471	0.040670539
GALNT15|63632|AT	-2.04656481	0.012097433	0.000176408	0.829600023	0.040700833
SPTLC3|58700|AT	-2.046419206	0.069734735	0.005442008	0.893591671	0.040715144
DBF4B|41884|AT	2.046182764	4.510448297	1.065531921	19.09294639	0.040738392
DBF4B|41883|AT	-2.046163861	0.22171011	0.052375894	0.938511382	0.040740252
PRKAG2|82394|AA	2.045421942	4.646437593	1.066282674	20.24733481	0.040813278
PPP4C|36051|AP	2.045231474	274334.598	1.685491917	44651339407	0.040832043
MYH14|51169|ES	-2.04469082	0.334888471	0.117351145	0.955681241	0.040885349
MRPL23|13895|RI	2.044246003	4.574210726	1.064692294	19.65206651	0.040929251
LETMD1|21761|ES	-2.043792747	0.261758446	0.072389729	0.946508364	0.040974026
GNB2L1|75085|ES	-2.043766387	0.052309601	0.003088204	0.886047152	0.040976631
DECR1|84410|ES	-2.043548833	0.010053542	0.000121996	0.828497558	0.040998138
FIBP|16938|AD	-2.043180361	0.005685071	3.99E-05	0.810126772	0.041034587
SLC29A1|76359|AP	2.042174312	1.85948862	1.025285415	3.372424768	0.041134244
TPM3|257715|ES	-2.04159003	0.340837311	0.121278489	0.95787863	0.041192215
PRSS23|18204|RI	-2.04157765	3.70E-06	2.26E-11	0.606546408	0.041193444
IFT20|39880|RI	2.041370772	1175.41282	1.325667361	1042188.514	0.041213987
PCID2|26361|AA	2.041351472	3.853458427	1.055255255	14.07161138	0.041215904
ATE1|13322|ES	-2.041316138	3.17E-06	1.67E-11	0.603765747	0.041219414
RABL2B|62930|ES	2.041116256	24.58826062	1.135778457	532.3067685	0.041239273
PARPBP|24042|ES	-2.04106513	0.025101472	0.000729434	0.86379861	0.041244354
TLE2|46656|RI	-2.041053265	0.434618232	0.195251123	0.967436217	0.041245533
FBXL8|36937|RI	-2.040724908	0.413460826	0.177030543	0.965651754	0.041278178
EIF1AD|16964|AA	2.040129332	3.119671882	1.045720539	9.306838952	0.041337446
FGFR2|13293|AP	2.039363503	29315.53793	1.492518306	575805844.6	0.041413762
DNAJC7|40973|ES	-2.038582085	0.184058056	0.036162358	0.936813018	0.041491755
QARS|64826|ES	2.038391539	19661.17176	1.462842427	264253803.4	0.041510792
ABHD11|80028|ES	-2.038243894	0.403577219	0.168650602	0.965751497	0.041525548
PRUNE|7542|ES	-2.038189159	0.041179357	0.001916582	0.884772792	0.041531019
IER3IP1|45443|AT	2.038167003	106.412295	1.196118574	9466.934771	0.041533234
IER3IP1|45442|AT	-2.037990046	0.009400711	0.000105662	0.836374636	0.041550928
SLC35G1|12567|AT	2.037776154	2.956147428	1.042256479	8.384507839	0.041572324
TSSC1|52555|ES	-2.03761717	0.084540545	0.007852708	0.910145156	0.041588234
MCTP2|32586|AT	2.037592528	9.068018188	1.087625717	75.60409117	0.0415907
MCTP2|32585|AT	-2.037553769	0.110281841	0.013227243	0.919472355	0.041594579
FAM212B|4181|AP	2.03675836	16.94562826	1.112604098	258.0920901	0.041674263
ANXA8L1|11445|ES	2.036672202	157.689311	1.209976513	20550.74503	0.041682902
TMEM179B|16427|ES	2.036596255	341.6332858	1.245465897	93710.55625	0.041690518
ACIN1|26706|ES	2.036376754	2.588310268	1.036329779	6.46449632	0.041712538
ARID5B|11865|AP	2.036053224	2.620809957	1.036662366	6.625729898	0.041745011
SCGB3A2|73966|AP	-2.035685382	0.650150024	0.429519119	0.984112313	0.041781958
TCEAL3|89760|AD	-2.035597522	0.131145626	0.018547606	0.927298906	0.041790787
VPS16|58560|AP	2.035574074	11.43725182	1.094739222	119.4903101	0.041793143
VPS16|58559|AP	-2.035550215	0.087436557	0.008369207	0.913485826	0.041795541
SUPT20H|25658|AP	2.035419503	57.70630042	1.162226366	2865.20527	0.041808681
C8orf47|84642|ES	2.034767734	17.45975793	1.110863755	274.419924	0.041874249
CHEK2|61530|AD	-2.034218143	1.31E-05	2.59E-10	0.663419563	0.041929606
NOD1|79120|RI	-2.033599876	0.220250456	0.051242035	0.946688853	0.041991954
LRRC29|36981|AP	2.033463588	2.318319863	1.030858846	5.213717677	0.042005709
FA2H|37572|ES	-2.032651254	7.76E-05	8.44E-09	0.71288462	0.042087769
ARHGAP11A|29820|RI	2.032548441	9.592422725	1.084090901	84.87717553	0.042098165
PRTFDC1|11018|ES	2.03249166	624.8555031	1.25824419	310308.9231	0.042103907
FAXC|99934|ES	-2.031421649	0.261710198	0.071799288	0.953940201	0.04221224
ZNF585A|49449|AT	2.030982002	5.24880097	1.059689373	25.99810126	0.04225682
PDLIM7|74781|AA	-2.030268328	0.24150406	0.061265648	0.951988809	0.042329272
NUDT6|70521|AP	2.029949104	2.202794687	1.027600892	4.721973744	0.042361713
HEATR6|42848|ES	-2.029930321	0.403837151	0.168261815	0.969230272	0.042363622
WSB1|39832|AT	-2.029796809	0.115748989	0.014429558	0.928498885	0.042377197
WSB1|39833|AT	2.029796809	8.63938434	1.077007216	69.30219281	0.042377197
NT5C|43357|AP	-2.029756798	0.328177017	0.111906383	0.962412973	0.042381266
PLEKHA5|20649|ES	2.029583158	12.91712662	1.091730488	152.8327384	0.042398928
ANKDD1A|31141|ES	-2.029382449	0.244545245	0.06275389	0.952966845	0.042419351
LARGE|61941|AP	-2.029373086	0.18836763	0.037567211	0.944503544	0.042420304
NR4A2|55614|AP	2.029255317	2.054087276	1.024884071	4.11683102	0.042432292
TRAK2|56837|AT	2.029087088	38469.22678	1.432837628	1032832598	0.042449421
ACADVL|38853|RI	-2.029009427	0.272185484	0.077439222	0.956684949	0.04245733
IDNK|86684|AP	2.028500136	4.188226257	1.049581802	16.71259843	0.042509229
CHD3|39068|AP	2.028020851	2.273277254	1.027942061	5.027315906	0.04255812
ACP5|47751|ES	2.027949315	3.351599746	1.041378593	10.78687514	0.042565421
PHTF1|4279|ES	-2.027901386	0.014766137	0.000251111	0.868296397	0.042570314
GZMH|27015|ES	2.027054063	1145.889922	1.262552551	1040007.175	0.042656884
DNM1|87724|ME	-2.026730693	0.143907901	0.022075195	0.93813369	0.042689962
FAM161A|53702|ES	-2.026557999	0.412000621	0.174763385	0.971281895	0.042707636
CCL28|71947|AT	2.026552403	3.922485527	1.045931462	14.71023032	0.042708208
CCL28|71946|AT	-2.026537555	0.254942973	0.067980596	0.956095168	0.042709728
CD44|14985|ES	-2.026008759	0.009072083	9.59E-05	0.857875735	0.042763887
ADA|59483|ES	2.025956569	35.77613584	1.123585286	1139.149748	0.042769235
LMBR1|82471|ES	-2.025449626	0.000336204	1.46E-07	0.772147314	0.042821216
DNAJC4|16596|RI	-2.02538636	0.182786287	0.035296148	0.946585626	0.042827707
SNAPC5|31269|AT	-2.025292041	0.037798025	0.001587901	0.89973513	0.042837385
MFF|57803|ES	2.02513594	3.263492799	1.038797963	10.25260505	0.042853407
SNAPC5|31270|AT	2.025116564	26.44975182	1.111123978	629.6231428	0.042855396
TMEM91|50052|RI	-2.024494534	0.417498689	0.179226329	0.972542126	0.042919294
CPNE1|59204|ES	-2.024492426	0.065419384	0.004668323	0.916752202	0.04291951
TDP1|28815|ES	-2.024446004	0.401439795	0.16590757	0.971347534	0.042924282
C5orf63|73184|AA	-2.023983056	0.097745746	0.010283458	0.929087361	0.042971895
TBC1D23|65817|ES	2.023134184	2.449151154	1.028363362	5.832900702	0.043059315
ANKAR|56517|AP	-2.02310258	0.445127464	0.203207232	0.975056139	0.043062573
PML|31639|ES	-2.023100934	0.152898488	0.02478903	0.943076338	0.043062742
HNRNPK|86714|ES	2.022541353	190.2582743	1.176312796	30772.60664	0.043120456
NT5C|43358|AP	2.022203565	3.034592393	1.034756427	8.899438313	0.043155326
SLC29A1|76356|AP	-2.021772172	0.538032784	0.295016974	0.981229226	0.043199894
MYLK|66476|AP	-2.021430308	0.611051502	0.379018524	0.985133743	0.04323524
SMURF2|43074|ES	-2.021354313	0.289309108	0.086912677	0.96303282	0.0432431
PHF23|38857|AA	2.020479348	455.8849004	1.201255406	173011.5356	0.04333369
PACSIN2|62554|AP	-2.01991342	0.030536506	0.001034208	0.901634736	0.043392369
MTMR12|71647|ES	2.01986055	2495.597469	1.261069947	4938668.742	0.043397854
ACCS|15473|AT	2.019009255	6.769923881	1.057523808	43.33885347	0.043486258
ACCS|15474|AT	-2.019009255	0.147712148	0.023073984	0.945605189	0.043486258
C17orf49|38822|AA	2.018811024	9.453636838	1.067672555	83.70660937	0.043506865
GRB10|79711|AP	2.018556343	2.530399328	1.027314253	6.232679765	0.043533352
CBWD3|86513|ES	-2.018062425	0.084661046	0.007695528	0.931384164	0.04358476
DHPS|47836|AD	-2.018037663	0.239905621	0.059968283	0.959752466	0.043587339
ATG13|15597|AA	-2.017436445	0.18031414	0.034139228	0.952370371	0.043649987
KLHL24|67806|ES	-2.017361345	0.450938233	0.208005623	0.977595159	0.043657818
DBI|55115|AD	-2.017016423	0.2835276	0.083305626	0.964975646	0.043693799
ETFDH|70998|ES	2.0167822	107.9394593	1.140985677	10211.28233	0.043718247
ATXN2L|35856|AA	2.016773497	3.091457402	1.032302956	9.258046598	0.043719156
VIPAS39|28601|AD	-2.016698513	0.148696699	0.023328552	0.947795989	0.043726985
NRG4|31910|AT	2.016597982	8.094715168	1.060488272	61.7870234	0.043737484
SDHD|18736|ES	-2.016438019	0.282543091	0.082707094	0.965220691	0.043754193
SLC23A2|58632|ES	-2.016183055	0.014690252	0.000242755	0.888975118	0.043780838
SCGB3A2|73965|AP	2.015516032	1.530818405	1.011805189	2.316063421	0.043850608
HMOX2|33743|AP	-2.015168469	0.344355793	0.122095097	0.971217636	0.043887
OSBPL5|13952|AP	-2.015152928	0.253096927	0.066514436	0.963069951	0.043888628
FAM3A|90631|ES	-2.015139651	0.015121821	0.000256479	0.891572219	0.043890019
CORO7|33660|AP	-2.015022261	0.005285247	3.22E-05	0.866533292	0.043902317
RPGR|88808|ES	-2.014917803	0.363277133	0.135665669	0.972761026	0.043913262
SDHAF2|16233|ES	-2.014804959	0.296264278	0.090727499	0.967430197	0.043925089
ASB7|32738|ES	-2.014802085	0.008218235	7.70E-05	0.877496218	0.04392539
NPIPB4|94071|RI	-2.014680148	0.057857344	0.003616844	0.925523014	0.043938174
C17orf75|40200|AA	-2.014662479	0.022232473	0.000548094	0.901821081	0.043940026
POLR2J3|81119|ES	2.014380823	348989.9564	1.411674353	86276264347	0.043969566
BECN1|41139|ES	2.014043906	3.358513946	1.033065347	10.91858899	0.044004924
RHNO1|19726|ES	2.013490399	334.0736217	1.16706099	95629.26504	0.044063064
PDK1|55983|ES	2.013342777	9.519052076	1.061561076	85.35764402	0.044078581
PGAP2|14024|ES	-2.013321928	0.396707101	0.161280356	0.975794744	0.044080773
TRPM4|50904|ES	-2.013213794	0.001611784	3.08E-06	0.843592763	0.044092143
BCKDK|36239|ES	2.012680605	3327762.257	1.481937203	7.47E+12	0.044148241
NFAT5|37292|AD	-2.01258928	0.07715076	0.006364647	0.935203472	0.044157856
S100A13|7733|AP	-2.01219346	0.148347412	0.023124407	0.951676485	0.044199548
ECE1|963|AP	2.011730708	5.177853203	1.043222174	25.6993807	0.044248332
INO80B|54064|AA	-2.011564847	3.91E-06	2.11E-11	0.726594457	0.044265828
AKT1|29567|RI	-2.011319527	0.107169273	0.012159229	0.944570838	0.044291717
ZNF230|50262|AT	2.011135324	846.5836264	1.187111875	603737.3994	0.044311165
SLC6A2|36444|AT	2.011044568	2.997609978	1.028276949	8.738565604	0.044320749
CMC2|37721|ES	-2.010735535	0.228677641	0.054278415	0.963430179	0.044353399
FNBP1|87882|AA	-2.010676353	0.314723503	0.101981491	0.971263341	0.044359653
ST3GAL3|2482|AD	-2.010255312	0.133297688	0.018687013	0.950835421	0.044404174
YTHDF3|83978|ES	2.009143316	62.96785207	1.106721644	3582.608522	0.044521937
OSBPL1A|44891|ES	-2.008439225	0.105836565	0.011825313	0.947237376	0.044596638
CREM|11261|ES	-2.008381679	0.439274271	0.196826873	0.980363514	0.044602748
TTC23|32620|AD	-2.008216857	0.399422929	0.163095748	0.978190281	0.044620252
PSMG4|75186|ES	-2.007935238	0.310599373	0.099204849	0.972452163	0.044650174
RAD18|63078|AD	-2.007886999	4.57E-05	2.66E-09	0.787810568	0.044655301
GAPVD1|87570|AD	-2.007808408	0.19940572	0.041320151	0.962306287	0.044663655
HAUS3|68549|ES	2.007475961	7.967193523	1.05034425	60.43368412	0.044699008
TRIM73|80116|AT	-2.007053511	0.41310694	0.17423401	0.979472058	0.044743966
FMR1|90272|ES	-2.007013579	0.138261405	0.020023783	0.954675563	0.044748217
FASTKD3|71526|AA	-2.006797922	0.216359442	0.048514006	0.96490503	0.044771184
CTNNBIP1|579|AP	2.005892891	5.40689685	1.039399022	28.12638161	0.044867677
TRAPPC10|60801|AT	2.005401307	16.25985322	1.065223748	248.194642	0.044920162
TRAPPC10|60802|AT	-2.005298575	0.061511855	0.004029917	0.938904684	0.044931137
NR4A3|87062|AT	-2.00515393	0.119673166	0.015023553	0.953280939	0.044946594
HNRNPR|1044|ES	-2.004958715	1.99E-06	5.29E-12	0.744787977	0.044967461
SLC35G1|12570|AT	-2.004627827	0.390898035	0.156032817	0.979289335	0.045002849
ARID5B|11866|AP	-2.004597873	0.385994103	0.152183103	0.979027534	0.045006054
KLC4|76229|RI	-2.004143129	0.261776894	0.070581956	0.97088755	0.045054731
NUSAP1|30083|AA	-2.004035679	0.179234588	0.033362762	0.962901021	0.045066239
ZNF260|49393|AD	2.003818825	5.848759913	1.039411878	32.91091169	0.045089472
PEX5|20090|AD	-2.003561119	0.098586981	0.010221943	0.950836166	0.045117094
SPAST|53147|ES	-2.003512273	0.036597684	0.001439236	0.930626181	0.045122332
ELMO1|79266|AP	2.003104264	10.72340255	1.052422142	109.2635339	0.045166098
C15orf57|29992|AT	2.003083743	13.0646151	1.056880448	161.4980843	0.045168301
PHACTR2|77987|ES	-2.003020025	0.312002955	0.099813839	0.975274025	0.045175139
TFIP11|61515|ES	2.002663673	3.811207808	1.028937739	14.11679678	0.0452134
SEMA4D|86804|AP	-2.002623686	0.161321188	0.027055808	0.96188315	0.045217696
CPNE1|59186|ES	2.002579149	141.7307595	1.111177546	18077.76646	0.04522248
MACF1|1887|ES	-2.00234344	0.255375894	0.067128477	0.971522818	0.045247807
MMP19|22273|RI	-2.002081408	0.393447667	0.157868775	0.980567987	0.045275977
SCN8A|21861|AT	-2.002073234	0.069239899	0.005071115	0.945386558	0.045276856
DAZAP1|46478|AA	2.00164445	151.9557797	1.110273927	20797.17305	0.045322985
SLC26A1|68438|ES	-2.001505177	0.304554632	0.095070753	0.975626266	0.045337976
WIPF2|40852|AP	2.001396689	735.7639161	1.146428356	472204.4228	0.045349657
ZFP28|52182|AT	2.00136859	4.89250921	1.033392087	23.16317947	0.045352683
YY1AP1|8097|AP	2.000851024	13.90386998	1.055260732	183.1941572	0.045408447
ZFP28|52183|AT	-2.000350927	0.204567973	0.043210513	0.968469306	0.045462383
USP35|18020|ES	-1.999888811	0.213375724	0.046955086	0.969632962	0.045512272
COPS3|39474|ES	-1.999830391	0.001271419	1.85E-06	0.875536602	0.045518582
ZNF148|66552|ES	-1.999731613	0.020594924	0.000458199	0.925692235	0.045529253
LANCL1|57277|AD	1.999447701	2.611414987	1.019136082	6.691440282	0.045559935
MSANTD2|19241|AP	1.999291769	3.399378971	1.024361119	11.28096057	0.045576794
MSANTD2|19240|AP	-1.999269091	0.294174948	0.088645857	0.976231748	0.045579247
THOC1|44445|ES	1.998815011	13.34293317	1.051650767	169.2899119	0.045628373
BAZ1A|27173|AP	1.998666839	10.49507694	1.046575847	105.2447754	0.045644413
BAZ1A|27172|AP	-1.998489471	0.095301623	0.009503439	0.955696086	0.04566362
FAM222B|39980|AP	-1.997392129	0.350004148	0.124936625	0.980520352	0.045782602
CNOT1|36670|AT	1.997094285	590.7979182	1.125970576	309992.2747	0.045814942
CNOT1|36669|AT	-1.996830866	0.001694199	3.23E-06	0.888871968	0.045843559
ECHDC2|3030|ES	-1.996674658	0.417799317	0.177379858	0.984081683	0.045860537
CEP89|48911|AT	-1.996534352	0.017359381	0.000324575	0.928439659	0.04587579
DNAJC4|16600|ES	-1.996393173	0.143860344	0.02144113	0.965238261	0.045891143
ABCB9|25001|ES	1.996305257	4.655534061	1.028394854	21.07555995	0.045900706
SFTPA2|12312|ES	-1.996204143	0.13301415	0.01835274	0.964039375	0.045911707
KANSL2|21456|AD	-1.996086516	0.003974249	1.75E-05	0.904803965	0.045924506
EHD3|53139|ES	-1.99562467	0.000679588	5.26E-07	0.877796843	0.045974792
C19orf24|46447|AP	1.995533309	3.182513474	1.020849249	9.921535453	0.045984745
C19orf24|46446|AP	-1.995515402	0.314220647	0.100792109	0.97958676	0.045986696
WNT2B|4199|AP	-1.995433389	0.604499898	0.368704305	0.991092649	0.045995632
RABEP2|35889|AP	1.995244835	2.298766692	1.014827253	5.207121005	0.046016183
TSFM|22754|AT	-1.995077981	0.016562327	0.00029484	0.930370601	0.046034375
PPP2R4|87833|AP	-1.994766654	0.228446388	0.053549556	0.97456928	0.046068336
RHOA|64860|ES	1.994460505	7.969261987	1.036551961	61.26961217	0.046101752
WNT2B|4198|AP	1.994258059	1.653868033	1.008689337	2.711716453	0.04612386
RABEP2|35888|AP	-1.993856836	0.435791204	0.192614375	0.985980271	0.046167702
TRIM73|80115|AT	1.993500679	2.403759964	1.014863743	5.693436195	0.046206649
GGT1|61437|AA	-1.993301455	0.431791892	0.189081444	0.986052541	0.046228447
PLCH2|275|ES	1.992780807	6.318213239	1.030822927	38.72616479	0.046285454
FOXRED1|19376|AA	-1.992749669	0.002251946	5.61E-06	0.904571707	0.046288866
NAB2|22516|ES	1.992094677	9.87617484	1.03762833	94.00170236	0.046360671
PGF|28457|ES	1.992017283	4.729388667	1.025317104	21.81482888	0.046369162
AZI2|63795|AA	1.991524514	4.505649893	1.024142456	19.82232144	0.046423253
TUBD1|42819|ES	-1.991136452	0.010089459	0.000109392	0.930570588	0.046465888
EEFSEC|66643|ES	-1.990908445	0.004576796	2.28E-05	0.919683466	0.046490954
EML3|16360|AP	-1.99088275	0.41870202	0.177697777	0.986570483	0.046493779
ARHGEF11|8338|ES	1.990786568	2.283763929	1.01286802	5.149316185	0.046504357
RABGGTA|26950|RI	-1.990282954	0.211477206	0.045793699	0.976610534	0.046559775
ARL6IP4|25030|ES	-1.989868242	0.263292784	0.070727402	0.980144723	0.046605452
SLC35B3|75287|ES	-1.989463795	0.002851293	8.87E-06	0.916776151	0.046650034
APLP2|19477|ES	1.989176245	8.527163944	1.031975604	70.45953862	0.046681753
ATG16L2|17666|AA	-1.989055516	0.362535466	0.133396935	0.985269747	0.046695076
UPF1|48507|AD	-1.988394274	0.05383107	0.003021411	0.959082937	0.046768102
LAIR1|51879|AD	1.988216351	8.551873099	1.030966378	70.93784537	0.046787767
BCL2L11|54968|RI	-1.988187868	0.213140265	0.046436676	0.978295107	0.046790916
ZNF283|50248|AT	1.987931104	9.279142545	1.031837579	83.4457749	0.04681931
TRA2A|78976|ES	-1.987380579	0.201163737	0.041372061	0.978120204	0.046880238
MYLK|66481|RI	1.987167641	35.12281296	1.049925775	1174.951621	0.046903822
USP38|70697|AT	-1.986991835	0.042489704	0.00188463	0.957946757	0.046923302
USP38|70696|AT	1.986854573	23.53018916	1.043671736	530.5018642	0.046938515
PNPLA6|47111|AA	1.986625378	6.356424412	1.02513125	39.4136178	0.046963927
SSBP2|72676|ES	-1.986589023	0.002626856	7.47E-06	0.923451905	0.046967959
C3orf18|65061|AP	-1.986303647	0.371352267	0.139725951	0.986949854	0.046999618
WSB1|39835|RI	-1.985608511	0.273389241	0.076004082	0.983390301	0.047076811
ZNF83|51483|AT	1.985530098	2.112278787	1.009674916	4.418968523	0.047085525
ZNF83|51481|AT	-1.98551018	0.473426022	0.22629896	0.990425224	0.047087739
CIDEB|26958|AP	1.9854516	3.090526542	1.014590144	9.414002654	0.04709425
LTBP3|16864|AP	-1.985432822	0.268701182	0.07342778	0.983283507	0.047096337
PPIL2|61240|RI	-1.98531928	0.164552848	0.027708925	0.977217256	0.04710896
RAMP2|41121|AP	-1.9852881	0.236369788	0.056908131	0.981769663	0.047112427
EPHX2|83163|ES	-1.985216914	0.002966526	9.48E-06	0.928636526	0.047120343
VCPKMT|27450|ES	1.98514066	4.092713379	1.018033041	16.45359446	0.047128824
DOK1|54114|AP	1.985114149	2.064354416	1.009225282	4.222604441	0.047131773
SMIM7|48190|AD	-1.984721675	0.375956441	0.143078656	0.987870934	0.047175446
CHEK1|19312|AT	1.983418461	4.578764853	1.018154144	20.59127069	0.047320707
CHEK1|19311|AT	-1.98336842	0.218408453	0.04856638	0.982207283	0.047326292
ZBTB17|778|AA	1.983311307	40.25226617	1.044459045	1551.276653	0.047332667
DTNA|45094|AT	-1.982261966	0.344713437	0.120259515	0.988091083	0.047449928
METTL23|43632|ES	-1.981056226	0.03736662	0.001445994	0.965608948	0.047584969
RND3|55563|AP	-1.980855533	0.007647246	6.16E-05	0.949900026	0.047607477
RGMA|32575|ES	-1.98066435	0.067641223	0.004705964	0.972241777	0.047628927
KIAA0513|37875|AP	1.980420134	2.316434075	1.008714577	5.319509548	0.047656339
EIF6|59080|RI	-1.979796151	0.006470099	4.40E-05	0.950760847	0.047726439
PPFIA3|50893|RI	1.979778201	63412.7818	1.117021759	3599912773	0.047728457
CBWD5|86506|ES	-1.979706413	0.03327926	0.001145737	0.966635013	0.047736528
KIAA0391|27217|ES	1.979531316	26.51126168	1.032928756	680.4409227	0.047756217
STAT3|41034|AA	1.979433003	1063.104086	1.070947924	1055317.698	0.047767276
LSMD1|39062|AD	-1.979330197	0.022654897	0.00053262	0.963621621	0.047778842
ARHGEF3|65361|AP	-1.979273787	0.475609801	0.227850682	0.992775972	0.047785189
ARHGAP11A|29817|AT	1.978725066	30.77355474	1.033023035	916.7381941	0.047846969
ARHGAP11A|29816|AT	-1.978603513	0.032503358	0.001091126	0.96823672	0.047860664
C19orf47|49879|AP	-1.978519205	0.07275663	0.005425239	0.97572236	0.047870164
DCAF10|86447|ES	1.978412056	5.105191455	1.015317776	25.66977591	0.047882241
POLR3B|24144|AP	-1.978261949	0.046869353	0.002259808	0.972089756	0.047899163
SIRT3|13599|ES	1.978058193	1724409.063	1.140379543	2.61E+12	0.047922142
DYSF|53935|AP	-1.977929136	0.421651022	0.179189597	0.992186975	0.047936702
SH2D4A|82870|AP	1.977893539	2.517460038	1.008404362	6.28478543	0.047940718
MFSD7|68396|AA	-1.977848287	0.000352259	1.33E-07	0.930627074	0.047945824
PMM2|33941|ES	-1.977027366	0.011001196	0.00012583	0.96182488	0.048038537
ZNF655|80692|ES	-1.976956672	0.384428313	0.149004505	0.991816506	0.048046528
ZBTB7C|45454|AP	-1.976936006	0.223163334	0.050447281	0.987206301	0.048048864
ARFRP1|60152|AP	-1.976769266	0.213938167	0.046373515	0.986975839	0.048067717
CIDEB|26957|AP	-1.976684171	0.325110773	0.106706359	0.990540912	0.048077341
NCOA2|84118|ES	-1.97626865	0.187169289	0.035520037	0.986269879	0.048124358
STARD3|40660|ES	1.974379209	325081.819	1.097094015	96325554254	0.04833864
SLMO2|60015|ES	1.974149994	3422.45492	1.060223276	11047859.39	0.04836469
USP36|43919|AD	-1.974105341	0.000189866	3.83E-08	0.940461317	0.048369766
PDLIM5|69980|AA	-1.973803333	0.002170792	4.92E-06	0.95791211	0.04840411
ATG10|72682|AT	1.973264023	8.321958295	1.014384096	68.27294528	0.04846549
FOSB|50449|AP	-1.973239582	0.291504509	0.085682538	0.991740915	0.048468273
FOSB|50448|AP	1.973189184	3.430367992	1.008296115	11.67060389	0.048474012
TNNT1|52026|ES	1.97236996	2.663540386	1.006180946	7.050866362	0.048567389
METTL23|43627|RI	1.97221897	2.791837497	1.006400108	7.744789125	0.048584615
SPNS1|35907|RI	-1.971965009	0.000809813	6.85E-07	0.957601867	0.048613601
TNFSF4|9015|AP	1.971657007	3.005334851	1.006547259	8.973287132	0.048648775
PLEKHA5|20652|AD	1.971354364	100.8843166	1.027017834	9909.901271	0.048683357
SNCAIP|73113|ES	-1.97067701	0.062647215	0.003984225	0.985053228	0.048760832
LCORL|68867|ES	1.969961705	2.199191897	1.004007632	4.817139678	0.04884276
C22orf39|61055|AT	-1.96879297	0.181593472	0.033229439	0.992378759	0.04897687
VGLL4|63390|AP	1.96863275	110.5522731	1.020936516	11971.17048	0.048995279
SIDT2|18886|RI	-1.968356682	0.296126605	0.08814717	0.994824519	0.049027012
ZNF584|52451|ES	1.968286746	6.138920054	1.007702628	37.39827442	0.049035054
ELOVL5|76490|AP	-1.968012103	0.000300806	9.35E-08	0.967382154	0.049066645
UBE2F-SCLY|58194|AT	-1.967684222	0.001264502	1.64E-06	0.974157861	0.049104382
R3HDM4|46347|ES	1.967385505	49911.5218	1.041652613	2391545873	0.049138784
CLCN6|689|ES	-1.967274288	0.396302649	0.157596898	0.996566505	0.049151598
URGCP|79363|ES	-1.967136762	0.018554187	0.000349299	0.985567137	0.049167446
PCGF2|40586|AP	1.966689806	4.338608525	1.005031457	18.72928833	0.049218983
TMEM106C|21397|ES	1.966604176	8422.803792	1.030989424	68811204.16	0.049228862
SOX7|82608|AP	1.966355972	2.546408074	1.003042975	6.464522697	0.049257505
RPF2|77253|ES	1.965912057	35799.27462	1.032234151	1241567199	0.04930877
HNRNPA2B1|79035|AA	1.965676149	3.786410056	1.003876535	14.28153823	0.049336032
DHRS7B|39806|ES	1.965366144	2069674.874	1.040783461	4.12E+12	0.049371875
ZFYVE21|29513|ES	1.965130124	17.66411255	1.007577557	309.6742977	0.049399179
PFAS|39148|ES	-1.965054314	0.079143172	0.006304933	0.993450931	0.049407952
IFNAR1|60398|AP	-1.965020669	0.241118152	0.058351168	0.996346184	0.049411845
IFNAR1|60399|AP	1.964982528	4.147218625	1.003639497	17.13705207	0.04941626
LAMTOR3|70083|ES	1.964641319	13.19245743	1.006160407	172.9753345	0.049455766
MRS2|75508|AA	-1.964465426	0.041396143	0.001726191	0.992729336	0.049476142
SUOX|22334|AP	1.964418594	2.978856106	1.002478293	8.851646727	0.049481568
TNC|87349|ES	1.964293345	1.958663291	1.001482784	3.830681812	0.049496083
CMC2|37726|ES	-1.964237995	0.394202348	0.15571057	0.997976512	0.049502498
MED31|38769|AP	-1.963739551	0.000183984	3.44E-08	0.983599981	0.049560303
GCH1|27604|AA	-1.963640925	0.005876133	3.49E-05	0.990427291	0.049571748
C7orf49|81873|AD	1.962808216	2.697928894	1.001439206	7.26835965	0.049668463
GCH1|27603|AA	-1.962781177	0.000411689	1.71E-07	0.988873798	0.049671606
NPRL3|32807|ES	-1.962775417	0.071493599	0.005130686	0.996228312	0.049672275
NCOA7|77430|ES	1.962759788	56.66579365	1.005767211	3192.599772	0.049674092
COL1A1|282807|ES	1.962540118	4.048118442	1.001837105	16.357213	0.049699635
SORBS1|12636|ES	-1.962491505	0.520522087	0.271171177	0.999159445	0.049705289
COL1A1|265656|ES	1.962313036	8.458159721	1.002559199	71.35784695	0.04972605
MRPL33|53044|AT	1.962246413	24.56979571	1.003730856	601.4310088	0.049733803
KDM2B|24877|AT	1.96223594	18.39102347	1.003377162	337.0913322	0.049735021
TPRKB|53981|AA	1.962176211	20.7379174	1.003424192	428.5936315	0.049741973
CARKD|26254|AA	-1.962118431	0.253221558	0.064217933	0.998493016	0.049748698
RARS2|76964|ES	1.962094119	112.314662	1.005138812	12550.09074	0.049751528
MRPL33|53045|AT	-1.961984545	0.040716476	0.001663306	0.996708735	0.049764284
PTPN13|69836|ES	-1.961723156	0.067551843	0.004574292	0.997586307	0.049794724
ELN|80040|ES	1.96104108	4.439229533	1.000818977	19.69063267	0.049874231
PIDD|13767|AD	-1.960914104	0.037806039	0.001431567	0.998414287	0.049889044
SEC14L2|61745|ES	-1.960675709	6.92E-06	4.82E-11	0.995696668	0.049916864
HPS3|67212|ES	-1.960666539	0.014882882	0.000221834	0.998493471	0.049917935
FLAD1|91161|ES	1.960659498	3.371635459	1.000431237	11.36302552	0.049918757
GPR89A|7316|ES	-1.960532774	0.019734976	0.000389913	0.998861823	0.049933551
HNRNPA2B1|79038|AA	-1.960481628	0.009007837	8.12E-05	0.998757239	0.049939523
SLC25A23|47037|AT	1.960370815	45.01565954	1.00079037	2024.809254	0.049952465
SUOX|22333|AP	-1.960340304	0.336547995	0.113288234	0.999790967	0.049956028
SOX7|82607|AP	-1.960333736	0.393571536	0.154925801	0.999824132	0.049956795
